# Supplementary material for: Discordance in maternal and paternal genetic markers in lesser long-nosed bat Leptonycteris yerbabuenae, a migratory bat: recent expansion to the North and male phylopatry
Source: PeerJ. 2021 Sep 29;9:e12168. doi: 10.7717/peerj.12168 (PMC8487242; doi:10.7717/peerj.12168)
Supplement: Supplemental Information 7 [file peerj-09-12168-s007.xlsx]

## Sheet: Hoja1
Collection	Species	ID	Sex	State	Municipio	Locality	Day	Month	Year	Altitude	LAT_GRA	LAT_MIN	LAT_SEG	LON_GRA	LON_MIN	LON_SEG	Longitude	Latitude
CNMA IB	Leptonycteris yerbabuenae	5048	H	Arizona	Cochise Co.	Miller Canyon, 10 mi SSE FT Huachaca	18	8	1950								-110.278	31.4237
CNMA IB	Leptonycteris yerbabuenae	5048	H	Arizona	Cochise Co.	Miller Canyon, 10 mi SSE FT Huachaca	18	8	1950								-110.278	31.4237
CNMA IB	Leptonycteris yerbabuenae	3953	H	Baja California Norte	Isla Angel de la Guarda		13	5	1985								-113.43	29.3395
CNMA IB	Leptonycteris yerbabuenae	23900	H	Baja California Norte	Isla Angel de la Guarda		13	5	1985								-113.43	29.3395
CNMA IB	Leptonycteris yerbabuenae	23901	H	Baja California Norte	Isla San Esteban		6	5	1985								-112.577	28.7003
CNMA IB	Leptonycteris yerbabuenae	30047	H	Baja California Sur	Isla Carmen		13	5	1987								-111.18	26.01
CNMA IB	Leptonycteris yerbabuenae	30049	H	Baja California Sur	Isla Carmen		12	5	1987								-111.14	25.99
CNMA IB	Leptonycteris yerbabuenae	30329	H	Baja California Sur	Isla San José	Isla San José, Punta Norte	19	8	1986								-110.71	25.1
CNMA IB	Leptonycteris yerbabuenae	30330	H	Baja California Sur	Isla San José	Isla San José, Punta Norte	19	8	1986								-110.71	25.1
CNMA IB	Leptonycteris yerbabuenae	32535	M	Baja California Sur	Isla del Espíritu Santo	Frente a Isla Bahía	3	11	1986								-110.41	24.48
CNMA IB	Leptonycteris yerbabuenae	30048	H	Baja California Sur	Isla Cerralvo	Isla Cerralvo, Punta Norte	19	8	1986								-109.92	24.3
CNMA IB	Leptonycteris yerbabuenae	30050	H	Baja California Sur	Isla Cerralvo	Isla Cerralvo, Punta Norte	19	8	1986								-109.92	24.3
CNMA IB	Leptonycteris yerbabuenae	30051	H	Baja California Sur	Isla Cerralvo	Isla Cerralvo, Punta Norte	19	8	1986								-109.92	24.3
CNMA IB	Leptonycteris yerbabuenae	30052	H	Baja California Sur	Isla Cerralvo	Isla Cerralvo, Punta Norte	19	8	1986								-109.92	24.3
CNMA IB	Leptonycteris yerbabuenae	30328	H	Baja California Sur	Isla Cerralvo	Isla Cerralvo, Punta Norte	19	8	1986								-109.92	24.3
ENCB IPN	Leptonycteris yerbabuenae	7603	H	Baja California Sur		30 km S, 15 Km W Loreto 640 m	3	10	1975								-111.497	25.7409
ENCB IPN	Leptonycteris yerbabuenae	7604	H	Baja California Sur		30 km S, 15 Km W Loreto 640 m	3	10	1975								-111.497	25.7409
ENCB IPN	Leptonycteris yerbabuenae	7605	H	Baja California Sur		30 km S, 15 Km W Loreto 640 m	3	10	1975								-111.497	25.7409
Museo de Zoología FC	Leptonycteris yerbabuenae	6205	H	Baja California Sur	Los Cabos	Ejido Miraflores, calle 1 en Huerta de Don Chito Hernández	24	6	1996	215							-109.778	23.3683
Museo de Zoología FC	Leptonycteris yerbabuenae	6206	H	Baja California Sur	Los Cabos	Ejido Miraflores, calle 1 en Huerta de Don Chito Hernández	22	6	1996	215							-109.778	23.3683
ENCB IPN	Leptonycteris yerbabuenae	43599	H	CDMX		Delegación Iztapalapa	8	3	2011								-99.0532	19.3421
ENCB IPN	Leptonycteris yerbabuenae	23315	M	CDMX		15 km S, 10 km E Amatepec	6	2	1986	860							-99.1494	19.3209
ENCB IPN	Leptonycteris yerbabuenae	23314	H	CDMX		15 km S, 10 km E Amatepec	6	2	1986	860							-99.1494	19.3209
ENCB IPN	Leptonycteris yerbabuenae	23313	M	CDMX		15 km S, 10 km E Amatepec	6	2	1986	860							-99.1494	19.3209
ENCB IPN	Leptonycteris yerbabuenae	23312	M	CDMX		15 km S, 10 km E Amatepec	6	2	1986	860							-99.1494	19.3209
CNMA IB	Leptonycteris yerbabuenae	20720	M	Chiapas	Ocozucuautla	Cueva el Tempizque	27	4	1984								-93.3	16.76
CNMA IB	Leptonycteris yerbabuenae	20721	H	Chiapas	Ocozucuautla	Cueva el Tempizque	27	4	1984								-93.3	16.76
CNMA IB	Leptonycteris yerbabuenae	20722	M	Chiapas	Ocozucuautla	Cueva el Tempizque	27	4	1984								-93.3	16.76
CNMA IB	Leptonycteris yerbabuenae	20723	H	Chiapas	Ocozucuautla	Cueva el Tempizque	27	4	1984								-93.3	16.76
CNMA IB	Leptonycteris yerbabuenae	20724	M	Chiapas	Ocozucuautla	Cueva el Tempizque	27	4	1984								-93.3	16.76
CNMA IB	Leptonycteris yerbabuenae	20725	M	Chiapas	Ocozucuautla	Cueva el Tempizque	27	4	1984								-93.3	16.76
CNMA IB	Leptonycteris yerbabuenae	20726	M	Chiapas	Ocozucuautla	Cueva el Tempizque	27	4	1984								-93.3	16.76
CNMA IB	Leptonycteris yerbabuenae	20727	H	Chiapas	Ocozucuautla	Cueva el Tempizque	27	4	1984								-93.3	16.76
CNMA IB	Leptonycteris yerbabuenae	20728	M	Chiapas	Ocozucuautla	Cueva el Tempizque	27	4	1984								-93.3	16.76
CNMA IB	Leptonycteris yerbabuenae	20729	M	Chiapas	Ocozucuautla	Cueva el Tempizque	27	4	1984								-93.3	16.76
CNMA IB	Leptonycteris yerbabuenae	24393	M	Chiapas	Ocozucuautla	Cueva el Tempizque	27	10	1986								-93.3	16.62
CNMA IB	Leptonycteris yerbabuenae	24394	H	Chiapas	Ocozucuautla	Cueva el Tempizque	27	10	1986								-93.3	16.62
CNMA IB	Leptonycteris yerbabuenae	47600	H	Chiapas	Tuxtla Gutierrez	Cueva Los Laguitos, 4 Km NW Tuxtla Gutierrez	9	6	2009	781msnm	16	46	42	93	8	55	-93.1486	16.7783
CNMA IB	Leptonycteris yerbabuenae	47601	M	Chiapas	Tuxtla Gutierrez	Cueva Los Laguitos, 4 Km NW Tuxtla Gutierrez	9	6	2009	781msnm	16	46	42	93	8	55	-93.1486	16.7783
CNMA IB	Leptonycteris yerbabuenae	47602	M	Chiapas	Tuxtla Gutierrez	Cueva Los Laguitos, 4 Km NW Tuxtla Gutierrez	9	6	2012	781msnm	16	46	42	93	8	55	-93.1486	16.7783
CNMA IB	Leptonycteris yerbabuenae	47603	H	Chiapas	Tuxtla Gutierrez	Cueva Los Laguitos, 4 Km NW Tuxtla Gutierrez	9	6	2009	781msnm	16	46	42	93	8	55	-93.1486	16.7783
CNMA IB	Leptonycteris yerbabuenae	47604	H	Chiapas	Tuxtla Gutierrez	Cueva Los Laguitos, 4 Km NW Tuxtla Gutierrez	9	6	2009	781msnm	16	46	42	93	8	55	-93.1486	16.7783
CNMA IB	Leptonycteris yerbabuenae	47605	H	Chiapas	Tuxtla Gutierrez	Cueva Los Laguitos, 4 Km NW Tuxtla Gutierrez	10	6	2009	781msnm	16	46	42	93	8	55	-93.1486	16.7783
CNMA IB	Leptonycteris yerbabuenae	47606	M	Chiapas	Tuxtla Gutierrez	Cueva Los Laguitos, 4 Km NW Tuxtla Gutierrez	29	11	1950	781msnm	16	46	42	93	8	55	-93.1486	16.7783
CNMA IB	Leptonycteris yerbabuenae	47608	H	Chiapas	Tuxtla Gutierrez	Cueva Los Laguitos, 4 Km NW Tuxtla Gutierrez	29	11	1950	781msnm	16	46	42	93	8	55	-93.1486	16.7783
CNMA IB	Leptonycteris yerbabuenae	47609	H	Chiapas	Tuxtla Gutierrez	Cueva Los Laguitos, 4 Km NW Tuxtla Gutierrez	29	11	1950	781msnm	16	46	42	93	8	55	-93.1486	16.7783
CNMA IB	Leptonycteris yerbabuenae	47610	H	Chiapas	Tuxtla Gutierrez	Cueva Los Laguitos, 4 Km NW Tuxtla Gutierrez	29	11	1950	781msnm	16	46	42	93	8	55	-93.1486	16.7783
CNMA IB	Leptonycteris yerbabuenae	47611	H	Chiapas	Tuxtla Gutierrez	Cueva Los Laguitos, 4 Km NW Tuxtla Gutierrez	13	6	2009	781msnm	16	46	42	93	8	55	-93.1486	16.7783
CNMA IB	Leptonycteris yerbabuenae	47612	H	Chiapas	Tuxtla Gutierrez	Cueva Los Laguitos, 4 Km NW Tuxtla Gutierrez	23	6	2009	781msnm	16	46	42	93	8	55	-93.1486	16.7783
CNMA IB	Leptonycteris yerbabuenae	47613	M	Chiapas	Tuxtla Gutierrez	Cueva Los Laguitos, 4 Km NW Tuxtla Gutierrez	24	6	2009	781msnm	16	46	42	93	8	55	-93.1486	16.7783
CNMA IB	Leptonycteris yerbabuenae	47614	M	Chiapas	Tuxtla Gutierrez	Cueva Los Laguitos, 4 Km NW Tuxtla Gutierrez	24	6	2009	781msnm	16	46	42	93	8	55	-93.1486	16.7783
CNMA IB	Leptonycteris yerbabuenae	47615	M	Chiapas	Tuxtla Gutierrez	Cueva Los Laguitos, 4 Km NW Tuxtla Gutierrez	24	6	2009	781msnm	16	46	42	93	8	55	-93.1486	16.7783
CNMA IB	Leptonycteris yerbabuenae	47617	M	Chiapas	Tuxtla Gutierrez	Cueva Los Laguitos, 4 Km NW Tuxtla Gutierrez	4	6	2009	781msnm	16	46	42	93	8	55	-93.1486	16.7783
CNMA IB	Leptonycteris yerbabuenae	47618	H	Chiapas	Tuxtla Gutierrez	Cueva Los Laguitos, 4 Km NW Tuxtla Gutierrez	12	6	2009	781msnm	16	46	42	93	8	55	-93.1486	16.7783
CNMA IB	Leptonycteris yerbabuenae	47619	M	Chiapas	Tuxtla Gutierrez	Cueva Los Laguitos, 4 Km NW Tuxtla Gutierrez	12	6	2009	781msnm	16	46	42	93	8	55	-93.1486	16.7783
CNMA IB	Leptonycteris yerbabuenae	47620	M	Chiapas	Tuxtla Gutierrez	Cueva Los Laguitos, 4 Km NW Tuxtla Gutierrez	12	6	2009	781msnm	16	46	42	93	8	55	-93.1486	16.7783
CNMA IB	Leptonycteris yerbabuenae	47621	H	Chiapas	Tuxtla Gutierrez	Cueva Los Laguitos, 4 Km NW Tuxtla Gutierrez	12	6	2009	781msnm	16	46	42	93	8	55	-93.1486	16.7783
CNMA IB	Leptonycteris yerbabuenae	47622	M	Chiapas	Tuxtla Gutierrez	Cueva Los Laguitos, 4 Km NW Tuxtla Gutierrez	12	6	2009	781msnm	16	46	42	93	8	55	-93.1486	16.7783
CNMA IB	Leptonycteris yerbabuenae	47623	H	Chiapas	Tuxtla Gutierrez	Cueva Los Laguitos, 4 Km NW Tuxtla Gutierrez	12	6	2009	781msnm	16	46	42	93	8	55	-93.1486	16.7783
CNMA IB	Leptonycteris yerbabuenae	47624	H	Chiapas	Tuxtla Gutierrez	Cueva Los Laguitos, 4 Km NW Tuxtla Gutierrez	20	10	2012	781msnm	16	46	42	93	8	55	-93.1486	16.7783
CNMA IB	Leptonycteris yerbabuenae	47625	M	Chiapas	Tuxtla Gutierrez	Cueva Los Laguitos, 4 Km NW Tuxtla Gutierrez	12	6	2009	781msnm	16	46	42	93	8	55	-93.1486	16.7783
CNMA IB	Leptonycteris yerbabuenae	47732	H	Chiapas	Tuxtla Gutierrez	Cueva Los Laguitos, 4 Km NW Tuxtla Gutierrez	12	6	2009	781msnm	16	46	42	93	8	55	-93.1486	16.7783
CNMA IB	Leptonycteris yerbabuenae	47733	H	Chiapas	Tuxtla Gutierrez	Cueva Los Laguitos, 4 Km NW Tuxtla Gutierrez	12	6	2009	781msnm	16	46	42	93	8	55	-93.1486	16.7783
CNMA IB	Leptonycteris yerbabuenae	47734	H	Chiapas	Tuxtla Gutierrez	Cueva Los Laguitos, 4 Km NW Tuxtla Gutierrez	21	6	2012	781msnm	16	46	42	93	8	55	-93.1486	16.7783
CNMA IB	Leptonycteris yerbabuenae	47735	H	Chiapas	Tuxtla Gutierrez	Cueva Los Laguitos, 4 Km NW Tuxtla Gutierrez	21	6	2012	781msnm	16	46	42	93	8	55	-93.1486	16.7783
CNMA IB	Leptonycteris yerbabuenae	47736	H	Chiapas	Tuxtla Gutierrez	Cueva Los Laguitos, 4 Km NW Tuxtla Gutierrez	21	6	2012	781msnm	16	46	42	93	8	55	-93.1486	16.7783
CNMA IB	Leptonycteris yerbabuenae	47737	H	Chiapas	Tuxtla Gutierrez	Cueva Los Laguitos, 4 Km NW Tuxtla Gutierrez	21	6	2012	781msnm	16	46	42	93	8	55	-93.1486	16.7783
CNMA IB	Leptonycteris yerbabuenae	47738	H	Chiapas	Tuxtla Gutierrez	Cueva Los Laguitos, 4 Km NW Tuxtla Gutierrez	21	6	2012	781msnm	16	46	42	93	8	55	-93.1486	16.7783
CNMA IB	Leptonycteris yerbabuenae	47739	H	Chiapas	Tuxtla Gutierrez	Cueva Los Laguitos, 4 Km NW Tuxtla Gutierrez	19	8	2012	781msnm	16	46	42	93	8	55	-93.1486	16.7783
CNMA IB	Leptonycteris yerbabuenae	47740	H	Chiapas	Tuxtla Gutierrez	Cueva Los Laguitos, 4 Km NW Tuxtla Gutierrez	19	8	2012	781msnm	16	46	42	93	8	55	-93.1486	16.7783
CNMA IB	Leptonycteris yerbabuenae	47741	H	Chiapas	Tuxtla Gutierrez	Cueva Los Laguitos, 4 Km NW Tuxtla Gutierrez	19	8	2012	781msnm	16	46	42	93	8	55	-93.1486	16.7783
CNMA IB	Leptonycteris yerbabuenae	47742	H	Chiapas	Tuxtla Gutierrez	Cueva Los Laguitos, 4 Km NW Tuxtla Gutierrez	15	9	2012	781msnm	16	46	42	93	8	55	-93.1486	16.7783
CNMA IB	Leptonycteris yerbabuenae	47743	H	Chiapas	Tuxtla Gutierrez	Cueva Los Laguitos, 4 Km NW Tuxtla Gutierrez	12	6	2009	781msnm	16	46	42	93	8	55	-93.1486	16.7783
CNMA IB	Leptonycteris yerbabuenae	47744	H	Chiapas	Tuxtla Gutierrez	Cueva Los Laguitos, 4 Km NW Tuxtla Gutierrez	20	10	2012	781msnm	16	46	42	93	8	55	-93.1486	16.7783
CNMA IB	Leptonycteris yerbabuenae	47745	H	Chiapas	Tuxtla Gutierrez	Cueva Los Laguitos, 4 Km NW Tuxtla Gutierrez	20	10	2012	781msnm	16	46	42	93	8	55	-93.1486	16.7783
CNMA IB	Leptonycteris yerbabuenae	1275	M	Chiapas	Tuxtla Gutierrez	Cueva la Chepa, 4Km NW de Tuxtla Gutierrez	28	11	1950								-93.1295	16.777
CNMA IB	Leptonycteris yerbabuenae	1276	M	Chiapas	Tuxtla Gutierrez	Cueva la Chepa, 4Km NW de Tuxtla Gutierrez	28	11	1950								-93.1295	16.777
CNMA IB	Leptonycteris yerbabuenae	1277	M	Chiapas	Tuxtla Gutierrez	Cueva la Chepa, 4Km NW de Tuxtla Gutierrez	28	11	1950								-93.1295	16.777
CNMA IB	Leptonycteris yerbabuenae	1278	M	Chiapas	Tuxtla Gutierrez	Cueva la Chepa, 4Km NW de Tuxtla Gutierrez	29	11	1950								-93.1295	16.777
CNMA IB	Leptonycteris yerbabuenae	1279	M	Chiapas	Tuxtla Gutierrez	Cueva la Chepa, 4Km NW de Tuxtla Gutierrez	29	11	1950								-93.1295	16.777
CNMA IB	Leptonycteris yerbabuenae	1280	M	Chiapas	Tuxtla Gutierrez	Cueva la Chepa, 4Km NW de Tuxtla Gutierrez	29	11	1950								-93.1295	16.777
CNMA IB	Leptonycteris yerbabuenae	1281	M	Chiapas	Tuxtla Gutierrez	Cueva la Chepa, 4Km NW de Tuxtla Gutierrez	29	11	1950								-93.1295	16.777
CNMA IB	Leptonycteris yerbabuenae	1282	M	Chiapas	Tuxtla Gutierrez	Cueva la Chepa, 4Km NW de Tuxtla Gutierrez	29	11	1950								-93.1295	16.777
CNMA IB	Leptonycteris yerbabuenae	1283	H	Chiapas	Tuxtla Gutierrez	Cueva la Chepa, 4Km NW de Tuxtla Gutierrez	29	11	1950								-93.1295	16.777
CNMA IB	Leptonycteris yerbabuenae	1284	M	Chiapas	Tuxtla Gutierrez	Cueva la Chepa, 4Km NW de Tuxtla Gutierrez	29	11	1950								-93.1295	16.777
CNMA IB	Leptonycteris yerbabuenae	1285	M	Chiapas	Tuxtla Gutierrez	Cueva la Chepa, 4Km NW de Tuxtla Gutierrez	29	11	1950								-93.1295	16.777
CNMA IB	Leptonycteris yerbabuenae	1286	M	Chiapas	Tuxtla Gutierrez	Cueva la Chepa, 4Km NW de Tuxtla Gutierrez	29	11	1950								-93.1295	16.777
CNMA IB	Leptonycteris yerbabuenae	1287	M	Chiapas	Tuxtla Gutierrez	Cueva la Chepa, 4Km NW de Tuxtla Gutierrez	29	11	1950								-93.1295	16.777
CNMA IB	Leptonycteris yerbabuenae	14597	M	Chiapas	Tuxtla Gutierrez	Cueva de la Capilla 5Km SSE la Paz	26	12	1974	60							-93.0331	16.6917
CNMA IB	Leptonycteris yerbabuenae	14598	M	Chiapas	Tuxtla Gutierrez	Cueva de la Capilla 5Km SSE la Paz	26	12	1974	60							-93.0331	16.6917
CNMA IB	Leptonycteris yerbabuenae	14599	M	Chiapas	Tuxtla Gutierrez	Cueva de la Capilla 5Km SSE la Paz	26	12	1974	60							-93.0331	16.6917
CNMA IB	Leptonycteris yerbabuenae	14600	M	Chiapas	Tuxtla Gutierrez	Cueva de la Capilla 5Km SSE la Paz	26	12	1974	60							-93.0331	16.6917
CNMA IB	Leptonycteris yerbabuenae	14601	M	Chiapas	Tuxtla Gutierrez	Cueva de la Capilla 5Km SSE la Paz	26	12	1974	60							-93.0331	16.6917
CNMA IB	Leptonycteris yerbabuenae	14602	M	Chiapas	Tuxtla Gutierrez	Cueva de la Capilla 5Km SSE la Paz	26	12	1974	60							-93.0331	16.6917
CNMA IB	Leptonycteris yerbabuenae	14603	M	Chiapas	Tuxtla Gutierrez	Cueva de la Capilla 5Km SSE la Paz	26	12	1974	60							-93.0331	16.6917
ENCB IPN	Leptonycteris yerbabuenae	41405	H	Chiapas	Tuxtla Gutierrez	Cueva Los Laguitos 4 km NW Tuxtla Gutierrez	2	11	1999	730							-93.1297	16.7766
CNMA IB	Leptonycteris yerbabuenae	4729	M	Ciudad de México	Coyoacán	Ciudad Universitaria	15	2	1956		19	19	6	99	11	36	-99.1933	19.3183
CNMA IB	Leptonycteris yerbabuenae	42771	M	Ciudad de México	Coyoacán	Ciudad Universitaria	17	6	2005		19	19	6	99	11	36	-99.1933	19.3183
CNMA IB	Leptonycteris yerbabuenae	457	H	Ciudad de México	Milpa Alta	Chicomostoc, Cerro Teutli, 2.8 mi NNO Milpa Alta	8	7	1947	2620							-99.0448	19.2276
CNMA IB	Leptonycteris yerbabuenae	458	H	Ciudad de México	Milpa Alta	Chicomostoc, Cerro Teutli, 2.8 mi NNO Milpa Alta	6	7	1947	2620							-99.0448	19.2276
CNMA IB	Leptonycteris yerbabuenae	459	H	Ciudad de México	Milpa Alta	Chicomostoc, Cerro Teutli, 2.8 mi NNO Milpa Alta	6	7	1947	2620							-99.0448	19.2276
CNMA IB	Leptonycteris yerbabuenae	460	H	Ciudad de México	Milpa Alta	Chicomostoc, Cerro Teutli, 2.8 mi NNO Milpa Alta	6	7	1947	2620							-99.0448	19.2276
CNMA IB	Leptonycteris yerbabuenae	461	M	Ciudad de México	Milpa Alta	Chicomostoc, Cerro Teutli, 2.8 mi NNO Milpa Alta	6	7	1947	2620							-99.0448	19.2276
CNMA IB	Leptonycteris yerbabuenae	462	H	Ciudad de México	Milpa Alta	Chicomostoc, Cerro Teutli, 2.8 mi NNO Milpa Alta	6	7	1947	2620							-99.0448	19.2276
CNMA IB	Leptonycteris yerbabuenae	463	M	Ciudad de México	Milpa Alta	Chicomostoc, Cerro Teutli, 2.8 mi NNO Milpa Alta	8	7	1947	2620							-99.0448	19.2276
CNMA IB	Leptonycteris yerbabuenae	464	H	Ciudad de México	Milpa Alta	Chicomostoc, Cerro Teutli, 2.8 mi NNO Milpa Alta	8	7	1947	2620							-99.0448	19.2276
CNMA IB	Leptonycteris yerbabuenae	465	M	Ciudad de México	Milpa Alta	Chicomostoc, Cerro Teutli, 2.8 mi NNO Milpa Alta	8	7	1947	2620							-99.0448	19.2276
CNMA IB	Leptonycteris yerbabuenae	466	H	Ciudad de México	Milpa Alta	Chicomostoc, Cerro Teutli, 2.8 mi NNO Milpa Alta	8	7	1947	2620							-99.0448	19.2276
CNMA IB	Leptonycteris yerbabuenae	467	H	Ciudad de México	Milpa Alta	Chicomostoc, Cerro Teutli, 2.8 mi NNO Milpa Alta	8	7	1947	2620							-99.0448	19.2276
CNMA IB	Leptonycteris yerbabuenae	468	H	Ciudad de México	Milpa Alta	Chicomostoc, Cerro Teutli, 2.8 mi NNO Milpa Alta	8	7	1947	2620							-99.0448	19.2276
CNMA IB	Leptonycteris yerbabuenae	4731	H	Ciudad de México	Coyoacán	Escuela Nacional Preparatoria No 5	10	8	1958								-99.1347	19.3078
CNMA IB	Leptonycteris yerbabuenae	15471	H	Ciudad de México	Coyoacán	Jardín Botánico	6	6	1975								-99.1935	19.3196
	Leptonycteris yerbabuenae	6157	M	Colima	Pueblo Juárez	Las Juntas 26 Km W Pueblo Juárez	21	3	1962								-104.1	19.16
CNMA IB	Leptonycteris yerbabuenae	5883	M	Colima	Pueblo Juárez	El Mixcuate, 9Km W Pueblo Juárez	19	9	1961								-103.93	19.31
CNMA IB	Leptonycteris yerbabuenae	6479	M	Colima	Mixcuate	9Km Pueblo Juárez	26	9	1961	1347							-103.93	19.31
CNMA IB	Leptonycteris yerbabuenae	7466	H	Colima	Mixcuate	Colima	11	10	1961								-103.93	19.31
CNMA IB	Leptonycteris yerbabuenae	7467	H	Colima	Mixcuate	Colima	11	10	1961								-103.93	19.31
CNMA IB	Leptonycteris yerbabuenae	7468	M	Colima	Mixcuate	Colima	12	10	1961								-103.93	19.31
CNMA IB	Leptonycteris yerbabuenae	7469	M	Colima	Mixcuate	Mixcuate, Colima	15	10	1961								-103.93	19.31
CNMA IB	Leptonycteris yerbabuenae	7470	M	Colima	Mixcuate	Colima	15	10	1961								-103.93	19.31
CNMA IB	Leptonycteris yerbabuenae	7471	M	Colima	Mixcuate	Mixcuate, Colima	15	10	1961								-103.93	19.31
CNMA IB	Leptonycteris yerbabuenae	7472	M	Colima	Mixcuate	Mixcuate, Colima	16	10	1961								-103.93	19.31
CNMA IB	Leptonycteris yerbabuenae	7473	M	Colima	Mixcuate	Mixcuate, Colima	16	10	1963								-103.93	19.31
CNMA IB	Leptonycteris yerbabuenae	7474	H	Colima	Mixcuate	Mixcuate, Colima	16	10	1962								-103.93	19.31
CNMA IB	Leptonycteris yerbabuenae	7475	M	Colima	Mixcuate	Mixcuate, Colima	16	10	1961								-103.93	19.31
CNMA IB	Leptonycteris yerbabuenae	7482	M	Colima	Mixcuate	Mixcuate, Colima	24	10	1961								-103.93	19.31
CNMA IB	Leptonycteris yerbabuenae	5285	M	Colima	Mixcuate	9Km Pueblo Juárez	18	10	1960								-103.93	19.16
CNMA IB	Leptonycteris yerbabuenae	5617	H	Colima	Mixcuate	9Km Pueblo Juárez	19	10	1961								-103.93	19.16
CNMA IB	Leptonycteris yerbabuenae	5618	H	Colima	Mixcuate	9Km Pueblo Juárez	19	10	1961								-103.93	19.16
CNMA IB	Leptonycteris yerbabuenae	5619	H	Colima	Mixcuate	9Km Pueblo Juárez	19	10	1961								-103.93	19.16
CNMA IB	Leptonycteris yerbabuenae	15846	M	COLIMA		Cueva del Agua Mucha, 6 km NW La Esperanza	20	9	1997	180	19	12		103	54.83		-103.914	19
UAMI	Leptonycteris yerbabuenae	15847	M	COLIMA		Cueva del Agua Mucha, 6 km NW La Esperanza	20	9	1997	180	19	12		103	54.83		-103.914	19
UAMI	Leptonycteris yerbabuenae	15848	M	COLIMA		Cueva del Agua Mucha, 6 km NW La Esperanza	20	9	1997	180	19	12		103	54.83		-103.914	19
UAMI	Leptonycteris yerbabuenae	15849	M	COLIMA		Cueva de los Amiales, 3 km NE Jala	21	9	1997	200	19	10		103	52.01		-103.867	19.1667
UAMI	Leptonycteris yerbabuenae	15850	M	COLIMA		Cueva de los Amiales, 3 km NE Jala	21	9	1997	200	19	10		103	52.01		-103.867	19.1667
UAMI	Leptonycteris yerbabuenae	6587	M	COLIMA	Coquimatlán	3 Km S, 5 Km E Pueblo Juárez	20	8	1985	200	19	10	15	103	51	41	-103.861	19.1708
UAMI	Leptonycteris yerbabuenae	6588	M	COLIMA	Coquimatlán	3 Km S, 5 Km E Pueblo Juárez	20	8	1985	200	19	10	15	103	51	41	-103.861	19.1708
UAMI	Leptonycteris yerbabuenae	6589	M	COLIMA	Coquimatlán	3 Km S, 5 Km E Pueblo Juárez	20	8	1985	200	19	10	15	103	51	41	-103.861	19.1708
UAMI	Leptonycteris yerbabuenae	6590	M	COLIMA	Coquimatlán	3 Km S, 5 Km E Pueblo Juárez	20	8	1985	200	19	10	15	103	51	41	-103.861	19.1708
UAMI	Leptonycteris yerbabuenae	6591	M	COLIMA	Coquimatlán	3 Km S, 5 Km E Pueblo Juárez	20	8	1985	200	19	10	15	103	51	41	-103.861	19.1708
UAMI	Leptonycteris yerbabuenae	6592	M	COLIMA	Coquimatlán	3 Km S, 5 Km E Pueblo Juárez	20	8	1985	200	19	10	15	103	51	41	-103.861	19.1708
UAMI	Leptonycteris yerbabuenae	6593	M	COLIMA	Coquimatlán	3 Km S, 5 Km E Pueblo Juárez	20	8	1985	200	19	10	15	103	51	41	-103.861	19.1708
UAMI	Leptonycteris yerbabuenae	6571	M	COLIMA	Coquimatlán	3 Km E Pueblo Juárez	21	8	1985	200	19	10	0	103	51	40	-103.861	19.1667
UAMI	Leptonycteris yerbabuenae	6572	M	COLIMA	Coquimatlán	3 Km E Pueblo Juárez	21	8	1985	200	19	10	0	103	51	40	-103.861	19.1667
UAMI	Leptonycteris yerbabuenae	6573	M	COLIMA	Coquimatlán	3 Km E Pueblo Juárez	21	8	1985	200	19	10	0	103	51	40	-103.861	19.1667
UAMI	Leptonycteris yerbabuenae	6574	M	COLIMA	Coquimatlán	3 Km E Pueblo Juárez	21	8	1985	200	19	10	0	103	51	40	-103.861	19.1667
UAMI	Leptonycteris yerbabuenae	6575	M	COLIMA	Coquimatlán	3 Km E Pueblo Juárez	21	8	1985	200	19	10	0	103	51	40	-103.861	19.1667
UAMI	Leptonycteris yerbabuenae	6576	M	COLIMA	Coquimatlán	3 Km E Pueblo Juárez	21	8	1985	200	19	10	0	103	51	40	-103.861	19.1667
UAMI	Leptonycteris yerbabuenae	6577	M	COLIMA	Coquimatlán	3 Km E Pueblo Juárez	21	8	1985	200	19	10	0	103	51	40	-103.861	19.1667
UAMI	Leptonycteris yerbabuenae	6578	M	COLIMA	Coquimatlán	3 Km E Pueblo Juárez	21	8	1985	200	19	10	0	103	51	40	-103.861	19.1667
UAMI	Leptonycteris yerbabuenae	6579	M	COLIMA	Coquimatlán	3 Km E Pueblo Juárez	21	8	1985	200	19	10	0	103	51	40	-103.861	19.1667
UAMI	Leptonycteris yerbabuenae	6580	M	COLIMA	Coquimatlán	3 Km E Pueblo Juárez	21	8	1985	200	19	10	0	103	51	40	-103.861	19.1667
UAMI	Leptonycteris yerbabuenae	6581	M	COLIMA	Coquimatlán	3 Km E Pueblo Juárez	21	8	1985	200	19	10	0	103	51	40	-103.861	19.1667
UAMI	Leptonycteris yerbabuenae	6582	M	COLIMA	Coquimatlán	3 Km E Pueblo Juárez	21	8	1985	200	19	10	0	103	51	40	-103.861	19.1667
UAMI	Leptonycteris yerbabuenae	6583	M	COLIMA	Coquimatlán	3 Km E Pueblo Juárez	21	8	1985	200	19	10	0	103	51	40	-103.861	19.1667
UAMI	Leptonycteris yerbabuenae	6584	M	COLIMA	Coquimatlán	3 Km E Pueblo Juárez	21	8	1985	200	19	10	0	103	51	40	-103.861	19.1667
UAMI	Leptonycteris yerbabuenae	6585	M	COLIMA	Coquimatlán	3 Km E Pueblo Juárez	21	8	1985	200	19	10	0	103	51	40	-103.861	19.1667
UAMI	Leptonycteris yerbabuenae	6586	M	COLIMA	Coquimatlán	3 Km E Pueblo Juárez	21	8	1985	200	19	10	0	103	51	40	-103.861	19.1667
UAMI	Leptonycteris yerbabuenae	6564	M	COLIMA	Coquimatlán	2 Km N, 2 Km E Jala	23	8	1985	300	19	2	7	103	51	25	-103.857	19.0353
UAMI	Leptonycteris yerbabuenae	6565	M	COLIMA	Coquimatlán	2 Km N, 2 Km E Jala	23	8	1985	300	19	2	7	103	51	25	-103.857	19.0353
UAMI	Leptonycteris yerbabuenae	6566	M	COLIMA	Coquimatlán	2 Km N, 2 Km E Jala	23	8	1985	300	19	2	7	103	51	25	-103.857	19.0353
UAMI	Leptonycteris yerbabuenae	6567	M	COLIMA	Coquimatlán	2 Km N, 2 Km E Jala	23	8	1985	300	19	2	7	103	51	25	-103.857	19.0353
UAMI	Leptonycteris yerbabuenae	6568	M	COLIMA	Coquimatlán	2 Km N, 2 Km E Jala	23	8	1985	300	19	2	7	103	51	25	-103.857	19.0353
UAMI	Leptonycteris yerbabuenae	6569	M	COLIMA	Coquimatlán	2 Km N, 2 Km E Jala	23	8	1985	300	19	2	7	103	51	25	-103.857	19.0353
UAMI	Leptonycteris yerbabuenae	6570	M	COLIMA	Coquimatlán	2 Km N, 2 Km E Jala	23	8	1985	300	19	2	7	103	51	25	-103.857	19.0353
UAMI	Leptonycteris yerbabuenae	5620	H	Colima	Colima	Platanitos a 22 Km W Colima	19	10	1961								-103.66	19.08
CNMA IB	Leptonycteris yerbabuenae	6563	M	COLIMA	Cuahutemoc	El Cóbano	19	8	1985	720	19	18	10	103	38	40	-103.644	19.3028
UAMI	Leptonycteris yerbabuenae	5615	H	Colima	Mixcuate	9Km Pueblo Juárez	19	10	1961								-103.93	19.17
CNMA IB	Leptonycteris yerbabuenae	5616	M	Colima	Mixcuate	9Km Pueblo Juárez	19	10	1961								-103.93	19.17
CNMA IB	Leptonycteris yerbabuenae	6159	M	Colima	Pueblo Juárez	Las Juntas 26 Km W Pueblo Juárez	21	3	1962								-104.178	19.17
CNMA IB	Leptonycteris yerbabuenae	6325	M	Colima	Pueblo Juárez	Nagualapa 14 Km W Pueblo Juárez	13	4	1962								-104.063	19.1702
CNMA IB	Leptonycteris yerbabuenae	6326	M	Colima	Pueblo Juárez	Nagualapa 14 Km W Pueblo Juárez	13	4	1962								-104.063	19.1702
CNMA IB	Leptonycteris yerbabuenae	6327	M	Colima	Pueblo Juárez	Nagualapa 14 Km W Pueblo Juárez	13	4	1962								-104.063	19.1702
CNMA IB	Leptonycteris yerbabuenae	6328	M	Colima		Taberniltes, 6Km N Agua Colima	22	4	1962								-104.062	19.3562
CNMA IB	Leptonycteris yerbabuenae	6641	M	Colima	Pueblo Nuevo	Cerro Grande cerca de Pueblo Nuevo	29	10	1959								-103.721	19.2575
CNMA IB	Leptonycteris yerbabuenae	41331	H	Colima	Tecomán	El Paraíso	1	1	2000	210							-103.992	18.8752
CNMA IB	Leptonycteris yerbabuenae	41332	M	Colima	Minatitlán	2 Km NW Ranchitos	5	1	1998	1650 msnm							-103.981	19.4141
CNMA IB	Leptonycteris yerbabuenae	29141	M	Colima		6 km SW Armeria	5	4	1988	115							-104.003	18.8945
ENCB IPN	Leptonycteris yerbabuenae	29140	M	Colima		6 km SW Armeria	5	4	1988	115							-104.003	18.8945
ENCB IPN	Leptonycteris yerbabuenae	29139	M	Colima		6 km SW Armeria	5	4	1988	115							-104.003	18.8945
ENCB IPN	Leptonycteris yerbabuenae	29142	M	Colima		6 km SW Armeria	5	4	1988	115							-104.003	18.8945
ENCB IPN	Leptonycteris yerbabuenae	29143	M	Colima		6 km SW Armeria	5	4	1988	115							-104.003	18.8945
ENCB IPN	Leptonycteris yerbabuenae	29144	M	Colima		6 km SW Armeria	5	4	1988	115							-104.003	18.8945
ENCB IPN	Leptonycteris yerbabuenae	29148	M	Colima		6 km SW Armeria	6	4	1988	15							-104.003	18.8945
ENCB IPN	Leptonycteris yerbabuenae	29147	M	Colima		6 km SW Armeria	6	4	1988	15							-104.003	18.8945
ENCB IPN	Leptonycteris yerbabuenae	29146	M	Colima		6 km SW Armeria	6	4	1988	15							-104.003	18.8945
ENCB IPN	Leptonycteris yerbabuenae	29144	M	Colima		6 km SW Armeria	5	4	1988	15							-104.003	18.8945
ENCB IPN	Leptonycteris yerbabuenae	29143	M	Colima		6 km SW Armeria	5	4	1988	15							-104.003	18.8945
ENCB IPN	Leptonycteris yerbabuenae	29142	M	Colima		6 km SW Armeria	5	4	1988	15							-104.003	18.8945
ENCB IPN	Leptonycteris yerbabuenae	29141	M	Colima		6 km SW Armeria	5	4	1988	15							-104.003	18.8945
ENCB IPN	Leptonycteris yerbabuenae	29140	M	Colima		6 km SW Armeria	5	4	1988	15							-104.003	18.8945
ENCB IPN	Leptonycteris yerbabuenae	29139	M	Colima		6 km SW Armeria	5	4	1988	15							-104.003	18.8945
ENCB IPN	Leptonycteris yerbabuenae	5210	M	DISTRITO FEDERAL	Miguel Hidalgo	Panteón Dolores	99	2	1984		99	99	99	99	99	99	-100.67	100.67
UAMI	Leptonycteris yerbabuenae	15723	H	Edo. México		San Juan Temamatla	24	6	1980								-98.8721	19.2016
	Leptonycteris yerbabuenae	15722	H	Edo. México		San Juan Temamatla	24	6	1980								-98.8721	19.2016
ENCB IPN	Leptonycteris yerbabuenae	15721	H	Edo. México		San Juan Temamatla	24	6	1980								-98.8721	19.2016
ENCB IPN	Leptonycteris yerbabuenae	15720	H	Edo. México		San Juan Temamatla	24	6	1980								-98.8721	19.2016
ENCB IPN	Leptonycteris yerbabuenae	15719	M	Edo. México		San Juan Temamatla	24	6	1980								-98.8721	19.2016
ENCB IPN	Leptonycteris yerbabuenae	15718	M	Edo. México		San Juan Temamatla	24	6	1980								-98.8721	19.2016
ENCB IPN	Leptonycteris yerbabuenae	15717	M	Edo. México		San Juan Temamatla	24	6	1980								-98.8721	19.2016
ENCB IPN	Leptonycteris yerbabuenae	15310	H	Edo. México		San Juan Temamatla	24	6	1980								-98.8721	19.2016
ENCB IPN	Leptonycteris yerbabuenae	15309	M	Edo. México		San Juan Temamatla	24	6	1980								-98.8721	19.2016
ENCB IPN	Leptonycteris yerbabuenae	15308	M	Edo. México		San Juan Temamatla	24	6	1980								-98.8721	19.2016
ENCB IPN	Leptonycteris yerbabuenae	15307	M	Edo. México		San Juan Temamatla	24	6	1980								-98.8721	19.2016
ENCB IPN	Leptonycteris yerbabuenae	15306	M	Edo. México		San Juan Temamatla	24	6	1980								-98.8721	19.2016
ENCB IPN	Leptonycteris yerbabuenae	15305	H	Edo. México		San Juan Temamatla	24	6	1980								-98.8721	19.2016
ENCB IPN	Leptonycteris yerbabuenae	15304	H	Edo. México		San Juan Temamatla	24	6	1980								-98.8721	19.2016
ENCB IPN	Leptonycteris yerbabuenae	34806	M	Edo. México		Ixtapan del Oro	5	7	1989	1710							-100.266	19.2624
ENCB IPN	Leptonycteris yerbabuenae	34805	M	Edo. México		Ixtapan del Oro	5	7	1989	1710							-100.266	19.2624
ENCB IPN	Leptonycteris yerbabuenae	34804	H	Edo. México		Ixtapan del Oro	5	7	1989	1710							-100.266	19.2624
ENCB IPN	Leptonycteris yerbabuenae	34803	M	Edo. México		Ixtapan del Oro	5	7	1989	1710							-100.266	19.2624
ENCB IPN	Leptonycteris yerbabuenae	34802	H	Edo. México		Ixtapan del Oro	5	7	1989	1710							-100.266	19.2624
ENCB IPN	Leptonycteris yerbabuenae	34801	H	Edo. México		Ixtapan del Oro	5	7	1989	1710							-100.266	19.2624
ENCB IPN	Leptonycteris yerbabuenae	32871	M	Edo. México		Ixtapan del Oro	12	6	1989	1710							-100.266	19.2624
ENCB IPN	Leptonycteris yerbabuenae	32870	M	Edo. México		Ixtapan del Oro	12	6	1989	1710							-100.266	19.2624
ENCB IPN	Leptonycteris yerbabuenae	38586	M	Edo. México		Ixtapan del Oro	29	7	1994	1710							-100.266	19.2624
ENCB IPN	Leptonycteris yerbabuenae	38587	M	Edo. México		Ixtapan del Oro	29	7	1994	1710							-100.266	19.2624
ENCB IPN	Leptonycteris yerbabuenae	22693	M	Edo. México		Zumpahuacan	18	11	1985	1630							-99.5815	18.8345
ENCB IPN	Leptonycteris yerbabuenae	2670	M	Edo. México		Santa Cruz Tlapacoya	17	2	1967								-98.9071	19.3069
ENCB IPN	Leptonycteris yerbabuenae	15724	H	Edo. México		San Juan Temamatla	24	6	1980								-98.8721	19.2016
ENCB IPN	Leptonycteris yerbabuenae	34818	H	Edo. México		Ixtapan del Oro	8	8	1989	1710							-100.266	19.2624
ENCB IPN	Leptonycteris yerbabuenae	34817	M	Edo. México		Ixtapan del Oro	8	8	1989	1710							-100.266	19.2624
ENCB IPN	Leptonycteris yerbabuenae	34816	M	Edo. México		Ixtapan del Oro	8	8	1989	1710							-100.266	19.2624
ENCB IPN	Leptonycteris yerbabuenae	34815	H	Edo. México		Ixtapan del Oro	8	8	1989	1710							-100.266	19.2624
ENCB IPN	Leptonycteris yerbabuenae	34814	H	Edo. México		Ixtapan del Oro	8	8	1989	1710							-100.266	19.2624
ENCB IPN	Leptonycteris yerbabuenae	34813	H	Edo. México		Ixtapan del Oro	8	8	1989	1710							-100.266	19.2624
ENCB IPN	Leptonycteris yerbabuenae	34812	H	Edo. México		Ixtapan del Oro	5	7	1989	1710							-100.266	19.2624
ENCB IPN	Leptonycteris yerbabuenae	34811	H	Edo. México		Ixtapan del Oro	5	7	1989	1710							-100.266	19.2624
ENCB IPN	Leptonycteris yerbabuenae	34810	H	Edo. México		Ixtapan del Oro	5	7	1989	1710							-100.266	19.2624
ENCB IPN	Leptonycteris yerbabuenae	34809	M	Edo. México		Ixtapan del Oro	5	7	1989	1710							-100.266	19.2624
ENCB IPN	Leptonycteris yerbabuenae	34808	M	Edo. México		Ixtapan del Oro	5	7	1989	1710							-100.266	19.2624
ENCB IPN	Leptonycteris yerbabuenae	34807	H	Edo. México		Ixtapan del Oro	5	7	1989	1710							-100.266	19.2624
ENCB IPN	Leptonycteris yerbabuenae	7831	M	Estado de México	Tonatico	6Km SSE Tonatico	9	12	1963								-99.6462	18.7589
ENCB IPN	Leptonycteris yerbabuenae	7832	M	Estado de México	Tonatico	6Km SSE Tonatico	9	12	1963								-99.6462	18.7589
CNMA IB	Leptonycteris yerbabuenae	7833	M	Estado de México	Tonatico	6Km SSE Tonatico	9	12	1963								-99.6462	18.7589
CNMA IB	Leptonycteris yerbabuenae	7834	M	Estado de México	Tonatico	Cueva del Coyote, 3Km S Puerta de Santiago	9	11	1963								-99.6315	18.7472
CNMA IB	Leptonycteris yerbabuenae	7835	M	Estado de México	Tonatico	Cueva del Coyote, 3Km S Puerta de Santiago	9	12	1963								-99.6315	18.7472
CNMA IB	Leptonycteris yerbabuenae	7836	M	Estado de México	Tonatico	Cueva del Coyote, 3Km S Puerta de Santiago	9	12	1963								-99.6315	18.7472
CNMA IB	Leptonycteris yerbabuenae	7837	H	Estado de México	Tonatico	Cueva del Coyote, 3Km S Puerta de Santiago	9	12	1963								-99.6315	18.7472
CNMA IB	Leptonycteris yerbabuenae	7838	M	Estado de México	Tonatico	6Km SSE Tonatico	6	12	1963								-99.6315	18.7472
CNMA IB	Leptonycteris yerbabuenae	7839	M	Estado de México	Tonatico	Cueva del Coyote, 3Km S Puerta de Santiago	7	12	1963								-99.6315	18.7472
CNMA IB	Leptonycteris yerbabuenae	7840	M	Estado de México	Tonatico	Cueva del Coyote, 3Km S Puerta de Santiago	7	12	1963								-99.6315	18.7472
CNMA IB	Leptonycteris yerbabuenae	7841	M	Estado de México	Tonatico	Cueva del Coyote, 3Km S Puerta de Santiago	16	12	1963								-99.6315	18.7472
CNMA IB	Leptonycteris yerbabuenae	7842	M	Estado de México	Tonatico	Cueva del Coyote, 3Km S Puerta de Santiago	16	12	1963								-99.6315	18.7472
CNMA IB	Leptonycteris yerbabuenae	7843	M	Estado de México	Tonatico	Cueva del Coyote, 3Km S Puerta de Santiago	16	12	1963								-99.6315	18.7472
CNMA IB	Leptonycteris yerbabuenae	11343	H	Estado de México	Tultitlán		14	8	1969								-99.1622	19.6379
CNMA IB	Leptonycteris yerbabuenae	13435	M	Estado de México	Zacazonapan	Hacienda Santa María	20	1	1968								-99.5472	19.2589
CNMA IB	Leptonycteris yerbabuenae	13436	M	Estado de México	Zacazonapan	Hacienda Santa María	20	1	1968	1350							-99.5472	19.2589
CNMA IB	Leptonycteris yerbabuenae	22506	M	Estado de México	Tonatico	2km Este de Tonatico	25	5	1984								-99.6513	18.8079
CNMA IB	Leptonycteris yerbabuenae	28907	M	Estado de México	Valle de Bravo	San José del Potrero, 45 Km W de Valle de Bravo, Arroyo limítrofe con el Municipio Temazcaltepec	10	3	1985								-100.089	18.6912
CNMA IB	Leptonycteris yerbabuenae	42936	M	Guanajuato		1 km S, 0.5 km E Mineral El Realito	29	6	2003	1060							-100.209	21.5796
CNMA IB	Leptonycteris yerbabuenae	42937	M	Guanajuato		1 km S, 0.5 km E Mineral El Realito	29	6	2003	1060							-100.209	21.5796
ENCB IPN	Leptonycteris yerbabuenae	42938	M	Guanajuato		1 km S, 0.5 km E Mineral El Realito	29	6	2003	1060							-100.209	21.5796
ENCB IPN	Leptonycteris yerbabuenae	42939	M	Guanajuato		1 km S, 0.5 km E Mineral El Realito	29	6	2003	1060							-100.209	21.5796
ENCB IPN	Leptonycteris yerbabuenae	42940	M	Guanajuato		1 km S, 0.5 km E Mineral El Realito	29	6	2003	1060							-100.209	21.5796
ENCB IPN	Leptonycteris yerbabuenae	42941	M	Guanajuato		1 km S, 0.5 km E Mineral El Realito	29	6	2003	1060							-100.209	21.5796
ENCB IPN	Leptonycteris yerbabuenae	42927	H	Guanajuato		4.3 km S, 8.5 km W Mineral El Realito	3	6	2003	1100							-100.299	21.5542
ENCB IPN	Leptonycteris yerbabuenae	42928	H	Guanajuato		4.3 km S, 8.5 km W Mineral El Realito	7	6	2003	1100							-100.299	21.5542
ENCB IPN	Leptonycteris yerbabuenae	42929	H	Guanajuato		4.3 km S, 8.5 km W Mineral El Realito	8	6	2003	1100							-100.299	21.5542
ENCB IPN	Leptonycteris yerbabuenae	42932	H	Guanajuato		El Capudo, 3.2 km S, 7 km W Santa Catarina	21	9	2003								-100.137	21.1117
ENCB IPN	Leptonycteris yerbabuenae	42933	M	Guanajuato		El Capudo, 3.2 km S, 7 km W Santa Catarina	21	9	2003								-100.137	21.1117
ENCB IPN	Leptonycteris yerbabuenae	42934	M	Guanajuato		El Capudo, 3.2 km S, 7 km W Santa Catarina	21	9	2003								-100.137	21.1117
ENCB IPN	Leptonycteris yerbabuenae	42935	M	Guanajuato		El Capudo, 3.2 km S, 7 km W Santa Catarina	21	9	2003								-100.137	21.1117
ENCB IPN	Leptonycteris yerbabuenae	43592	M	Guanajuato	Tepehuaje	8.5 km S, 8.35 km E Mineral El Realito		7	2007	960							-100.138	21.5113
ENCB IPN	Leptonycteris yerbabuenae	42943	M	Guanajuato		1 km S, 0.5 km E Mineral El Realito	29	6	2003	1060							-100.219	21.5841
ENCB IPN	Leptonycteris yerbabuenae	42942	M	Guanajuato		1 km S, 0.5 km E Mineral El Realito	29	6	2003	1060							-100.219	21.5841
ENCB IPN	Leptonycteris yerbabuenae	11790	M	Guerreo	Teloloapan	8Km SW de Teloloapan	23	3	1970	1300							-99	18.31
ENCB IPN
CNMA IB	Leptonycteris yerbabuenae	12605	M	Guerrero	Tecpan de Galeana	58 Km NW po carretera Tecpan de Galeana, Morro de las Animas	6	6	1971	4							-101.04	17.32
	Leptonycteris yerbabuenae	12606	M	Guerrero	Tecpan de Galeana	59 Km NW po carretera Tecpan de Galeana, Morro de las Animas	6	6	1971	4							-101.04	17.32
CNMA IB	Leptonycteris yerbabuenae	12607	M	Guerrero	Tecpan de Galeana	63 Km NW po carretera Tecpan de Galeana, Morro de las Animas	6	7	1971								-101.04	17.32
CNMA IB	Leptonycteris yerbabuenae	12608	M	Guerrero	Tecpan de Galeana	64 Km NW po carretera Tecpan de Galeana, Morro de las Animas	6	7	1971								-101.04	17.32
CNMA IB	Leptonycteris yerbabuenae	12609	M	Guerrero	Tecpan de Galeana	65 Km NW po carretera Tecpan de Galeana, Morro de las Animas	6	7	1971								-101.04	17.32
CNMA IB	Leptonycteris yerbabuenae	12610	M	Guerrero	Tecpan de Galeana	66 Km NW po carretera Tecpan de Galeana, Morro de las Animas	6	7	1971								-101.04	17.32
CNMA IB	Leptonycteris yerbabuenae	12611	M	Guerrero	Tecpan de Galeana	67 Km NW po carretera Tecpan de Galeana, Morro de las Animas	6	7	1971								-101.04	17.32
CNMA IB	Leptonycteris yerbabuenae	12612	M	Guerrero	Tecpan de Galeana	68 Km NW po carretera Tecpan de Galeana, Morro de las Animas	6	7	1971								-101.04	17.32
CNMA IB	Leptonycteris yerbabuenae	12613	M	Guerrero	Tecpan de Galeana	58 Km NW po carretera Tecpan de Galeana, Morro de las Animas	6	7	71	4							-101.04	17.32
CNMA IB	Leptonycteris yerbabuenae	12614	M	Guerrero	Tecpan de Galeana	59 Km NW po carretera Tecpan de Galeana, Morro de las Animas	6	7	71								-101.04	17.32
CNMA IB	Leptonycteris yerbabuenae	12615	M	Guerrero	Tecpan de Galeana	2Km SW de Tecpan de Galeana	5	6	1971	120							-101.04	17.32
CNMA IB	Leptonycteris yerbabuenae	12856	M	Guerrero	Tecpan de Galeana	83 Km NW po carretera Tecpan de Galeana, Morro de las Animas	11	11	1971								-101.04	17.32
CNMA IB	Leptonycteris yerbabuenae	12857	M	Guerrero	Tecpan de Galeana	84 Km NW po carretera Tecpan de Galeana, Morro de las Animas	11	11	1971								-101.04	17.32
CNMA IB	Leptonycteris yerbabuenae	12858	M	Guerrero	Tecpan de Galeana	61 Km NW po carretera Tecpan de Galeana, Morro de las Animas	11	11	1971								-101.04	17.32
CNMA IB	Leptonycteris yerbabuenae	12860	M	Guerrero	Tecpan de Galeana	62 Km NW po carretera Tecpan de Galeana, Morro de las Animas	11	11	1971								-101.04	17.32
CNMA IB	Leptonycteris yerbabuenae	12861	M	Guerrero	Tecpan de Galeana	60 Km NW po carretera Tecpan de Galeana, Morro de las Animas	11	11	1971								-101.04	17.32
CNMA IB	Leptonycteris yerbabuenae	12862	M	Guerrero	Tecpan de Galeana	76 Km NW po carretera Tecpan de Galeana, Morro de las Animas	11	11	1971								-101.04	17.32
CNMA IB	Leptonycteris yerbabuenae	12863	M	Guerrero	Tecpan de Galeana	77 Km NW po carretera Tecpan de Galeana, Morro de las Animas	11	11	1971								-101.04	17.32
CNMA IB	Leptonycteris yerbabuenae	12864	H	Guerrero	Tecpan de Galeana	78 Km NW po carretera Tecpan de Galeana, Morro de las Animas	11	11	1971								-101.04	17.32
CNMA IB	Leptonycteris yerbabuenae	12865	H	Guerrero	Tecpan de Galeana	79 Km NW po carretera Tecpan de Galeana, Morro de las Animas	11	11	1971								-101.04	17.32
CNMA IB	Leptonycteris yerbabuenae	12866	M	Guerrero	Tecpan de Galeana	80 Km NW po carretera Tecpan de Galeana, Morro de las Animas	11	11	1971								-101.04	17.32
CNMA IB	Leptonycteris yerbabuenae	12867	M	Guerrero	Tecpan de Galeana	81 Km NW po carretera Tecpan de Galeana, Morro de las Animas	11	11	1971								-101.04	17.32
CNMA IB	Leptonycteris yerbabuenae	12868	M	Guerrero	Tecpan de Galeana	82 Km NW po carretera Tecpan de Galeana, Morro de las Animas	11	11	1971								-101.04	17.32
CNMA IB	Leptonycteris yerbabuenae	12869	M	Guerrero	Tecpan de Galeana	69 Km NW po carretera Tecpan de Galeana, Morro de las Animas	11	11	1971								-101.04	17.32
CNMA IB	Leptonycteris yerbabuenae	12870	M	Guerrero	Tecpan de Galeana	70 Km NW po carretera Tecpan de Galeana, Morro de las Animas	11	11	1971								-101.04	17.32
CNMA IB	Leptonycteris yerbabuenae	12871	M	Guerrero	Tecpan de Galeana	71 Km NW po carretera Tecpan de Galeana, Morro de las Animas	11	11	1971								-101.04	17.32
CNMA IB	Leptonycteris yerbabuenae	12872	M	Guerrero	Tecpan de Galeana	72 Km NW po carretera Tecpan de Galeana, Morro de las Animas	11	11	1971								-101.04	17.32
CNMA IB	Leptonycteris yerbabuenae	12873	M	Guerrero	Tecpan de Galeana	73 Km NW po carretera Tecpan de Galeana, Morro de las Animas	11	11	1971								-101.04	17.32
CNMA IB	Leptonycteris yerbabuenae	12874	H	Guerrero	Tecpan de Galeana	74 Km NW po carretera Tecpan de Galeana, Morro de las Animas	11	11	1971								-101.04	17.32
CNMA IB	Leptonycteris yerbabuenae	12875	M	Guerrero	Tecpan de Galeana	75 Km NW po carretera Tecpan de Galeana, Morro de las Animas	11	11	1971								-101.04	17.32
CNMA IB	Leptonycteris yerbabuenae	12876	M	Guerrero	Tecpan de Galeana	Morro de las Animas, 58 Km NW	11	11	1971								-101.04	17.32
CNMA IB	Leptonycteris yerbabuenae	12877	M	Guerrero	Tecpan de Galeana	Morro de las Animas, 58 Km NW	11	11	1971								-101.04	17.32
CNMA IB	Leptonycteris yerbabuenae	12878	M	Guerrero	Tecpan de Galeana	Morro de las Animas, 58 Km NW	11	11	1971								-101.04	17.32
CNMA IB	Leptonycteris yerbabuenae	12879	M	Guerrero	Tecpan de Galeana	Morro de las Animas, 58 Km NW	11	11	1971								-101.04	17.32
CNMA IB	Leptonycteris yerbabuenae	12918	H	Guerrero	Tecpan de Galeana	Morro de las Animas, 58 Km NW	12	11	1971								-101	17.26
CNMA IB	Leptonycteris yerbabuenae	13035	M	Guerrero	Tenexpa		25	2	1972	120							-100	17.18
CNMA IB	Leptonycteris yerbabuenae	30053	H	Guerrero	Poliuta	San José Poliuta	1	10	1976	290							-100.39	18.26
CNMA IB	Leptonycteris yerbabuenae	30054	M	Guerrero	Poliuta	San José Poliuta	24	11	1976								-100.39	18.26
CNMA IB	Leptonycteris yerbabuenae	30055	H	Guerrero	Poliuta	San José Poliuta	25	1	1977								-100.39	18.26
CNMA IB	Leptonycteris yerbabuenae	30056	H	Guerrero	Poliuta	San José Poliuta	28	1	1977								-100.39	18.26
CNMA IB	Leptonycteris yerbabuenae	30057	M	Guerrero	Poliuta	San José Poliuta	31	3	1977	290							-100.39	18.26
CNMA IB	Leptonycteris yerbabuenae	30058	H	Guerrero	Poliuta	San José Poliuta	30	6	1977								-100.39	18.26
CNMA IB	Leptonycteris yerbabuenae	30059	H	Guerrero	Poliuta	San José Poliuta	27	6	1977	290							-100.39	18.26
CNMA IB	Leptonycteris yerbabuenae	30060	M	Guerrero	Poliuta	San José Poliuta	21	6	1977	290							-100.39	18.26
CNMA IB	Leptonycteris yerbabuenae	30061	M	Guerrero	Poliuta	San José Poliuta	3	5	1977	290							-100.39	18.26
CNMA IB	Leptonycteris yerbabuenae	46251	H	Guerrero	Coyuca de Benítez	2.77Km SSW, Yetta.	2	12	2008	16	16	58	19.9	100	0	54.4	-100.015	16.9722
CNMA IB	Leptonycteris yerbabuenae	12194	H	Guerrero	Teloloapan	Cueva del Fraile 14 Km SW Teloloapan	5	2	1970								-99.97	18.27
CNMA IB	Leptonycteris yerbabuenae	11792	H	Guerrero	Teloloapan	Cueva de la Cruz, 6Km S Teloloapan	24	3	1970	1400							-99	18.31
CNMA IB	Leptonycteris yerbabuenae	11793	H	Guerrero	Teloloapan	Cueva de la Cruz, 6Km S Teloloapan	24	3	1970	1400							-99	18.31
CNMA IB	Leptonycteris yerbabuenae	11794	H	Guerrero	Teloloapan	Cueva de la Cruz, 6Km S Teloloapan	24	3	1970	1400							-99	18.31
CNMA IB	Leptonycteris yerbabuenae	11796	M	Guerrero	Teloloapan	Cueva de la Cruz, 6Km S Teloloapan	24	3	1970	1400							-99	18.31
CNMA IB	Leptonycteris yerbabuenae	11797	M	Guerrero	Teloloapan	Cueva de la Cruz, 6Km S Teloloapan	24	3	1970	1400							-99	18.31
CNMA IB	Leptonycteris yerbabuenae	11798	M	Guerrero	Teloloapan	Cueva de la Cruz, 6Km S Teloloapan	24	3	1970	1400							-99	18.31
CNMA IB	Leptonycteris yerbabuenae	8832	H	Guerrero	Teloloapan	Arroyo de Alcholoya, 7.3Km N de Teloloapan	27	2	1965	1481							-99.87	18.4
CNMA IB	Leptonycteris yerbabuenae	8834	M	Guerrero	Teloloapan	Arroyo de Alcholoya, 7.3Km N de Teloloapan	27	2	1965	1482							-99.87	18.4
CNMA IB	Leptonycteris yerbabuenae	8835	M	Guerrero	Teloloapan	Arroyo de Alcholoya, 7.3Km N de Teloloapan	27	2	1965								-99.87	18.4
CNMA IB	Leptonycteris yerbabuenae	8836	H	Guerrero	Mexicapan	Ojo de Agua de Mexicapán, 4.3 Km N de Teloloapan	27	2	1965								-99.87	18.4
CNMA IB	Leptonycteris yerbabuenae	8837	M	Guerrero	Mexicapan	Ojo de Agua de Mexicapán, 4.3 Km N de Teloloapan	27	2	1965								-99.87	18.4
CNMA IB	Leptonycteris yerbabuenae	8838	M	Guerrero	Mexicapan	Ojo de Agua de Mexicapán, 4.3 Km N de Teloloapan	27	2	1965								-99.87	18.4
CNMA IB	Leptonycteris yerbabuenae	8839	M	Guerrero	Mexicapan	Ojo de Agua de Mexicapán, 4.3 Km N de Teloloapan	27	2	1965								-99.87	18.4
CNMA IB	Leptonycteris yerbabuenae	8840	H	Guerrero	Mexicapan	Ojo de Agua de Mexicapán, 4.3 Km N de Teloloapan	27	2	1965								-99.87	18.4
CNMA IB	Leptonycteris yerbabuenae	8841	H	Guerrero	Mexicapan	Ojo de Agua de Mexicapán, 4.3 Km N de Teloloapan	27	2	1965								-99.87	18.4
CNMA IB	Leptonycteris yerbabuenae	8842	M	Guerrero	Mexicapan	Ojo de Agua de Mexicapán, 4.3 Km N de Teloloapan	27	2	1965	1480							-99.87	18.4
CNMA IB	Leptonycteris yerbabuenae	8843	M	Guerrero	Mexicapan	Ojo de Agua de Mexicapán, 4.3 Km N de Teloloapan	27	2	1965	1480							-99.87	18.4
CNMA IB	Leptonycteris yerbabuenae	8844	H	Guerrero	Mexicapan	Ojo de Agua de Mexicapán, 4.3 Km N de Teloloapan	27	2	1965	1480							-99.87	18.4
CNMA IB	Leptonycteris yerbabuenae	8845	H	Guerrero	Mexicapan	Ojo de Agua de Mexicapán, 4.3 Km N de Teloloapan	27	2	1965	1480							-99.87	18.4
CNMA IB	Leptonycteris yerbabuenae	9111	M	Guerrero	Teloloapan	Arroyo de Alcholoya, 7.3Km N de Teloloapan	27	2	1965	1480							-99.87	18.43
CNMA IB	Leptonycteris yerbabuenae	11791	H	Guerrero	Teloloapan	Cueva de la Cruz, 6Km S Teloloapan	24	3	1970	1400							-99.87	18.31
CNMA IB	Leptonycteris yerbabuenae	11799	M	Guerrero	Teloloapan	Cueva de la Cruz, 6Km S Teloloapan	24	3	1970	1400							-99.87	18.31
CNMA IB	Leptonycteris yerbabuenae	11800	M	Guerrero	Teloloapan	Cueva de la Cruz, 6Km S Teloloapan	24	3	1970	1400							-99.87	18.31
CNMA IB	Leptonycteris yerbabuenae	24804	M	Guerrero	Acapulco	Vivero "El Huayacan", La Paz	16	3	1986								-99.8	16.82
CNMA IB	Leptonycteris yerbabuenae	24805	M	Guerrero	Acapulco	Vivero "El Huayacan", La Paz	16	3	1986								-99.8	16.82
CNMA IB	Leptonycteris yerbabuenae	24806	M	Guerrero	Acapulco	Vivero "El Huayacan", La Paz	16	3	1986								-99.8	16.82
CNMA IB	Leptonycteris yerbabuenae	34416	M	Guerrero	Acapulco	Vivero "El Huayacan", La Paz	28	3	1978								-99.8	16.82
CNMA IB	Leptonycteris yerbabuenae	34417	M	Guerrero	Acapulco	Vivero "El Huayacan", La Paz	28	3	1978								-99.8	16.82
CNMA IB	Leptonycteris yerbabuenae	34418	M	Guerrero	Acapulco	Vivero "El Huayacan", La Paz	28	3	1978								-99.8	16.82
CNMA IB	Leptonycteris yerbabuenae	34419	M	Guerrero	Acapulco	Vivero "El Huayacan", La Paz	28	3	1978								-99.8	16.82
CNMA IB	Leptonycteris yerbabuenae	34420	M	Guerrero	Acapulco	Vivero "El Huayacan", La Paz	28	3	1978								-99.8	16.82
CNMA IB	Leptonycteris yerbabuenae	34421	M	Guerrero	Acapulco	Vivero "El Huayacan", La Paz	28	3	1978								-99.8	16.82
CNMA IB	Leptonycteris yerbabuenae	34422	M	Guerrero	Acapulco	Vivero "El Huayacan", La Paz	19	3	1978								-99.8	16.82
CNMA IB	Leptonycteris yerbabuenae	34423	M	Guerrero	Acapulco	Vivero "El Huayacan", La Paz	19	3	1978								-99.8	16.82
CNMA IB	Leptonycteris yerbabuenae	34424	M	Guerrero	Acapulco	Vivero "El Huayacan", La Paz	19	3	1978								-99.8	16.82
CNMA IB	Leptonycteris yerbabuenae	34425	M	Guerrero	Acapulco	Vivero "El Huayacan", La Paz	19	3	1978								-99.8	16.82
CNMA IB	Leptonycteris yerbabuenae	34426	M	Guerrero	Acapulco	Vivero "El Huayacan", La Paz	19	3	1978								-99.8	16.82
CNMA IB	Leptonycteris yerbabuenae	34428	M	Guerrero	Acapulco	Vivero "El Huayacan", La Paz	19	3	1978								-99.8	16.82
CNMA IB	Leptonycteris yerbabuenae	34429	M	Guerrero	Acapulco	Vivero "El Huayacan", La Paz	11	9	1979								-99.8	16.82
CNMA IB	Leptonycteris yerbabuenae	34430	M	Guerrero	Acapulco	Vivero "El Huayacan", La Paz	15	9	1979								-99.8	16.82
CNMA IB	Leptonycteris yerbabuenae	10049	H	Guerrero		7Km N Balsas	17	12	1966	700							-99.77	18.06
CNMA IB	Leptonycteris yerbabuenae	29515	H	Guerrero	Palo Blanco	Cueva "El Huarache", Km 25.6 Chilpancingo-Acapulco	1	12	1985	900							-99.42	17.38
CNMA IB	Leptonycteris yerbabuenae	30063	M	Guerrero	Palo Blanco	Cueva "El Huarache", Km 25.6 Chilpancingo-Acapulco	1	12	1985	900							-99.42	17.38
CNMA IB	Leptonycteris yerbabuenae	30064	H	Guerrero	Palo Blanco	Cueva "El Huarache", Km 25.6 Chilpancingo-Acapulco	1	12	1985	900							-99.42	17.38
CNMA IB	Leptonycteris yerbabuenae	30065	H	Guerrero	Palo Blanco	Cueva "El Huarache", Km 25.6 Chilpancingo-Acapulco	1	12	1985	900							-99.42	17.38
CNMA IB	Leptonycteris yerbabuenae	10272	M	GUERRERO	Quechultenango	4 Km NE Colotlipa	29	3	1970	1100	17	48	45	99	20	10	-99.3361	17.81
CNMA IB	Leptonycteris yerbabuenae	10273	H	GUERRERO	Quechultenango	4 Km NE Colotlipa	29	3	1970	1100	17	48	45	99	20	10	-99.3361	17.81
UAMI	Leptonycteris yerbabuenae	3710	H	Guerrero	Colotlipa	Grutas Juxtlahuaca, 5 Km N Colotipla	27	8	1982								-99.16	17.44
UAMI	Leptonycteris yerbabuenae	30062	M	Guerrero	Colotlipa	Grutas Juxtlahuaca, 5 Km N Colotipla	10	6	1964	800							-99.16	17.4
CNMA IB	Leptonycteris yerbabuenae	1292	H	Guerrero	Colotlipa	Cueva de Juxtlahuaca	15	4	1949								-99.1594	17.4393
CNMA IB	Leptonycteris yerbabuenae	9970	M	Guerrero	Mexicapan	Ojo de Agua de Mexicapán, 4.3 Km N de Teloloapan	26	11	1966	1480							-99.8695	18.4029
CNMA IB	Leptonycteris yerbabuenae	9980	H	Guerrero	Mexicapan	Ojo de Agua de Mexicapán, 4.3 Km N de Teloloapan	26	11	1966	1480							-99.8695	18.4029
CNMA IB	Leptonycteris yerbabuenae	18590	M	Guerrero	Teloloapan	Tingambato	15	7	1981								-101.853	19.496
CNMA IB	Leptonycteris yerbabuenae	18591	M	Guerrero	Teloloapan	Tingambato	15	7	1981								-101.853	19.496
CNMA IB	Leptonycteris yerbabuenae	18592	M	Guerrero	Teloloapan	Tingambato	15	7	1981								-101.853	19.496
CNMA IB	Leptonycteris yerbabuenae	18593	H	Guerrero	Teloloapan	Tingambato	15	7	1981								-101.853	19.496
CNMA IB	Leptonycteris yerbabuenae	34927	M	Guerrero	Acapulco	Vivero "El Huayacan", La Paz	19	3	1978								-99.8474	16.9181
CNMA IB	Leptonycteris yerbabuenae	38098	M	Guerrero		Acapulco	7	10	1993								-99.8235	16.8478
CNMA IB	Leptonycteris yerbabuenae	38097	M	Guerrero		Acapulco	7	10	1993								-99.8235	16.8478
ENCB IPN	Leptonycteris yerbabuenae	38096	H	Guerrero		Acapulco	7	10	1993								-99.8235	16.8478
ENCB IPN	Leptonycteris yerbabuenae	38095	H	Guerrero		Acapulco	7	10	1993								-99.8235	16.8478
ENCB IPN	Leptonycteris yerbabuenae	671	H	Guerrero		Cueva Juxtlahuaca	14	4	1963								-99.1593	17.4364
ENCB IPN	Leptonycteris yerbabuenae	16135	M	Guerrero	Colotlipa	Grutas Juxtlahuaca 4 km NE	14	2	1980	1100							-99.1593	17.4364
ENCB IPN	Leptonycteris yerbabuenae	16134	H	Guerrero	Colotlipa	Grutas Juxtlahuaca 4 km NE	14	2	1980	1100							-99.1593	17.4364
ENCB IPN	Leptonycteris yerbabuenae	16133	H	Guerrero	Colotlipa	Grutas Juxtlahuaca 4 km NE	14	2	1980	1100							-99.1593	17.4364
ENCB IPN	Leptonycteris yerbabuenae	38567	H	Guerrero	Colotlipa	Grutas Juxtlahuaca 4 km NE	30	1	1995	1100							-99.1593	17.4364
ENCB IPN	Leptonycteris yerbabuenae	38566	H	Guerrero	Colotlipa	Grutas Juxtlahuaca 4 km NE	30	1	1995	1100							-99.1593	17.4364
ENCB IPN	Leptonycteris yerbabuenae	3608	H	Guerrero	Colotlipa	Grutas Juxtlahuaca 4 km NE	4	2	1968	1100							-99.1593	17.4364
ENCB IPN	Leptonycteris yerbabuenae	3607	H	Guerrero	Colotlipa	Grutas Juxtlahuaca 4 km NE	4	2	1968	1100							-99.1593	17.4364
ENCB IPN	Leptonycteris yerbabuenae	3606	H	Guerrero	Colotlipa	Grutas Juxtlahuaca 4 km NE	4	2	1968	1100							-99.1593	17.4364
ENCB IPN	Leptonycteris yerbabuenae	3605	H	Guerrero	Colotlipa	Grutas Juxtlahuaca 4 km NE	4	2	1968	1100							-99.1593	17.4364
ENCB IPN	Leptonycteris yerbabuenae	3604	H	Guerrero	Colotlipa	Grutas Juxtlahuaca 4 km NE	4	2	1968	1100							-99.1593	17.4364
ENCB IPN	Leptonycteris yerbabuenae	3603	H	Guerrero	Colotlipa	Grutas Juxtlahuaca 4 km NE	4	2	1968	1100							-99.1593	17.4364
ENCB IPN	Leptonycteris yerbabuenae	16144	Indefinido	Guerrero	Colotlipa	Grutas Juxtlahuaca 4 km NE	16	12	1979	1100							-99.1593	17.4364
ENCB IPN	Leptonycteris yerbabuenae	16143	H Lactante	Guerrero	Colotlipa	Grutas Juxtlahuaca 4 km NE	15	12	1979	1100							-99.1593	17.4364
ENCB IPN	Leptonycteris yerbabuenae	16142	Indefinido	Guerrero	Colotlipa	Grutas Juxtlahuaca 4 km NE	15	12	1979	1100							-99.1593	17.4364
ENCB IPN	Leptonycteris yerbabuenae	16141	H Lactante	Guerrero	Colotlipa	Grutas Juxtlahuaca 4 km NE	14	2	1980	1100							-99.1593	17.4364
ENCB IPN	Leptonycteris yerbabuenae	3874	M	Guerrero	Colotlipa	4 km NE Colotlipa	21	7	1968	1100							-99.1394	17.4341
ENCB IPN	Leptonycteris yerbabuenae	3873	M	Guerrero	Colotlipa	4 km NE Colotlipa	21	7	1968	1100							-99.1394	17.4341
ENCB IPN	Leptonycteris yerbabuenae	3872	M	Guerrero	Colotlipa	4 km NE Colotlipa	21	7	1968	1100							-99.1394	17.4341
ENCB IPN	Leptonycteris yerbabuenae	3865	M	Guerrero	Colotlipa	4 km NE Colotlipa	21	7	1968	1100							-99.1394	17.4341
ENCB IPN	Leptonycteris yerbabuenae	3864	M	Guerrero	Colotlipa	4 km NE Colotlipa	21	7	1968	1100							-99.1394	17.4341
ENCB IPN	Leptonycteris yerbabuenae	3863	M	Guerrero	Colotlipa	4 km NE Colotlipa	21	7	1968	1100							-99.1394	17.4341
ENCB IPN	Leptonycteris yerbabuenae	3862	M	Guerrero	Colotlipa	4 km NE Colotlipa	21	7	1968	1100							-99.1394	17.4341
ENCB IPN	Leptonycteris yerbabuenae	3861	M	Guerrero	Colotlipa	4 km NE Colotlipa	21	7	1968	1100							-99.1394	17.4341
ENCB IPN	Leptonycteris yerbabuenae	2839	H	Guerrero	Cocula		20	4	1967								-99.6605	18.2377
ENCB IPN	Leptonycteris yerbabuenae	3197	M	Guerrero	Cocula		1	9	1967								-99.6605	18.2377
ENCB IPN	Leptonycteris yerbabuenae	3860	M	Guerrero	Colotlipa		20	7	1968								-99.1662	17.4087
ENCB IPN	Leptonycteris yerbabuenae	3859	H	Guerrero	Colotlipa		20	7	1968								-99.1662	17.4087
ENCB IPN	Leptonycteris yerbabuenae	16146	H	Guerrero	Colotlipa	Grutas Juxtlahuaca 4 km NE	14	2	1980	1100							-99.1593	17.4364
ENCB IPN	Leptonycteris yerbabuenae	16145	M	Guerrero	Colotlipa	Grutas Juxtlahuaca 4 km NE	16	12	1979	1100							-99.1593	17.4364
ENCB IPN	Leptonycteris yerbabuenae	3871	M	Guerrero		4 km NE Colotlipa	21	7	1968	1100							-99.1394	17.4341
ENCB IPN	Leptonycteris yerbabuenae	3870	M	Guerrero		4 km NE Colotlipa	21	7	1968	1100							-99.1394	17.4341
ENCB IPN	Leptonycteris yerbabuenae	3869	H	Guerrero		4 km NE Colotlipa	21	7	1968	1100							-99.1394	17.4341
ENCB IPN	Leptonycteris yerbabuenae	3868	M	Guerrero		4 km NE Colotlipa	21	7	1968	1100							-99.1394	17.4341
ENCB IPN	Leptonycteris yerbabuenae	3867	M	Guerrero		4 km NE Colotlipa	21	7	1968	1100							-99.1394	17.4341
ENCB IPN	Leptonycteris yerbabuenae	3866	H	Guerrero		4 km NE Colotlipa	21	7	1968	1100							-99.1394	17.4341
ENCB IPN	Leptonycteris yerbabuenae	41433	H	Guerrero	Teloloapan	Cueva "Tierra Azul" 0.5 km N, 1.5 km W Yerbabuena	2	10	1999	1790							-99.8996	18.4678
ENCB IPN	Leptonycteris yerbabuenae	38695	M	Guerrero	Zihuatanejo	Playa Larga 5.3 km N, 9.6 km W	5	8	1995	2							-101.592	17.713
ENCB IPN	Leptonycteris yerbabuenae	38694	M	Guerrero	Zihuatanejo	Playa Larga 5.3 km N, 9.6 km W	5	8	1995	2							-101.592	17.713
ENCB IPN	Leptonycteris yerbabuenae	38693	H	Guerrero	Zihuatanejo	Playa Larga 5.3 km N, 9.6 km W	5	8	1995	2							-101.592	17.713
ENCB IPN	Leptonycteris yerbabuenae	35474	H no emb	Guerrero		1 km N, 3.5 km E Petacalco	11	3	1991	15							-102.074	17.988
ENCB IPN	Leptonycteris yerbabuenae	35911	H	Guerrero		3.5 km N, 7.5 km E Petacalco	23	5	1991								-102.037	18.0102
ENCB IPN	Leptonycteris yerbabuenae	35910	H	Guerrero		3.5 km N, 7.5 km E Petacalco	23	5	1991								-102.037	18.0102
ENCB IPN	Leptonycteris yerbabuenae	13488	H	Guerrero		1.1 km N, 0.8 km E, Petacalco	20	5	1978	60							-102.107	17.9877
ENCB IPN	Leptonycteris yerbabuenae	13487	M	Guerrero		1.1 km N, 0.8 km E, Petacalco	20	5	1978	60							-102.107	17.9877
ENCB IPN	Leptonycteris yerbabuenae	3590	H	Guerrero		4 km NE Colotlipa	4	2	1968	1100							-99.1395	17.4342
ENCB IPN	Leptonycteris yerbabuenae	3589	H	Guerrero		4 km NE Colotlipa	4	2	1968	1100							-99.1395	17.4342
ENCB IPN	Leptonycteris yerbabuenae	3588	H	Guerrero		4 km NE Colotlipa	4	2	1968	1100							-99.1395	17.4342
ENCB IPN	Leptonycteris yerbabuenae	3587	H	Guerrero		4 km NE Colotlipa	4	2	1968	1100							-99.1395	17.4342
ENCB IPN	Leptonycteris yerbabuenae	3586	H	Guerrero		4 km NE Colotlipa	4	2	1968	1100							-99.1395	17.4342
ENCB IPN	Leptonycteris yerbabuenae	3585	H	Guerrero		4 km NE Colotlipa	4	2	1968	1100							-99.1395	17.4342
ENCB IPN	Leptonycteris yerbabuenae	3584	H	Guerrero		4 km NE Colotlipa	4	2	1968	1100							-99.1395	17.4342
ENCB IPN	Leptonycteris yerbabuenae	3583	H	Guerrero		4 km NE Colotlipa	4	2	1968	1100							-99.1395	17.4342
ENCB IPN	Leptonycteris yerbabuenae	3582	H	Guerrero		4 km NE Colotlipa	4	2	1968	1100							-99.1395	17.4342
ENCB IPN	Leptonycteris yerbabuenae	3581	H	Guerrero		4 km NE Colotlipa	4	2	1968	1100							-99.1395	17.4342
ENCB IPN	Leptonycteris yerbabuenae	3580	H	Guerrero		4 km NE Colotlipa	4	2	1968	1100							-99.1395	17.4342
ENCB IPN	Leptonycteris yerbabuenae	3579	H	Guerrero		4 km NE Colotlipa	4	2	1968	1100							-99.1395	17.4342
ENCB IPN	Leptonycteris yerbabuenae	3602	H	Guerrero		4 km NE Colotlipa	4	2	1968	1100							-99.1395	17.4342
ENCB IPN	Leptonycteris yerbabuenae	3601	H	Guerrero		4 km NE Colotlipa	4	2	1968	1100							-99.1395	17.4342
ENCB IPN	Leptonycteris yerbabuenae	3600	H	Guerrero		4 km NE Colotlipa	4	2	1968	1100							-99.1395	17.4342
ENCB IPN	Leptonycteris yerbabuenae	3599	H	Guerrero		4 km NE Colotlipa	4	2	1968	1100							-99.1395	17.4342
ENCB IPN	Leptonycteris yerbabuenae	3598	H	Guerrero		4 km NE Colotlipa	4	2	1968	1100							-99.1395	17.4342
ENCB IPN	Leptonycteris yerbabuenae	3597	H	Guerrero		4 km NE Colotlipa	4	2	1968	1100							-99.1395	17.4342
ENCB IPN	Leptonycteris yerbabuenae	3596	H	Guerrero		4 km NE Colotlipa	4	2	1968	1100							-99.1395	17.4342
ENCB IPN	Leptonycteris yerbabuenae	3595	H	Guerrero		4 km NE Colotlipa	4	2	1968	1100							-99.1395	17.4342
ENCB IPN	Leptonycteris yerbabuenae	3594	H	Guerrero		4 km NE Colotlipa	4	2	1968	1100							-99.1395	17.4342
ENCB IPN	Leptonycteris yerbabuenae	3593	H	Guerrero		4 km NE Colotlipa	4	2	1968	1100							-99.1395	17.4342
ENCB IPN	Leptonycteris yerbabuenae	3592	H	Guerrero		4 km NE Colotlipa	4	2	1968	1100							-99.1395	17.4342
ENCB IPN	Leptonycteris yerbabuenae	3591	H	Guerrero		4 km NE Colotlipa	4	2	1968	1100							-99.1395	17.4342
ENCB IPN	Leptonycteris yerbabuenae	29516	H	Hidalgo	Santiago de Anaya	Grutas de Xoxafi, 6 Km N Lagunillas	15	4	1978								-99.31	21.13
ENCB IPN	Leptonycteris yerbabuenae	29517	M	Hidalgo	Santiago de Anaya	Grutas de Xoxafi, 6 Km N Lagunillas	15	4	1978								-99.31	21.13
CNMA IB	Leptonycteris yerbabuenae	29518	M	Hidalgo	Santiago de Anaya	Grutas de Xoxafi, 6 Km N Lagunillas	15	4	1978								-99.31	21.13
CNMA IB	Leptonycteris yerbabuenae	29520	M	Hidalgo	Santiago de Anaya	Grutas de Xoxafi, 6 Km N Lagunillas	15	4	1978								-99.31	21.13
CNMA IB	Leptonycteris yerbabuenae	29521	M	Hidalgo	Santiago de Anaya	Grutas de Xoxafi, 6 Km N Lagunillas	15	4	1978								-99.31	21.13
CNMA IB	Leptonycteris yerbabuenae	29522	M	Hidalgo	Santiago de Anaya	Grutas de Xoxafi, 6 Km N Lagunillas	15	4	1978								-99.31	21.13
CNMA IB	Leptonycteris yerbabuenae	29523	H	Hidalgo	Santiago de Anaya	Grutas de Xoxafi, 6 Km N Lagunillas	15	4	1978								-99.31	21.13
CNMA IB	Leptonycteris yerbabuenae	29524	M	Hidalgo	Santiago de Anaya	Grutas de Xoxafi, 6 Km N Lagunillas	15	4	1978								-99.31	21.13
CNMA IB	Leptonycteris yerbabuenae	8900	M	HIDALGO	Santiago de Anaya	Xoxafí, 6 Km N Lagunillas	27	4	1985		20	23	7	99	1	10	-99.0194	20.3853
CNMA IB	Leptonycteris yerbabuenae	8232	M	Hidalgo	Santiago de Anaya	Grutas de Xoxafi, 6 Km N Lagunillas	26	7	1964								-99.31	21.13
UAMI	Leptonycteris yerbabuenae	45941	M	Hidalgo	Santiago de Anaya	Grutas de Xoxafi, 6 Km N Lagunillas	6	4	1967								-99.31	21.13
CNMA IB	Leptonycteris yerbabuenae	45942	H	Hidalgo	Santiago de Anaya	Grutas de Xoxafi, 6 Km N Lagunillas	6	4	1967								-99.31	21.13
CNMA IB	Leptonycteris yerbabuenae	45943	M	Hidalgo	Santiago de Anaya	Grutas de Xoxafi, 6 Km N Lagunillas	6	4	1967								-99.31	21.13
CNMA IB	Leptonycteris yerbabuenae	45944	H	Hidalgo	Santiago de Anaya	Grutas de Xoxafi, 6 Km N Lagunillas	6	4	1967								-99.31	21.13
CNMA IB	Leptonycteris yerbabuenae	45946	H	Hidalgo	Santiago de Anaya	Grutas de Xoxafi, 6 Km N Lagunillas	6	4	1967								-99.31	21.13
CNMA IB	Leptonycteris yerbabuenae	291519	M	Hidalgo	Santiago de Anaya	Grutas de Xoxafi, 6 Km N Lagunillas	15	4	1978								-99.31	21.13
CNMA IB	Leptonycteris yerbabuenae	17797	M	Hidalgo		3.25 km N, 3 km W Tasquillo	24	3	1983	1620							-99.3411	20.5755
CNMA IB	Leptonycteris yerbabuenae	17798	H	Hidalgo		3.25 km N, 3 km W Tasquillo	24	3	1983	1620							-99.3411	20.5755
ENCB IPN	Leptonycteris yerbabuenae	17799	H	Hidalgo		3.25 km N, 3 km W Tasquillo	24	3	1983	1620							-99.3411	20.5755
ENCB IPN	Leptonycteris yerbabuenae	17800	H	Hidalgo		3.25 km N, 3 km W Tasquillo	24	3	1983	1620							-99.3411	20.5755
ENCB IPN	Leptonycteris yerbabuenae	17801	M	Hidalgo		3.25 km N, 3 km W Tasquillo	24	3	1983	1620							-99.3411	20.5755
ENCB IPN	Leptonycteris yerbabuenae	17802	H	Hidalgo		3.25 km N, 3 km W Tasquillo	24	3	1983	1620							-99.3411	20.5755
ENCB IPN	Leptonycteris yerbabuenae	21370	H	Hidalgo		3.25 km N, 3 km W Tasquillo	25	5	1985	1620							-99.3411	20.5755
ENCB IPN	Leptonycteris yerbabuenae	21371	H	Hidalgo		3.25 km N, 3 km W Tasquillo	25	5	1985	1620							-99.3411	20.5755
ENCB IPN	Leptonycteris yerbabuenae	21372	H	Hidalgo		3.25 km N, 3 km W Tasquillo	25	5	1985	1620							-99.3411	20.5755
ENCB IPN	Leptonycteris yerbabuenae	21373	H	Hidalgo		3.25 km N, 3 km W Tasquillo	25	5	1985	1620							-99.3411	20.5755
ENCB IPN	Leptonycteris yerbabuenae	21374	H	Hidalgo		3.25 km N, 3 km W Tasquillo	25	5	1985	1620							-99.3411	20.5755
ENCB IPN	Leptonycteris yerbabuenae	21375	H	Hidalgo		3.25 km N, 3 km W Tasquillo	25	5	1985	1620							-99.3411	20.5755
ENCB IPN	Leptonycteris yerbabuenae	21376	M	Hidalgo		3.25 km N, 3 km W Tasquillo	25	5	1985	1620							-99.3411	20.5755
ENCB IPN	Leptonycteris yerbabuenae	21377	H	Hidalgo		3.25 km N, 3 km W Tasquillo	25	5	1985	1620							-99.3411	20.5755
ENCB IPN	Leptonycteris yerbabuenae	21378	H	Hidalgo		3.25 km N, 3 km W Tasquillo	25	5	1985	1620							-99.3411	20.5755
ENCB IPN	Leptonycteris yerbabuenae	21379	H	Hidalgo		3.25 km N, 3 km W Tasquillo	25	5	1985	1620							-99.3411	20.5755
ENCB IPN	Leptonycteris yerbabuenae	21380	H	Hidalgo		3.25 km N, 3 km W Tasquillo	25	5	1985	1620							-99.3411	20.5755
ENCB IPN	Leptonycteris yerbabuenae	21381	M	Hidalgo		3.25 km N, 3 km W Tasquillo	25	5	1985	1620							-99.3411	20.5755
ENCB IPN	Leptonycteris yerbabuenae	21383	H	Hidalgo		3.25 km N, 3 km W Tasquillo	25	5	1985	1620							-99.3411	20.5755
ENCB IPN	Leptonycteris yerbabuenae	21384	H	Hidalgo		3.25 km N, 3 km W Tasquillo	25	5	1985	1620							-99.3411	20.5755
ENCB IPN	Leptonycteris yerbabuenae	21385	H	Hidalgo		3.25 km N, 3 km W Tasquillo	1	6	1985	1620							-99.3411	20.5755
ENCB IPN	Leptonycteris yerbabuenae	21386	M	Hidalgo		3.25 km N, 3 km W Tasquillo	1	6	1985	1620							-99.3411	20.5755
ENCB IPN	Leptonycteris yerbabuenae	21887	H	Hidalgo		3.25 km N, 3 km W Tasquillo	1	6	1985	1620							-99.3411	20.5755
ENCB IPN	Leptonycteris yerbabuenae	21388	M	Hidalgo		3.25 km N, 3 km W Tasquillo	1	6	1985	1620							-99.3411	20.5755
ENCB IPN	Leptonycteris yerbabuenae	21389	M	Hidalgo		3.25 km N, 3 km W Tasquillo	1	6	1985	1620							-99.3411	20.5755
ENCB IPN	Leptonycteris yerbabuenae	21390	H	Hidalgo		3.25 km N, 3 km W Tasquillo	2	6	1985	1620							-99.3411	20.5755
ENCB IPN	Leptonycteris yerbabuenae	21391	M	Hidalgo		3.25 km N, 3 km W Tasquillo	2	6	1985	1620							-99.3411	20.5755
ENCB IPN	Leptonycteris yerbabuenae	17803	M	Hidalgo		3.25 km N, 3 km W Tasquillo	24	3	1983	1620							-99.3411	20.5755
ENCB IPN	Leptonycteris yerbabuenae	17804	M	Hidalgo		3.25 km N, 3 km W Tasquillo	24	3	1983	1620							-99.3411	20.5755
ENCB IPN	Leptonycteris yerbabuenae	17805	M	Hidalgo		3.25 km N, 3 km W Tasquillo	24	3	1983	1620							-99.3411	20.5755
ENCB IPN	Leptonycteris yerbabuenae	17806	H	Hidalgo		6 km N, Lagunilla	22	3	1983	2000							-99.0275	20.3977
ENCB IPN	Leptonycteris yerbabuenae	17807	M	Hidalgo		6 km N, Lagunilla	22	3	1983	2000							-99.0275	20.3977
ENCB IPN	Leptonycteris yerbabuenae	17808	M	Hidalgo		6 km N, Lagunilla	22	3	1983	2000							-99.0275	20.3977
ENCB IPN	Leptonycteris yerbabuenae	17809	M	Hidalgo		7 km N, Lagunilla	22	3	1983	2000							-99.0275	20.3977
ENCB IPN	Leptonycteris yerbabuenae	17810	M	Hidalgo		8 km N, Lagunilla	22	3	1983	2000							-99.0275	20.3977
ENCB IPN	Leptonycteris yerbabuenae	17811	H	Hidalgo		9 km N, Lagunilla	22	3	1983	2000							-99.0275	20.3977
ENCB IPN	Leptonycteris yerbabuenae	17812	H	Hidalgo		3.25 km N, 3 km W Tasquillo	24	3	1983	1620							-99.0275	20.3977
ENCB IPN	Leptonycteris yerbabuenae	17813	M	Hidalgo		6 km N, Lagunilla	22	3	1983	2000							-99.0275	20.3977
ENCB IPN	Leptonycteris yerbabuenae	17814	M	Hidalgo		6 km N, Lagunilla	22	3	1983	2000							-99.0275	20.3977
ENCB IPN	Leptonycteris yerbabuenae	15185	M	Hidalgo		1 km W Mezquititlán	21	3	1983	1290							-98.6483	20.5211
ENCB IPN	Leptonycteris yerbabuenae	15928	M	Hidalgo		2.8 km W Mezquititlán	8	3		1260							-98.6653	20.521
ENCB IPN	Leptonycteris yerbabuenae	15187	M	Hidalgo		2 km S Mezquititlán	22	3	1980	1290							-98.6727	20.5123
ENCB IPN	Leptonycteris yerbabuenae	15188	M	Hidalgo		3 km S Mezquititlán	22	3	1980	1290							-98.6725	20.5037
ENCB IPN	Leptonycteris yerbabuenae	40167	H	Hidalgo		3.9 km S Mezquititlán	14	3	1998	1325							-98.6725	20.4953
ENCB IPN	Leptonycteris yerbabuenae	40168	H	Hidalgo		3.9 km S Mezquititlán	14	3	1998	1325							-98.6725	20.4953
ENCB IPN	Leptonycteris yerbabuenae	40169	Indefinido	Hidalgo		3.9 km S Mezquititlán	14	3	1998	1325							-98.6725	20.4953
ENCB IPN	Leptonycteris yerbabuenae	39656	M	Hidalgo		3.9 km S Mezquititlán	28	3	1997	1325							-98.6725	20.4953
ENCB IPN	Leptonycteris yerbabuenae	40171	M Escrotado	Hidalgo		3.9 km S Mezquititlán	20	4	1997	1325							-98.6725	20.4953
ENCB IPN	Leptonycteris yerbabuenae	40172	M Escrotado	Hidalgo		3.9 km S Mezquititlán	20	4	1997	1325							-98.6725	20.4953
ENCB IPN	Leptonycteris yerbabuenae	40173	H	Hidalgo		3.9 km S Mezquititlán	20	4	1997	1325							-98.6725	20.4953
ENCB IPN	Leptonycteris yerbabuenae	40174	H	Hidalgo		3.9 km S Mezquititlán	28	6	1997	1325							-98.6725	20.4953
ENCB IPN	Leptonycteris yerbabuenae	40170	M	Hidalgo		3.9 km S Mezquititlán	6	9	1997	1325							-98.6725	20.4953
ENCB IPN	Leptonycteris yerbabuenae	18984	M	Hidalgo		4 km S Mezquititlán	9	4	1984	1200							-98.6725	20.4941
ENCB IPN	Leptonycteris yerbabuenae	18985	M	Hidalgo		4 km S Mezquititlán	22	4	1984	1200							-98.6725	20.4941
ENCB IPN	Leptonycteris yerbabuenae	18986	M	Hidalgo		4 km S Mezquititlán	22	4	1984	1200							-98.6725	20.4941
ENCB IPN	Leptonycteris yerbabuenae	18987	M	Hidalgo		4 km S Mezquititlán	29	4	1984	1200							-98.6725	20.4941
ENCB IPN	Leptonycteris yerbabuenae	18988	M	Hidalgo		4 km S Mezquititlán	29	4	1984	1200							-98.6725	20.4941
ENCB IPN	Leptonycteris yerbabuenae	18989	M	Hidalgo		4 km S Mezquititlán	29	4	1984	1200							-98.6725	20.4941
ENCB IPN	Leptonycteris yerbabuenae	18990	M	Hidalgo		4 km S Mezquititlán	29	4	1984	1200							-98.6725	20.4941
ENCB IPN	Leptonycteris yerbabuenae	14310	M	Hidalgo		4 km S Mezquititlán	3	5	1979	1290							-98.6725	20.4941
ENCB IPN	Leptonycteris yerbabuenae	14311	H	Hidalgo		Mezquititlán	4	5	1979								-98.6726	20.5307
ENCB IPN	Leptonycteris yerbabuenae	14312	H	Hidalgo		Mezquititlán	4	5	1979								-98.6726	20.5307
ENCB IPN	Leptonycteris yerbabuenae	14313	M	Hidalgo		Mezquititlán											-98.6726	20.5307
ENCB IPN	Leptonycteris yerbabuenae	14314	H	Hidalgo		2 km S Mezquititlán	4	5	1979								-98.6727	20.5123
ENCB IPN	Leptonycteris yerbabuenae	9060	H	Hidalgo		3 km S Mezquititlán	26	5	1997								-98.6725	20.5037
ENCB IPN	Leptonycteris yerbabuenae	41724	M	Hidalgo		3.9 km S Mezquititlán	3	5	1998	1325							-98.6725	20.4953
ENCB IPN	Leptonycteris yerbabuenae	41725	H	Hidalgo		3.9 km S Mezquititlán	22	8	1998	1325							-98.6725	20.4953
ENCB IPN	Leptonycteris yerbabuenae	41726	M	Hidalgo		3.9 km S Mezquititlán	23	8	1998	1325							-98.6725	20.4953
ENCB IPN	Leptonycteris yerbabuenae	41727	H	Hidalgo		3.9 km S Mezquititlán	10	5	1998	1325							-98.6725	20.4953
ENCB IPN	Leptonycteris yerbabuenae	41728	M	Hidalgo		3.9 km S Mezquititlán	10	5	1998	1325							-98.6725	20.4953
ENCB IPN	Leptonycteris yerbabuenae	41729	H	Hidalgo		3.9 km S Mezquititlán	10	5	1998	1325							-98.6725	20.4953
ENCB IPN	Leptonycteris yerbabuenae	19302	H	Hidalgo		1.5 km S, 1.2 km E Mezquititlán	7	4	1984	1350							-98.6627	20.5167
ENCB IPN	Leptonycteris yerbabuenae	19303	M	Hidalgo		1.5 km S, 1.2 km E Mezquititlán	6	4	1984	1350							-98.6627	20.5167
ENCB IPN	Leptonycteris yerbabuenae	19304	M	Hidalgo		1.5 km S, 1.2 km E Mezquititlán	7	4	1984	1350							-98.6627	20.5167
ENCB IPN	Leptonycteris yerbabuenae	19305	M	Hidalgo		1.5 km S, 1.2 km E Mezquititlán	7	4	1984	1350							-98.6627	20.5167
ENCB IPN	Leptonycteris yerbabuenae	19306	H	Hidalgo		1.5 km S, 1.2 km E Mezquititlán	7	4	1984	1350							-98.6627	20.5167
ENCB IPN	Leptonycteris yerbabuenae	15184	M	Hidalgo		1 km W Metztitlán	21	3	1980	1290							-98.6483	20.5211
ENCB IPN	Leptonycteris yerbabuenae	19301	M	Hidalgo		1.5 km S, 1.2 km E Mezquititlán	6	4	1984	1350							-98.6627	20.5167
ENCB IPN	Leptonycteris yerbabuenae	19300	H no embrión	Hidalgo		1.5 km S, 1.2 km E Mezquititlán	7	4	1984	1350							-98.6627	20.5167
ENCB IPN	Leptonycteris yerbabuenae	19299	M	Hidalgo		1.5 km S, 1.2 km E Mezquititlán	7	4	1984	1350							-98.6627	20.5167
ENCB IPN	Leptonycteris yerbabuenae	19298	M	Hidalgo		1.5 km S, 1.2 km E Mezquititlán	7	4	1984	1350							-98.6627	20.5167
ENCB IPN	Leptonycteris yerbabuenae	19297	M	Hidalgo		1.5 km S, 1.2 km E Mezquititlán	7	4	1984	1350							-98.6627	20.5167
ENCB IPN	Leptonycteris yerbabuenae	19296	H	Hidalgo		1.5 km S, 1.2 km E Mezquititlán	7	4	1984	1420							-98.6627	20.5167
ENCB IPN	Leptonycteris yerbabuenae	19295	H no embrión	Hidalgo		1.5 km S, 1.2 km E Mezquititlán	7	4	1984	1350							-98.6627	20.5167
ENCB IPN	Leptonycteris yerbabuenae	19294	M	Hidalgo		1.5 km S, 1.2 km E Mezquititlán	7	4	1984	1350							-98.6627	20.5167
ENCB IPN	Leptonycteris yerbabuenae	19293	M	Hidalgo		1.5 km S, 1.2 km E Mezquititlán	7	4	1984	1350							-98.6627	20.5167
ENCB IPN	Leptonycteris yerbabuenae	19292	M	Hidalgo		1.5 km S, 1.2 km E Mezquititlán	7	4	1984	1350							-98.6627	20.5167
ENCB IPN	Leptonycteris yerbabuenae	19291	M	Hidalgo		1.5 km S, 1.2 km E Mezquititlán	7	4	1984	1350							-98.6627	20.5167
ENCB IPN	Leptonycteris yerbabuenae	19290	M	Hidalgo		1.5 km S, 1.2 km E Mezquititlán	7	4	1984	1350							-98.6627	20.5167
ENCB IPN	Leptonycteris yerbabuenae	19289	M	Hidalgo		1.5 km S, 1.2 km E Mezquititlán	7	4	1984	1350							-98.6627	20.5167
ENCB IPN	Leptonycteris yerbabuenae	19288	M	Hidalgo		1.5 km S, 1.2 km E Mezquititlán		4	1984	1420							-98.6627	20.5167
ENCB IPN	Leptonycteris yerbabuenae	19287	M	Hidalgo		1.5 km S, 1.2 km E Mezquititlán	7	4	1984	1350							-98.6627	20.5167
ENCB IPN	Leptonycteris yerbabuenae	19286	M	Hidalgo		1.5 km S, 1.2 km E Mezquititlán	7	4	1984	1350							-98.6627	20.5167
ENCB IPN	Leptonycteris yerbabuenae	19285	M	Hidalgo		1.5 km S, 1.2 km E Mezquititlán	6	4	1984	1350							-98.6627	20.5167
ENCB IPN	Leptonycteris yerbabuenae	16959	M	Hidalgo		2.2 km N Mezquititlan	22	3	1982								-98.6725	20.5507
ENCB IPN	Leptonycteris yerbabuenae	17564	M	Hidalgo	Nicolás Flores	0.4 km N, 0.6 km W Nicolás Flores	26	9	1982	1700							-99.1561	20.7715
ENCB IPN	Leptonycteris yerbabuenae	17563	M	Hidalgo	Pisaflores	2 km S, 3.2 E, Pisaflores	22	9	1982	250							-98.9751	21.1762
ENCB IPN	Leptonycteris yerbabuenae	41347	M	Hidalgo		Xoxafi, 6 km N, Lagunillas	2	8	1989	1870							-99.0176	20.3967
ENCB IPN	Leptonycteris yerbabuenae	41346	M	Hidalgo		Xoxafi, 6 km N, Lagunillas	2	8	1989	1870							-99.0176	20.3967
ENCB IPN	Leptonycteris yerbabuenae	41345	H	Hidalgo		Xoxafi, 6 km N, Lagunillas	2	8	1989	1870							-99.0176	20.3967
ENCB IPN	Leptonycteris yerbabuenae	41344	H	Hidalgo		Xoxafi, 6 km N, Lagunillas	2	8	1989	1870							-99.0176	20.3967
ENCB IPN	Leptonycteris yerbabuenae	41343	M	Hidalgo		Xoxafi, 6 km N, Lagunillas	2	8	1989	1870							-99.0176	20.3967
ENCB IPN	Leptonycteris yerbabuenae	41350	M	Hidalgo		6 km N, Lagunilla	2	8	1999	1870							-99.0176	20.3972
ENCB IPN	Leptonycteris yerbabuenae	41349	M	Hidalgo		Xoxafi, 6 km N, Lagunillas	2	8	1999	1870							-99.0176	20.3967
ENCB IPN	Leptonycteris yerbabuenae	41348	H	Hidalgo		Xoxafi, 6 km N, Lagunillas	2	8	1999	1870							-99.0176	20.3967
ENCB IPN	Leptonycteris yerbabuenae	41352	M	Hidalgo		6 km N, Lagunilla	2	8	1999	1870							-99.0176	20.3972
ENCB IPN	Leptonycteris yerbabuenae	41351	H	Hidalgo		6 km N, Lagunilla	2	8	1999	1870							-99.0176	20.3972
ENCB IPN	Leptonycteris yerbabuenae	43472	H	Hidalgo		6 km N, Lagunilla	13	8	2003	2000							-99.0176	20.3972
ENCB IPN	Leptonycteris yerbabuenae	43594	H	Hidalgo		6 km N, Lagunilla	17	8	2003	2000							-99.0176	20.3972
ENCB IPN	Leptonycteris yerbabuenae	43598	H	Hidalgo		6 km N, Lagunilla	21	8	2003	2000							-99.0176	20.3972
ENCB IPN	Leptonycteris yerbabuenae	40423	M	Hidalgo		Grutas Xoxafi, 6 km N Lagunillas	30	8	1998	2000							-99.0176	20.3967
ENCB IPN	Leptonycteris yerbabuenae	43597	M	Hidalgo		6 km N, Lagunilla				2000							-99.0176	20.3972
ENCB IPN	Leptonycteris yerbabuenae	39574	M	Hidalgo		6 km N, Lagunilla	1	7	1995	2000							-99.0176	20.3972
ENCB IPN	Leptonycteris yerbabuenae	39575	M	Hidalgo		6 km N, Lagunilla	1	7	1995	2000							-99.0176	20.3972
ENCB IPN	Leptonycteris yerbabuenae	39576	H	Hidalgo		6 km N, Lagunilla	1	7	1995	2000							-99.0176	20.3972
ENCB IPN	Leptonycteris yerbabuenae	39577	H	Hidalgo		6 km N, Lagunilla	15	7	1995	2000							-99.0176	20.3972
ENCB IPN	Leptonycteris yerbabuenae	39578	M	Hidalgo		6 km N, Lagunilla	1	7	1995	2000							-99.0176	20.3972
ENCB IPN	Leptonycteris yerbabuenae	39579	M	Hidalgo		6 km N, Lagunilla	1	7	1995	2000							-99.0176	20.3972
ENCB IPN	Leptonycteris yerbabuenae	38580	H	Hidalgo		6 km N, Lagunilla	22	7	1995	2000							-99.0176	20.3972
ENCB IPN	Leptonycteris yerbabuenae	43593	H	Hidalgo		Xoxafi, 6 km N, Lagunillas	15	7	2006	1870							-99.0176	20.3972
ENCB IPN	Leptonycteris yerbabuenae	39581	M	Hidalgo		6 km N, Lagunilla	22	7	1995	2000							-99.0176	20.3972
ENCB IPN	Leptonycteris yerbabuenae	39585	M	Hidalgo		Grutas Xoxafi, 6 km N Lagunillas	22	7	1995	2000							-99.0176	20.3972
ENCB IPN	Leptonycteris yerbabuenae	39586	H	Hidalgo		Grutas Xoxafi, 6 km N Lagunillas	22	7	1995	2000							-99.0176	20.3972
ENCB IPN	Leptonycteris yerbabuenae	38576	H	Hidalgo		Grutas Xoxafi, 6 km N Lagunillas	22	7	1995	2000							-99.0176	20.3972
ENCB IPN	Leptonycteris yerbabuenae	38575	M	Hidalgo		Grutas Xoxafi, 6 km N Lagunillas	22	7	1995	2000							-99.0176	20.3972
ENCB IPN	Leptonycteris yerbabuenae	38574	M	Hidalgo		Grutas Xoxafi, 6 km N Lagunillas	22	7	1995	2000							-99.0176	20.3972
ENCB IPN	Leptonycteris yerbabuenae	38577	H	Hidalgo		Grutas Xoxafi, 6 km N Lagunillas	22	7	1995	2000							-99.0176	20.3972
ENCB IPN	Leptonycteris yerbabuenae	38578	M	Hidalgo		Grutas Xoxafi, 6 km N Lagunillas	22	7	1995	2000							-99.0176	20.3972
ENCB IPN	Leptonycteris yerbabuenae	38579	H	Hidalgo		Grutas Xoxafi, 6 km N Lagunillas	22	7	1995	2000							-99.0176	20.3972
ENCB IPN	Leptonycteris yerbabuenae	38580	H	Hidalgo		Grutas Xoxafi, 6 km N Lagunillas	22	7	1995	2000							-99.0176	20.3972
ENCB IPN	Leptonycteris yerbabuenae	38581	M	Hidalgo		Grutas Xoxafi, 6 km N Lagunillas	22	7	1995	2000							-99.0176	20.3972
ENCB IPN	Leptonycteris yerbabuenae	38582	H	Hidalgo		Grutas Xoxafi, 6 km N Lagunillas	22	7	1995	2000							-99.0176	20.3972
ENCB IPN	Leptonycteris yerbabuenae	38583	H	Hidalgo		Grutas Xoxafi, 6 km N Lagunillas	22	7	1995	2000							-99.0176	20.3972
ENCB IPN	Leptonycteris yerbabuenae	43595	Indefinido	Hidalgo		Grutas Xoxafi, 6 km N Lagunillas	22	7	1995	2000							-99.0176	20.3972
ENCB IPN	Leptonycteris yerbabuenae	43345	H	Hidalgo		Grutas Xoxafi, 6 km N Lagunillas	1	8	2004	2000							-99.0176	20.3972
ENCB IPN	Leptonycteris yerbabuenae	43346	H	Hidalgo		Grutas Xoxafi, 6 km N Lagunillas	1	8	2004	2000							-99.0176	20.3972
ENCB IPN	Leptonycteris yerbabuenae	43347	H	Hidalgo		Grutas Xoxafi, 6 km N Lagunillas	1	8	2004	2000							-99.0176	20.3972
ENCB IPN	Leptonycteris yerbabuenae	43348	M	Hidalgo		Grutas Xoxafi, 6 km N Lagunillas	1	8	2004	2000							-99.0176	20.3972
ENCB IPN	Leptonycteris yerbabuenae	43349	M	Hidalgo		Grutas Xoxafi, 6 km N Lagunillas	1	8	2004	2000							-99.0176	20.3972
ENCB IPN	Leptonycteris yerbabuenae	43350	M	Hidalgo		Grutas Xoxafi, 6 km N Lagunillas	1	8	2004	2000							-99.0176	20.3972
ENCB IPN	Leptonycteris yerbabuenae	43351	M	Hidalgo		Grutas Xoxafi, 6 km N Lagunillas	1	8	2004	2000							-99.0176	20.3972
ENCB IPN	Leptonycteris yerbabuenae	2784	H	Hidalgo		Grutas Xoxafi, 6 km N Lagunillas	8	4	1967	2000							-99.0176	20.3972
ENCB IPN	Leptonycteris yerbabuenae	2785	H	Hidalgo		Grutas Xoxafi, 6 km N Lagunillas	8	4	1967	2000							-99.0176	20.3972
ENCB IPN	Leptonycteris yerbabuenae	43474	M	Hidalgo		Grutas Xoxafi, 6 km N Lagunillas	1	6	2004	1870							-99.0176	20.3972
ENCB IPN	Leptonycteris yerbabuenae	43596	M	Hidalgo		Grutas Xoxafi, 6 km N Lagunillas	1	6	2004	1870							-99.0176	20.3972
ENCB IPN	Leptonycteris yerbabuenae	43321	H	Hidalgo		Xoxafi, 6 km N, Lagunillas	1	6	2004	2000							-99.0176	20.3972
ENCB IPN	Leptonycteris yerbabuenae	43322	H	Hidalgo		Xoxafi, 6 km N, Lagunillas	1	6	2004	2000							-99.0176	20.3972
ENCB IPN	Leptonycteris yerbabuenae	43323	M	Hidalgo		Xoxafi, 6 km N, Lagunillas	1	6	2004	2000							-99.0176	20.3972
ENCB IPN	Leptonycteris yerbabuenae	43324	M	Hidalgo		Xoxafi, 6 km N, Lagunillas	1	6	2004	2000							-99.0176	20.3972
ENCB IPN	Leptonycteris yerbabuenae	43325	H	Hidalgo		Xoxafi, 6 km N, Lagunillas	1	6	2004	2000							-99.0176	20.3972
ENCB IPN	Leptonycteris yerbabuenae	43326	M	Hidalgo		Xoxafi, 6 km N, Lagunillas	1	6	2004	2000							-99.0176	20.3972
ENCB IPN	Leptonycteris yerbabuenae	43327	M	Hidalgo		Xoxafi, 6 km N, Lagunillas	1	6	2004	2000							-99.0176	20.3972
ENCB IPN	Leptonycteris yerbabuenae	43328	H	Hidalgo		Xoxafi, 6 km N, Lagunillas	1	6	2004	2000							-99.0176	20.3972
ENCB IPN	Leptonycteris yerbabuenae	42233	M	Hidalgo		6 km N, Lagunilla	19	6	2001	1870							-99.0176	20.3972
ENCB IPN	Leptonycteris yerbabuenae	43329	H	Hidalgo		Xoxafi, 6 km N, Lagunillas	23	6	2004	2000							-99.0176	20.3972
ENCB IPN	Leptonycteris yerbabuenae	43330	H	Hidalgo		Xoxafi, 6 km N, Lagunillas	23	6	2004	2000							-99.0176	20.3972
ENCB IPN	Leptonycteris yerbabuenae	43331	H	Hidalgo		Xoxafi, 6 km N, Lagunillas	23	6	2004	2000							-99.0176	20.3972
ENCB IPN	Leptonycteris yerbabuenae	43332	M	Hidalgo		Xoxafi, 6 km N, Lagunillas	23	6	2004	2000							-99.0176	20.3972
ENCB IPN	Leptonycteris yerbabuenae	43333	H	Hidalgo		Xoxafi, 6 km N, Lagunillas	23	6	2004	2000							-99.0176	20.3972
ENCB IPN	Leptonycteris yerbabuenae	43334	M	Hidalgo		Xoxafi, 6 km N, Lagunillas	23	6	2004	2000							-99.0176	20.3972
ENCB IPN	Leptonycteris yerbabuenae	43335	M	Hidalgo		Xoxafi, 6 km N, Lagunillas	23	6	2004	2000							-99.0176	20.3972
ENCB IPN	Leptonycteris yerbabuenae	43336	M	Hidalgo		Xoxafi, 6 km N, Lagunillas	23	6	2004	2000							-99.0176	20.3972
ENCB IPN	Leptonycteris yerbabuenae	43467	H	Hidalgo		Grutas Xoxafi, 6 km N Lagunillas	1	6	2003	1870							-99.0176	20.3972
ENCB IPN	Leptonycteris yerbabuenae	43468	M	Hidalgo		Grutas Xoxafi, 6 km N Lagunillas	1	6	2003	1870							-99.0176	20.3972
ENCB IPN	Leptonycteris yerbabuenae	43469	M	Hidalgo		Grutas Xoxafi, 6 km N Lagunillas	1	6	2003	1870							-99.0176	20.3972
ENCB IPN	Leptonycteris yerbabuenae	43470	M	Hidalgo		Grutas Xoxafi, 6 km N Lagunillas	1	6	2003	1870							-99.0176	20.3972
ENCB IPN	Leptonycteris yerbabuenae	43471	H	Hidalgo		Grutas Xoxafi, 6 km N Lagunillas	1	6	2003	1870							-99.0176	20.3972
ENCB IPN	Leptonycteris yerbabuenae	43473	H	Hidalgo		Grutas Xoxafi, 6 km N Lagunillas	24	6	2004	1870							-99.0176	20.3972
ENCB IPN	Leptonycteris yerbabuenae	6676	M	Hidalgo		6 km N, Lagunilla	29	6	1972	2000							-99.0176	20.3972
ENCB IPN	Leptonycteris yerbabuenae	43337	H	Hidalgo		Grutas Xoxafi, 6 km N Lagunillas	24	6	2004	2000							-99.0176	20.3972
ENCB IPN	Leptonycteris yerbabuenae	43338	H	Hidalgo		Xoxafi, 6 km N, Lagunillas	24	6	2004	2000							-99.0176	20.3972
ENCB IPN	Leptonycteris yerbabuenae	43339	H	Hidalgo		Xoxafi, 6 km N, Lagunillas	24	6	2004	2000							-99.0176	20.3972
ENCB IPN	Leptonycteris yerbabuenae	43340	H	Hidalgo		Xoxafi, 6 km N, Lagunillas	24	6	2004	2000							-99.0176	20.3972
ENCB IPN	Leptonycteris yerbabuenae	43341	M	Hidalgo		Xoxafi, 6 km N, Lagunillas	24	6	2004	2000							-99.0176	20.3972
ENCB IPN	Leptonycteris yerbabuenae	43342	M	Hidalgo		Xoxafi, 6 km N, Lagunillas	24	6	2004	2000							-99.0176	20.3972
ENCB IPN	Leptonycteris yerbabuenae	43343	M	Hidalgo		Xoxafi, 6 km N, Lagunillas	24	6	2004	2000							-99.0176	20.3972
ENCB IPN	Leptonycteris yerbabuenae	43344	M	Hidalgo		Xoxafi, 6 km N, Lagunillas	24	6	2004	2000							-99.0176	20.3972
ENCB IPN	Leptonycteris yerbabuenae	41352	M	Hidalgo		6 km N Lagunillas	2	8	1999	1870							-99.0176	20.3972
ENCB IPN	Leptonycteris yerbabuenae	41351	H	Hidalgo		6 km N Lagunillas	2	8	1999	1870							-99.0176	20.3972
ENCB IPN	Leptonycteris yerbabuenae	41350	M	Hidalgo		6 km N Lagunillas	2	8	1999	1870							-99.0176	20.3972
ENCB IPN	Leptonycteris yerbabuenae	41349	M	Hidalgo		Xoxafi, 6 km N, Lagunillas	2	8	1999	1870							-99.0176	20.3972
ENCB IPN	Leptonycteris yerbabuenae	41348	H	Hidalgo		Xoxafi, 6 km N, Lagunillas	2	8	1999	1870							-99.0176	20.3972
ENCB IPN	Leptonycteris yerbabuenae	41347	M	Hidalgo		Xoxafi, 6 km N, Lagunillas	2	8	1999	1870							-99.0176	20.3972
ENCB IPN	Leptonycteris yerbabuenae	41346	M	Hidalgo		Xoxafi, 6 km N, Lagunillas	2	8	1999	1870							-99.0176	20.3972
ENCB IPN	Leptonycteris yerbabuenae	41345	H	Hidalgo		Xoxafi, 6 km N, Lagunillas	2	8	1999	1870							-99.0176	20.3972
ENCB IPN	Leptonycteris yerbabuenae	41344	H	Hidalgo		Xoxafi, 6 km N, Lagunillas	2	8	1999	1870							-99.0176	20.3972
ENCB IPN	Leptonycteris yerbabuenae	41343	M	Hidalgo		Xoxafi, 6 km N, Lagunillas	2	8	1999	1870							-99.0176	20.3972
ENCB IPN	Leptonycteris yerbabuenae	43597	M	Hidalgo		6 km N, Lagunilla				2000							-99.0176	20.3972
ENCB IPN	Leptonycteris yerbabuenae	40423	M	Hidalgo		Grutas Xoxafi, 6 km N Lagunillas	30	8	1998	2000							-99.0176	20.3972
ENCB IPN	Leptonycteris yerbabuenae	43598	H	Hidalgo		6 km N, Lagunilla	21	8	2003	2000							-99.0176	20.3972
ENCB IPN	Leptonycteris yerbabuenae	43594	H	Hidalgo		6 km N, Lagunilla	21	8	2003	2000							-99.0176	20.3972
ENCB IPN	Leptonycteris yerbabuenae	43472	H	Hidalgo		6 km N, Lagunilla	13	8	2003	2000							-99.0176	20.3972
ENCB IPN	Leptonycteris yerbabuenae	14089	M	Jalisco	La Huerta	3Km NW Chamela, Isla San Andrés	26	1	1972								-105.09	19.5
ENCB IPN	Leptonycteris yerbabuenae	14090	M	Jalisco	La Huerta	3Km NW Chamela, Isla San Andrés	26	1	1972								-105.09	19.5
CNMA IB	Leptonycteris yerbabuenae	14091	M	Jalisco	La Huerta	3Km NW Chamela, Isla San Andrés	26	1	1972								-105.09	19.5
CNMA IB	Leptonycteris yerbabuenae	14092	M	Jalisco	La Huerta	3Km NW Chamela, Isla San Andrés	26	1	1972								-105.09	19.5
CNMA IB	Leptonycteris yerbabuenae	14093	M	Jalisco	La Huerta	3Km NW Chamela, Isla San Andrés	26	1	1972								-105.09	19.5
CNMA IB	Leptonycteris yerbabuenae	14094	M	Jalisco	La Huerta	3Km NW Chamela, Isla San Andrés	26	1	1972								-105.09	19.5
CNMA IB	Leptonycteris yerbabuenae	14095	M	Jalisco	La Huerta	3Km NW Chamela, Isla San Andrés	26	1	1972								-105.09	19.5
CNMA IB	Leptonycteris yerbabuenae	14101	M	Jalisco	La Huerta	3Km NW Chamela, Isla San Andrés	26	1	1972								-105.09	19.5
CNMA IB	Leptonycteris yerbabuenae	14102	M	Jalisco	La Huerta	3Km NW Chamela, Isla San Andrés	26	1	1972								-105.09	19.5
CNMA IB	Leptonycteris yerbabuenae	14103	M	Jalisco	La Huerta	3Km NW Chamela, Isla San Andrés	26	1	1972								-105.09	19.5
CNMA IB	Leptonycteris yerbabuenae	14104	M	Jalisco	La Huerta	3Km NW Chamela, Isla San Andrés	26	1	1972								-105.09	19.5
CNMA IB	Leptonycteris yerbabuenae	14105	H	Jalisco	La Huerta	Isla Don Panchito	26	1	1972								-105.09	19.5
CNMA IB	Leptonycteris yerbabuenae	14106	M	Jalisco	La Huerta	Isla San Andrés	25	3	1972								-105.09	19.5
CNMA IB	Leptonycteris yerbabuenae	47283	M	Jalisco	La Huerta	Isla San Andrés	12	11	2012								-105.089	19.535
CNMA IB	Leptonycteris yerbabuenae	47284	M	Jalisco	La Huerta	Isla Don Panchito	13	11	2012								-105.089	19.535
CNMA IB	Leptonycteris yerbabuenae	47285	M	Jalisco	La Huerta	Isla San Andrés	13	11	2012								-105.089	19.535
CNMA IB	Leptonycteris yerbabuenae	47286	M	Jalisco	La Huerta	Isla San Andrés	13	11	2012								-105.089	19.535
CNMA IB	Leptonycteris yerbabuenae	47287	M	Jalisco	La Huerta	Isla San Andrés	13	11	2012								-105.089	19.535
CNMA IB	Leptonycteris yerbabuenae	47288	M	Jalisco	La Huerta	Isla Don Panchito	13	11	1972								-105.089	19.535
CNMA IB	Leptonycteris yerbabuenae	47289	M	Jalisco	La Huerta	Isla Don Panchito	13	11	1972								-105.089	19.535
CNMA IB	Leptonycteris yerbabuenae	47290	M	Jalisco	La Huerta	Isla Don Panchito	13	11	1972								-105.089	19.535
CNMA IB	Leptonycteris yerbabuenae	47291	M	Jalisco	La Huerta	Isla Don Panchito	13	11	1972								-105.089	19.535
CNMA IB	Leptonycteris yerbabuenae	47292	M	Jalisco	La Huerta	Isla Don Panchito	13	11	1972								-105.089	19.535
CNMA IB	Leptonycteris yerbabuenae	47293	M	Jalisco	La Huerta	Isla Don Panchito	13	11	2012								-105.089	19.535
CNMA IB	Leptonycteris yerbabuenae	11678	M	JALISCO	La Huerta	Punta Perula	22	1	1990	10	19	31	8	105	4	57	-105.08	19.5189
CNMA IB	Leptonycteris yerbabuenae	11679	M	JALISCO	La Huerta	Punta Perula	22	1	1990	10	19	31	8	105	4	57	-105.08	19.5189
UAMI	Leptonycteris yerbabuenae	11680	M	JALISCO	La Huerta	Punta Perula	22	1	1990	10	19	31	8	105	4	57	-105.08	19.5189
UAMI	Leptonycteris yerbabuenae	11681	M	JALISCO	La Huerta	Punta Perula	22	1	1990	10	19	31	8	105	4	57	-105.08	19.5189
UAMI	Leptonycteris yerbabuenae	11682	H	JALISCO	La Huerta	Punta Perula	22	1	1990	10	19	31	8	105	4	57	-105.08	19.5189
UAMI	Leptonycteris yerbabuenae	832	M	JALISCO	La Huerta	3 Km NW Chamela	26	1	1972		19	31	45	105	4	15	-105.071	19.5292
UAMI	Leptonycteris yerbabuenae	833	H	JALISCO	La Huerta	3 Km NW Chamela	26	1	1972		19	31	45	105	4	15	-105.071	19.5292
UAMI	Leptonycteris yerbabuenae	834	M	JALISCO	La Huerta	3 Km NW Chamela	26	1	1972		19	31	45	105	4	15	-105.071	19.5292
UAMI	Leptonycteris yerbabuenae	835	H	JALISCO	La Huerta	3 Km NW Chamela	26	1	1972		19	31	45	105	4	15	-105.071	19.5292
UAMI	Leptonycteris yerbabuenae	836	H	JALISCO	La Huerta	3 Km NW Chamela	26	1	1972		19	31	45	105	4	15	-105.071	19.5292
UAMI	Leptonycteris yerbabuenae	837	H	JALISCO	La Huerta	3 Km NW Chamela	26	1	1972		19	31	45	105	4	15	-105.071	19.5292
UAMI	Leptonycteris yerbabuenae	838	M	JALISCO	La Huerta	3 Km NW Chamela	26	1	1972		19	31	45	105	4	15	-105.071	19.5292
UAMI	Leptonycteris yerbabuenae	839	H	JALISCO	La Huerta	3 Km NW Chamela	26	1	1972		19	31	45	105	4	15	-105.071	19.5292
UAMI	Leptonycteris yerbabuenae	840	M	JALISCO	La Huerta	3 Km NW Chamela	26	1	1972		19	31	45	105	4	15	-105.071	19.5292
UAMI	Leptonycteris yerbabuenae	14049	M	Jalisco	Chamela	Tostero, Playa "El Negrito" Chamela, 6Km E Chamela	25	9	1973								-105.02	19.52
UAMI	Leptonycteris yerbabuenae	14050	M	Jalisco	Chamela	6Km E Chamela	18	12	1973								-105.02	19.52
CNMA IB	Leptonycteris yerbabuenae	14051	M	Jalisco	Chamela	6Km E Chamela	18	12	1973								-105.02	19.52
CNMA IB	Leptonycteris yerbabuenae	14052	M	Jalisco	Chamela	6Km E Chamela	18	12	1973								-105.02	19.52
CNMA IB	Leptonycteris yerbabuenae	14053	M	Jalisco	Chamela	6Km E Chamela	18	12	1973								-105.02	19.52
CNMA IB	Leptonycteris yerbabuenae	14054	M	Jalisco	Chamela	6Km E Chamela	18	12	1973								-105.02	19.52
CNMA IB	Leptonycteris yerbabuenae	14097	H	Jalisco	Francisco Villa		3	2	1973	20							-104.96	19.3
CNMA IB	Leptonycteris yerbabuenae	14098	M	Jalisco	Francisco Villa		3	2	1973	20							-104.96	19.3
CNMA IB	Leptonycteris yerbabuenae	14099	M	Jalisco	Temacatita		13	2	1973								-104.87	19.28
CNMA IB	Leptonycteris yerbabuenae	41330	H	Jalisco	Manzanillo	4Km SW La Central	11	1	2000	40 msnm	19	8.9	0	103	52.9	0	-103.882	19.1483
CNMA IB	Leptonycteris yerbabuenae	6013	M	Jalisco	Piguamo		4	2	1962								-103.37	19.25
CNMA IB	Leptonycteris yerbabuenae	6037	M	Jalisco	Piguamo		4	2	1962								-103.37	19.25
CNMA IB	Leptonycteris yerbabuenae	5879	H	Jalisco	Tamay	Cueva "D.C.B", 7.5 Km O Jamay, Jalisco	9	12	1961								-102.76	20.3
CNMA IB	Leptonycteris yerbabuenae	6638	M	Jalisco	Tamay	Cueva "D.C.B", 7.5 Km O Jamay, Jalisco	9	12	1961								-102.76	20.3
CNMA IB	Leptonycteris yerbabuenae	4781	M	Jalisco	Tamay	Cueva "D.C.B", 7.5 Km O Jamay, Jalisco	9	12	1961								-102.76	20.3
CNMA IB	Leptonycteris yerbabuenae	6011	M	Jalisco	El Zapote		2	1	1962								-103.447	20.4822
CNMA IB	Leptonycteris yerbabuenae	14046	M	Jalisco	Chamela	Tostero, Playa "El Negrito" Chamela, 6Km E Chamela	6	8	1972								-105.017	19.5259
CNMA IB	Leptonycteris yerbabuenae	14100	H	Jalisco	La Huerta	3Km NW Chamela, Isla San Andrés	26	1	1972								-104.643	19.4836
CNMA IB	Leptonycteris yerbabuenae	16850	M	Jalisco	Chamela	Tostero, Playa "El Negrito" Chamela, 6Km E Chamela	3	11	1978								-105.017	19.5259
CNMA IB	Leptonycteris yerbabuenae	30066	M	Jalisco	Chamela	7Km S Chamela, "Rancho el Paraíso"	16	7	1985	5							-103.761	19.9476
CNMA IB	Leptonycteris yerbabuenae	12785	M	Jalisco	La Huerta	Bahía de Chamela, estero 1 km del río	27	11	2011								-105.082	19.5301
CNMA IB	Leptonycteris yerbabuenae	12784	M	Jalisco	La Huerta	Bahía de Chamela, estero 1 km del río											-105.082	19.5301
Museo de Zoología FC	Leptonycteris yerbabuenae	14198	M	Jalisco	Tala	km 14 Cueva Chapuzón	22	6	2000								-103.705	20.6586
Museo de Zoología FC	Leptonycteris yerbabuenae	10683	H	Jalisco	La Huerta		18	11	2008								-104.643	19.4833
Museo de Zoología FC	Leptonycteris yerbabuenae	9838	M	Jalisco	Chamela	Playa Chamela	24	11	2004								-105.082	19.5301
Museo de Zoología FC	Leptonycteris yerbabuenae	14851	M	Jalisco	La Huerta	Isla San Panchito, Chamela	3	11	2003								-104.643	19.4835
Museo de Zoología FC	Leptonycteris yerbabuenae	14859	Indefinido	Jalisco	La Huerta	Isla San Panchito, Chamela											-104.643	19.4835
Museo de Zoología FC	Leptonycteris yerbabuenae	14853	M	Jalisco	La Huerta	Isla San Panchito, Chamela	24	7	2003								-104.643	19.4835
Museo de Zoología FC	Leptonycteris yerbabuenae	14852	M	Jalisco	La Huerta	Isla San Panchito, Chamela											-104.643	19.4835
Museo de Zoología FC	Leptonycteris yerbabuenae	14854	M	Jalisco	La Huerta	Isla San Panchito, Chamela	20	4	2013								-104.643	19.4835
Museo de Zoología FC	Leptonycteris yerbabuenae	14855	M	Jalisco	La Huerta	Isla San Panchito, Chamela	20	4	2015								-104.643	19.4835
Museo de Zoología FC	Leptonycteris yerbabuenae	2234	M	Jalisco		500 m N, 3 km W Jamay	2	7	1966	1650							-102.739	20.2947
Museo de Zoología FC	Leptonycteris yerbabuenae	2235	M	Jalisco		500 m N, 3 km W Jamay	2	7	1966	1650							-102.739	20.2947
ENCB IPN	Leptonycteris yerbabuenae	2236	M	Jalisco		500 m N, 3 km W Jamay	2	7	1966	1650							-102.739	20.2947
ENCB IPN	Leptonycteris yerbabuenae	2237	M	Jalisco		500 m N, 3 km W Jamay	2	7	1966	1650							-102.739	20.2947
ENCB IPN	Leptonycteris yerbabuenae	2238	M	Jalisco		500 m N, 3 km W Jamay	2	7	1966	1650							-102.739	20.2947
ENCB IPN	Leptonycteris yerbabuenae	2239	H	Jalisco		500 m N, 3 km W Jamay	2	7	1966	1650							-102.739	20.2947
ENCB IPN	Leptonycteris yerbabuenae	2240	M	Jalisco		500 m N, 3 km W Jamay	2	7	1966	1650							-102.739	20.2947
ENCB IPN	Leptonycteris yerbabuenae	2241	M	Jalisco		500 m N, 3 km W Jamay	2	7	1966	1650							-102.739	20.2947
ENCB IPN	Leptonycteris yerbabuenae	2242	M	Jalisco		500 m N, 3 km W Jamay	2	7	1966	1650							-102.739	20.2947
ENCB IPN	Leptonycteris yerbabuenae	2243	M	Jalisco		500 m N, 3 km W Jamay	2	7	1966	1650							-102.739	20.2947
ENCB IPN	Leptonycteris yerbabuenae	2244	M	Jalisco		500 m N, 3 km W Jamay	2	7	1966	1650							-102.739	20.2947
ENCB IPN	Leptonycteris yerbabuenae	2245	M	Jalisco		500 m N, 3 km W Jamay	2	7	1966	1650							-102.739	20.2947
ENCB IPN	Leptonycteris yerbabuenae	34926	M	Jalisco		2 km SW Zacoalco	18	9	1990	1640							-103.597	20.2205
ENCB IPN	Leptonycteris yerbabuenae	34927	M	Jalisco		2 km SW Zacoalco	18	9	1990	1640							-103.597	20.2205
ENCB IPN	Leptonycteris yerbabuenae	34928	M	Jalisco		1 km SE Platanar,	14	9	1990	1030							-103.454	19.4751
ENCB IPN	Leptonycteris yerbabuenae	34929	M	Jalisco		1 km SE Platanar,	14	9	1990	1030							-103.454	19.4751
ENCB IPN	Leptonycteris yerbabuenae	34930	M	Jalisco		1 km SE Platanar,	14	9	1990	1030							-103.454	19.4751
ENCB IPN	Leptonycteris yerbabuenae	4415	M	Jalisco		8 km W. La Barca	14	9	1990								-102.623	20.2895
ENCB IPN	Leptonycteris yerbabuenae	4416	H	Jalisco		8 km W. La Barca	14	9	1990								-102.623	20.2895
ENCB IPN	Leptonycteris yerbabuenae	4417	H	Jalisco		8 km W. La Barca	14	9	1990								-102.623	20.2895
ENCB IPN	Leptonycteris yerbabuenae	4418	M	Jalisco		8 km W. La Barca	14	9	1990								-102.623	20.2895
ENCB IPN	Leptonycteris yerbabuenae	4419	M	Jalisco		8 km W. La Barca	14	9	1990								-102.623	20.2895
ENCB IPN	Leptonycteris yerbabuenae	29138	M	Jalisco		3 km N Zapotitlán de Vadillo	11	4	1988	1170							-103.812	19.5751
ENCB IPN	Leptonycteris yerbabuenae	4420	M	Jalisco		3 km N Zapotitlán de Vadillo	11	4	1988	1170							-103.812	19.5751
ENCB IPN	Leptonycteris yerbabuenae	38238	M	Jalisco		Playas El Faro, 8 km N, 5.8 km W, Emiliano Zapata	19	6	1994								-105.02	19.4622
ENCB IPN	Leptonycteris yerbabuenae	38237	M	Jalisco		Playa Santa Rosa 7 km N, 6.9 km W, Emiliano Zapata	18	6	1994								-105.031	19.4533
ENCB IPN	Leptonycteris yerbabuenae	6713	M	Jalisco		3 km S. El Grullo	8	4	1973								-104.219	19.7784
ENCB IPN	Leptonycteris yerbabuenae	6714	M	Jalisco		3 km S, El Grullo	8	4	1973								-104.219	19.7784
ENCB IPN	Leptonycteris yerbabuenae	6715	M	Jalisco		3 km S, El Grullo	8	4	1973								-104.219	19.7784
ENCB IPN	Leptonycteris yerbabuenae	6716	M	Jalisco		3 km S, El Grullo	8	4	1973								-104.219	19.7784
ENCB IPN	Leptonycteris yerbabuenae	6717	M	Jalisco		3 km S, El Grullo	8	4	1973								-104.219	19.7784
ENCB IPN	Leptonycteris yerbabuenae	6718	M	Jalisco		3 km S, El Grullo	8	4	1973								-104.219	19.7784
ENCB IPN	Leptonycteris yerbabuenae	6719	M	Jalisco		3 km S, El Grullo	8	4	1973								-104.219	19.7784
ENCB IPN	Leptonycteris yerbabuenae	6720	M	Jalisco		3 km S, El Grullo	8	4	1973								-104.219	19.7784
ENCB IPN	Leptonycteris yerbabuenae	6721	M	Jalisco		3 km S, El Grullo	8	4	1973								-104.219	19.7784
ENCB IPN	Leptonycteris yerbabuenae	6722	M	Jalisco		3 km S, El Grullo	8	4	1973								-104.219	19.7784
ENCB IPN	Leptonycteris yerbabuenae	6723	M	Jalisco		30 km NE, El Grullo	10	4	1973	1915							-104.016	19.997
ENCB IPN	Leptonycteris yerbabuenae	6724	M	Jalisco		30km NE, El Grullo	10	4	1973	1915							-104.016	19.997
ENCB IPN	Leptonycteris yerbabuenae	2218	M	Jalisco		500 m N, 3 km W Jamay	2	7	1960	1650							-102.739	20.3002
ENCB IPN	Leptonycteris yerbabuenae	2219	M	Jalisco		500 m N, 3 km W Jamay	2	7	1960	1650							-102.739	20.3002
ENCB IPN	Leptonycteris yerbabuenae	2220	M	Jalisco		500 m N, 3 km W Jamay	2	7	1960	1650							-102.739	20.3002
ENCB IPN	Leptonycteris yerbabuenae	2221	M	Jalisco		500 m N, 3 km W Jamay	2	7	1960	1650							-102.739	20.3002
ENCB IPN	Leptonycteris yerbabuenae	2222	H	Jalisco		500 m N, 3 km W Jamay	2	7	1960	1650							-102.739	20.3002
ENCB IPN	Leptonycteris yerbabuenae	2223	M	Jalisco		500 m N, 3 km W Jamay	2	7	1960	1650							-102.739	20.3002
ENCB IPN	Leptonycteris yerbabuenae	2224	M	Jalisco		500 m N, 3 km W Jamay	2	7	1960	1650							-102.739	20.3002
ENCB IPN	Leptonycteris yerbabuenae	2225	M	Jalisco		500 m N, 3 km W Jamay	2	7	1960	1650							-102.739	20.3002
ENCB IPN	Leptonycteris yerbabuenae	2226	H	Jalisco		500 m N, 3 km W Jamay	2	7	1960	1650							-102.739	20.3002
ENCB IPN	Leptonycteris yerbabuenae	2227	H	Jalisco		500 m N, 3 km W Jamay	2	7	1960	1650							-102.739	20.3002
ENCB IPN	Leptonycteris yerbabuenae	2228	H	Jalisco		500 m N, 3 km W Jamay	2	7	1960	1650							-102.739	20.3002
ENCB IPN	Leptonycteris yerbabuenae	2229	H	Jalisco		500 m N, 3 km W Jamay	2	7	1960	1650							-102.739	20.3002
ENCB IPN	Leptonycteris yerbabuenae	2230	H	Jalisco		500 m N, 3 km W Jamay	2	7	1960	1650							-102.739	20.3002
ENCB IPN	Leptonycteris yerbabuenae	2231	M	Jalisco		500 m N, 3 km W Jamay	2	7	1960	1650							-102.739	20.3002
ENCB IPN	Leptonycteris yerbabuenae	2232	M	Jalisco		500 m N, 3 km W Jamay	2	7	1960	1650							-102.739	20.3002
ENCB IPN	Leptonycteris yerbabuenae	2233	M	Jalisco		500 m N, 3 km W Jamay	2	7	1960	1650							-102.739	20.3002
ENCB IPN	Leptonycteris yerbabuenae	41514	H	Jalisco	La Huerta	Isla Panchito Bahía Chamela	19	4	2000								-104.643	19.4835
ENCB IPN	Leptonycteris yerbabuenae	41515	M	Jalisco	La Huerta	Isla Panchito Bahía Chamela	19	4	2000								-104.643	19.4835
ENCB IPN	Leptonycteris yerbabuenae	41516	M	Jalisco	La Huerta	Isla Panchito Bahía Chamela	19	4	2000								-104.643	19.4835
ENCB IPN	Leptonycteris yerbabuenae	41517	M	Jalisco	La Huerta	Isla Panchito Bahía Chamela	19	4	2000								-104.643	19.4835
ENCB IPN	Leptonycteris yerbabuenae	41517	M	Jalisco	La Huerta	Isla Panchito Bahía Chamela	19	4	2000								-104.643	19.4835
ENCB IPN	Leptonycteris yerbabuenae	41519	H	Jalisco	La Huerta	Isla Panchito Bahía Chamela	19	4	2000								-104.643	19.4835
ENCB IPN	Leptonycteris yerbabuenae	41520	M	Jalisco	La Huerta	Isla Panchito Bahía Chamela	19	4	2000								-104.643	19.4835
ENCB IPN	Leptonycteris yerbabuenae	41521	M	Jalisco	La Huerta	Isla Panchito Bahía Chamela	19	4	2000								-104.643	19.4835
ENCB IPN	Leptonycteris yerbabuenae	41522	M	Jalisco	La Huerta	Isla Panchito Bahía Chamela	19	4	2000								-104.643	19.4835
ENCB IPN	Leptonycteris yerbabuenae	38234	M	Jalisco		Bahía Chamela, 3 km N Chamela, 35 W	22	7	1994								-105.074	19.5534
ENCB IPN	Leptonycteris yerbabuenae	38235	M	Jalisco		Bahía Chamela, 3 km N Chamela, 35 W	22	7	1994								-105.074	19.5534
ENCB IPN	Leptonycteris yerbabuenae	38236	M	Jalisco		Bahia Chamela, 2.9 km N 0.5 km W Chamela	20	7	1994								-105.074	19.5534
ENCB IPN	Leptonycteris yerbabuenae	6190	H	Jalisco		3 km NW, Chamela	26	1	1972								-105.082	19.5368
ENCB IPN	Leptonycteris yerbabuenae	6191	M	Jalisco		3 km NW, Chamela	26	1	1972								-105.082	19.5368
ENCB IPN	Leptonycteris yerbabuenae	6192	H	Jalisco		3 km NW, Chamela	26	1	1972								-105.082	19.5368
ENCB IPN	Leptonycteris yerbabuenae	6193	M	Jalisco		3 km NW, Chamela	26	1	1972								-105.082	19.5368
ENCB IPN	Leptonycteris yerbabuenae	6194	H	Jalisco		3 km NW, Chamela	26	1	1972								-105.082	19.5368
ENCB IPN	Leptonycteris yerbabuenae	6195	H	Jalisco		3 km NW, Chamela	26	1	1972								-105.082	19.5368
ENCB IPN	Leptonycteris yerbabuenae	6196	H	Jalisco		3 km NW, Chamela	26	1	1972								-105.082	19.5368
ENCB IPN	Leptonycteris yerbabuenae	6197	M	Jalisco		3 km NW, Chamela	26	1	1972								-105.082	19.5368
ENCB IPN	Leptonycteris yerbabuenae	6198	M	Jalisco		3 km NW, Chamela	26	1	1972								-105.082	19.5368
ENCB IPN	Leptonycteris yerbabuenae	6199	M	Jalisco		3 km NW, Chamela	26	1	1972								-105.082	19.5368
ENCB IPN	Leptonycteris yerbabuenae	6200	M	Jalisco		3 km NW, Chamela	26	1	1972								-105.082	19.5368
ENCB IPN	Leptonycteris yerbabuenae	6201	H	Jalisco		3 km NW, Chamela	26	1	1972								-105.082	19.5368
ENCB IPN	Leptonycteris yerbabuenae	6202	H	Jalisco		3 km NW, Chamela	26	1	1972								-105.082	19.5368
ENCB IPN	Leptonycteris yerbabuenae	6203	H	Jalisco		3 km NW, Chamela	26	1	1972								-105.082	19.5368
ENCB IPN	Leptonycteris yerbabuenae	6204	H	Jalisco		3 km NW, Chamela	26	1	1972								-105.082	19.5368
ENCB IPN	Leptonycteris yerbabuenae	6205	M	Jalisco		3 km NW, Chamela	26	1	1972								-105.082	19.5368
ENCB IPN	Leptonycteris yerbabuenae	6206	H	Jalisco		3 km NW, Chamela	26	1	1972								-105.082	19.5368
ENCB IPN	Leptonycteris yerbabuenae	6207	M	Jalisco		3 km NW, Chamela	26	1	1972								-105.082	19.5368
ENCB IPN	Leptonycteris yerbabuenae	6712	M	Jalisco		3 km S El Grullo	8	4	1973								-104.219	19.7784
ENCB IPN	Leptonycteris yerbabuenae	6012	M	Michoacan	Boca de Apisa		21	1	1962								-103.73	18.68
ENCB IPN	Leptonycteris yerbabuenae	17190	M	Michoacan	Caleta de Campos		16	12	1979	10							-102.75	18.07
CNMA IB	Leptonycteris yerbabuenae	17193	M	Michoacan	Caleta de Campos												-102.75	18.07
CNMA IB	Leptonycteris yerbabuenae	30078	H	Michoacan	Caleta de Campos		16	12	1979	10							-102.75	18.07
CNMA IB	Leptonycteris yerbabuenae	30079	H	Michoacan	Caleta de Campos		16	12	1979	10							-102.75	18.07
CNMA IB	Leptonycteris yerbabuenae	30080	M	Michoacan	Caleta de Campos		16	12	1979	10							-102.75	18.07
CNMA IB	Leptonycteris yerbabuenae	30081	M	Michoacan	Caleta de Campos		16	12	1979	10							-102.75	18.07
CNMA IB	Leptonycteris yerbabuenae	30082	H	Michoacan	Caleta de Campos		16	12	1979	10							-102.75	18.07
CNMA IB	Leptonycteris yerbabuenae	30083	M	Michoacan	Caleta de Campos		16	12	1979	10							-102.75	18.07
CNMA IB	Leptonycteris yerbabuenae	30084	H	Michoacan	Caleta de Campos		16	12	1979	10							-102.75	18.07
CNMA IB	Leptonycteris yerbabuenae	30085	H	Michoacan	Caleta de Campos		16	12	1979	10							-102.75	18.07
CNMA IB	Leptonycteris yerbabuenae	7694	M	Michoacan	Briseñas		8	8	1963								-102.5	20.27
CNMA IB	Leptonycteris yerbabuenae	7695	M	Michoacan	Briseñas		5	7	1963								-102.5	20.27
CNMA IB	Leptonycteris yerbabuenae	17183	M	Michoacan	Lázaro Cárdenas	Río Popoyota	18	9	1979								-102.54	18.03
CNMA IB	Leptonycteris yerbabuenae	17184	H	Michoacan	Lázaro Cárdenas	Río Popoyota	25	11	1979								-102.54	18.03
CNMA IB	Leptonycteris yerbabuenae	17185	H	Michoacan	Lázaro Cárdenas	Río Popoyota	25	11	1979								-102.54	18.03
CNMA IB	Leptonycteris yerbabuenae	17186	H	Michoacan	Lázaro Cárdenas	Río Popoyota	25	11	1979								-102.54	18.03
CNMA IB	Leptonycteris yerbabuenae	17187	M	Michoacan	Lázaro Cárdenas	Río Popoyota	25	11	1979								-102.54	18.03
CNMA IB	Leptonycteris yerbabuenae	17188	H	Michoacan	Lázaro Cárdenas	Río Popoyota	25	11	1979								-102.54	18.03
CNMA IB	Leptonycteris yerbabuenae	17189	M	Michoacan	Lázaro Cárdenas	Río Popoyota	14	3	1980								-102.54	18.03
CNMA IB	Leptonycteris yerbabuenae	17191	M	Michoacan	Lázaro Cárdenas	Río Popoyota	17	4	1980								-102.54	18.03
CNMA IB	Leptonycteris yerbabuenae	17192	M	Michoacan	Lázaro Cárdenas	Río Popoyota	17	4	1980								-102.54	18.03
CNMA IB	Leptonycteris yerbabuenae	28346	H	Michoacan		6Km al NW Playa Azul	23	3	1979	30							-102.4	17.99
CNMA IB	Leptonycteris yerbabuenae	30074	M	Michoacan		6Km al NW Playa Azul	23	3	1979	30							-102.4	17.99
CNMA IB	Leptonycteris yerbabuenae	17180	M	Michoacan		6Km al NW Playa Azul	23	3	1979								-102.34	17.99
CNMA IB	Leptonycteris yerbabuenae	17181	M	Michoacan		6Km al NW Playa Azul	23	3	1979								-102.34	17.99
CNMA IB	Leptonycteris yerbabuenae	30067	H	Michoacan	Uruapan	Los Coyotes Km 258 Carretera Uruapan-Playa Azul	18	11	1987	570							-102.28	18.11
CNMA IB	Leptonycteris yerbabuenae	30068	H	Michoacan	Uruapan	Los Coyotes Km 258 Carretera Uruapan-Playa Azul	18	11	1987	570							-102.28	18.11
CNMA IB	Leptonycteris yerbabuenae	30069	H	Michoacan	Uruapan	Los Coyotes Km 258 Carretera Uruapan-Playa Azul	18	11	1987	570							-102.28	18.11
CNMA IB	Leptonycteris yerbabuenae	30070	M	Michoacan	Uruapan	Los Coyotes Km 258 Carretera Uruapan-Playa Azul	18	11	1987								-102.28	18.11
CNMA IB	Leptonycteris yerbabuenae	8585	H	Michoacan		20 Km El Infiernillo	29	11	1964								-100.542	19.0527
CNMA IB	Leptonycteris yerbabuenae	15689	M	Michoacan	Nueva Italia	Km 22o Carretera Nueva Italia Playa Azul, Rancho El Reparito	16	9	1976								-102.282	19.0215
CNMA IB	Leptonycteris yerbabuenae	15690	M	Michoacan	Nueva Italia	Km 22o Carretera Nueva Italia Playa Azul, Rancho El Reparito	16	9	1976								-102.282	19.0215
CNMA IB	Leptonycteris yerbabuenae	15691	M	Michoacan	Nueva Italia	Km 22o Carretera Nueva Italia Playa Azul, Rancho El Reparito	16	9	1976	190							-102.282	19.0215
CNMA IB	Leptonycteris yerbabuenae	15911	M	Michoacan	Nueva Italia	Km 22o Carretera Nueva Italia Playa Azul, Rancho El Reparito	29	11	1964								-102.282	19.0215
CNMA IB	Leptonycteris yerbabuenae	17194	M	Michoacan	Lázaro Cárdenas	Río Popoyota	17	4	1980								-102.4	18.281
CNMA IB	Leptonycteris yerbabuenae	17982	M	Michoacan	Lázaro Cárdenas	Río Popoyota	18	9	1979								-102.4	18.281
CNMA IB	Leptonycteris yerbabuenae	28347	H	Michoacan	Río Chocola		18	12	1979	10							-103.1	18.2
CNMA IB
CNMA IB	Leptonycteris yerbabuenae	30072	H	Michoacan	Río Chocola		18	12	1979	10							-103.1	18.2
	Leptonycteris yerbabuenae	30073	H	Michoacan	Río Chocola		18	12	1979	10							-103.1	18.2
CNMA IB	Leptonycteris yerbabuenae	30075	M	Michoacan		6Km al NW Playa Azul	23	3	1979	30							-102.384	18.0134
CNMA IB	Leptonycteris yerbabuenae	30076	M	Michoacan		6Km al NW Playa Azul	23	3	1979	30							-102.384	18.0134
CNMA IB	Leptonycteris yerbabuenae	30077	M	Michoacan		6Km al NW Playa Azul	23	3	1979								-102.384	18.0134
CNMA IB	Leptonycteris yerbabuenae	15165	M	MICHOACÁN		Palos Marías	14	1	1996	380	18	48	50	103	32	14	-103.537	18.8139
CNMA IB	Leptonycteris yerbabuenae	15166	M	MICHOACÁN		Paso de Arrieros	5	6	1996	270	18	54	18	103	24	54	-103.4	18.9
UAMI	Leptonycteris yerbabuenae	15167	M	MICHOACÁN		Paso de Arrieros	5	6	1996	270	18	54	18	103	24	54	-103.4	18.9
UAMI	Leptonycteris yerbabuenae	15163	M	MICHOACÁN		3 Km NW Aguililla	27	1	1995	780	18	46	14	102	45	44	-102.762	18.7706
UAMI	Leptonycteris yerbabuenae	15164	H	MICHOACÁN		3 Km NW Aguililla	27	1	1995	780	18	46	14	102	45	44	-102.762	18.7706
UAMI	Leptonycteris yerbabuenae	15851	M	MICHOACÁN		Centro recreativo Presa Pucuato	3	11	1994	2500	19	37		100	41.09		-100.685	19.6167
UAMI	Leptonycteris yerbabuenae	15852	M	MICHOACÁN		Centro recreativo Presa Pucuato	3	11	1994	2500	19	37		100	41.09		-100.685	19.6167
UAMI	Leptonycteris yerbabuenae	12426	M	Michoacán	Arteaga	Los Pozos , Cuesta de Novillo, Río Toxana	11	4	2011								-102.396	19.7869
UAMI	Leptonycteris yerbabuenae	26299	M	Michoacán		3 km S Los Reyes	3	9	1986	1360							-102.47	19.5608
Museo de Zoología FC	Leptonycteris yerbabuenae	26298	M	Michoacán		3 km S Los Reyes	3	9	1986	1360							-102.47	19.5608
ENCB IPN	Leptonycteris yerbabuenae	22015	M	Michoacán		3 km S Los Reyes	20	8	1985	1360							-102.47	19.5608
ENCB IPN	Leptonycteris yerbabuenae	22014	M	Michoacán		3 km S Los Reyes	20	8	1985	1360							-102.47	19.5608
ENCB IPN	Leptonycteris yerbabuenae	22013	M	Michoacán		3 km S Los Reyes	20	8	1985	1360							-102.47	19.5608
ENCB IPN	Leptonycteris yerbabuenae	22012	M	Michoacán		3 km S Los Reyes	20	8	1985	1360							-102.47	19.5608
ENCB IPN	Leptonycteris yerbabuenae	22011	H	Michoacán		Zamora	31	8	1985	1630							-102.283	19.9899
ENCB IPN	Leptonycteris yerbabuenae	26308	M	Michoacán	Huetamo	Santiago Conguripo, 12 km S, 21 km W	16	8	1986	180							-101.907	20.0753
ENCB IPN	Leptonycteris yerbabuenae	26307	M	Michoacán	Huetamo	Santiago Conguripo, 12 km S, 21 km W	16	8	1986	180							-101.907	20.0753
ENCB IPN	Leptonycteris yerbabuenae	26306	M	Michoacán	Huetamo	Santiago Conguripo, 12 km S, 21 km W	16	8	1986	180							-101.907	20.0753
ENCB IPN	Leptonycteris yerbabuenae	26305	H	Michoacán		18 km N, 12 km E, Coalcoman	18	4	1986	1480							-103.046	18.9372
ENCB IPN	Leptonycteris yerbabuenae	26304	H	Michoacán		18 km N, 12 km E, Coalcoman	18	4	1986	1480							-103.046	18.9372
ENCB IPN	Leptonycteris yerbabuenae	26303	H	Michoacán		18 km N, 12 km E, Coalcoman	18	4	1986	1480							-103.046	18.9372
ENCB IPN	Leptonycteris yerbabuenae	26302	M	Michoacán		18 km N, 12 km E, Coalcoman	18	4	1986	1480							-103.046	18.9372
ENCB IPN	Leptonycteris yerbabuenae	26301	M	Michoacán		1 km S, 6 km W Apatzingan	23	10	1986	310							-102.404	19.0699
ENCB IPN	Leptonycteris yerbabuenae	26300	M	Michoacán		13 km S, 7.5 km Tepalcatepec	17	10	1986	420							-102.774	19.072
ENCB IPN	Leptonycteris yerbabuenae	24299	M	Michoacán		1 km S, 6 km W Apatzingan	4	3	1986	310							-102.404	19.0699
ENCB IPN	Leptonycteris yerbabuenae	25323	M	Michoacán	Pátzcuaro	Janitzio, 4.5 km N, 4 km W	23	4	1986	2030							-101.689	19.615
ENCB IPN	Leptonycteris yerbabuenae	25322	M	Michoacán	Pátzcuaro	Janitzio, 4.5 km N, 4 km W	23	4	1986	2030							-101.689	19.615
ENCB IPN	Leptonycteris yerbabuenae	8362	H	Michoacán		18 km SE Caleta de Campos	18	2	1976								-102.623	17.9501
ENCB IPN	Leptonycteris yerbabuenae	8361	H	Michoacán		18 km SE Caleta de Campos	18	2	1976								-102.623	17.9501
ENCB IPN	Leptonycteris yerbabuenae	8360	M	Michoacán		18 km SE Caleta de Campos	18	2	1976								-102.623	17.9501
ENCB IPN	Leptonycteris yerbabuenae	8359	M	Michoacán		5 km NW, Caleta de Campos	12	2	1976								-102.789	18.1054
ENCB IPN	Leptonycteris yerbabuenae	8358	M	Michoacán		5 km NW, Caleta de Campos	12	2	1976								-102.789	18.1054
ENCB IPN	Leptonycteris yerbabuenae	8357	M	Michoacán		5 km NW, Caleta de Campos	12	2	1976								-102.789	18.1054
ENCB IPN	Leptonycteris yerbabuenae	8356	M	Michoacán		5 km NW, Caleta de Campos	12	2	1976								-102.789	18.1054
ENCB IPN	Leptonycteris yerbabuenae	8355	M	Michoacán		5 km NW, Caleta de Campos	12	2	1976								-102.789	18.1054
ENCB IPN	Leptonycteris yerbabuenae	8354	M	Michoacán		5 km NW, Caleta de Campos	12	2	1976								-102.789	18.1054
ENCB IPN	Leptonycteris yerbabuenae	8353	H	Michoacán		5 km NW, Caleta de Campos	12	2	1976								-102.789	18.1054
ENCB IPN	Leptonycteris yerbabuenae	8352	M	Michoacán		5 km NW, Caleta de Campos	12	2	1976								-102.789	18.1054
ENCB IPN	Leptonycteris yerbabuenae	8351	M	Michoacán		5 km NW, Caleta de Campos	12	2	1976								-102.789	18.1054
ENCB IPN	Leptonycteris yerbabuenae	1291	M	Morelos	Tequesquitengo	1Km S lago de Tequesquitengo, Cueva del Cerro Jojutla, Huajintlán 600 m NO	21	5	84	1050							-99.42	18.6
ENCB IPN	Leptonycteris yerbabuenae	4723	H	Morelos	Tequesquitengo	1Km S lago de Tequesquitengo, Cueva del Cerro Jojutla, Huajintlán 600 m NO	21	5	84	1050							-99.42	18.61
CNMA IB	Leptonycteris yerbabuenae	9087	M	Morelos	Tequesquitengo	Cueva de Cerro de Tequestiquengo	22	6	1965								-99.27	18.58
CNMA IB	Leptonycteris yerbabuenae	9426	M	Morelos	Tequesquitengo	Cueva de Cerro de Tequestiquengo	24	6	1965	840							-99.27	18.58
CNMA IB	Leptonycteris yerbabuenae	22545	H	Morelos	Tequesquitengo	1Km S lago de Tequesquitengo, Cueva del Cerro Jojutla, Huajintlán 600 m NO	21	5	84								-99.27	18.58
CNMA IB	Leptonycteris yerbabuenae	4721	M	Morelos	Tequesquitengo	Cueva de Cerro de Tequestiquengo	13	8	1956								-99.26	18.59
CNMA IB	Leptonycteris yerbabuenae	9880	H	Morelos	Tequesquitengo	Cueva de Cerro de Tequestiquengo	7	9	1966								-99.26	18.59
CNMA IB	Leptonycteris yerbabuenae	9882	H	Morelos	Tequesquitengo	Cueva de Cerro de Tequestiquengo	7	9	1966								-99.26	18.59
CNMA IB	Leptonycteris yerbabuenae	9884	H	Morelos	Tequesquitengo	Cueva de Cerro de Tequestiquengo	7	9	1966								-99.26	18.59
CNMA IB	Leptonycteris yerbabuenae	38923	H	Morelos	Tequesquitengo	Cueva de Cerro de Tequestiquengo	7	9	1996	840							-99.25	18.6
CNMA IB	Leptonycteris yerbabuenae	38924	M	Morelos	Tequesquitengo	Cueva de Cerro de Tequestiquengo	7	9	1996	840							-99.25	18.6
CNMA IB	Leptonycteris yerbabuenae	38925	M	Morelos	Tequesquitengo	Cueva de Cerro de Tequestiquengo	7	9	1996	840							-99.25	18.6
CNMA IB	Leptonycteris yerbabuenae	38926	H	Morelos	Jojutla	Cueva del Idolo, 1Km S Tequesquitengo, Jojutla-Juárez	7	9	1996								-99.25	18.6
CNMA IB	Leptonycteris yerbabuenae	38927	M	Morelos	Jojutla	Cueva del Idolo, 1Km S Tequesquitengo, Jojutla-Juárez	5	10	1996								-99.25	18.6
CNMA IB	Leptonycteris yerbabuenae	38928	H	Morelos	Jojutla	Cueva del Idolo, 1Km S Tequesquitengo, Jojutla-Juárez	5	10	1996								-99.25	18.6
CNMA IB	Leptonycteris yerbabuenae	38929	M	Morelos	Jojutla	Cueva del Idolo, 1Km S Tequesquitengo, Jojutla-Juárez	5	10	1996								-99.25	18.6
CNMA IB	Leptonycteris yerbabuenae	38930	M	Morelos	Jojutla	Cueva del Idolo, 1Km S Tequesquitengo, Jojutla-Juárez	5	10	1996								-99.25	18.6
CNMA IB	Leptonycteris yerbabuenae	38931	M	Morelos	Jojutla	Cueva del Idolo, 1Km S Tequesquitengo, Jojutla-Juárez	5	10	1996								-99.25	18.6
CNMA IB	Leptonycteris yerbabuenae	38932	M	Morelos	Jojutla	Cueva del Idolo, 1Km S Tequesquitengo, Jojutla-Juárez	5	10	1996								-99.25	18.6
CNMA IB	Leptonycteris yerbabuenae	38933	M	Morelos	Jojutla	Cueva del Idolo, 1Km S Tequesquitengo, Jojutla-Juárez	26	10	1996								-99.25	18.6
CNMA IB	Leptonycteris yerbabuenae	38934	M	Morelos	Jojutla	Cueva del Idolo, 1Km S Tequesquitengo, Jojutla-Juárez	26	10	1996								-99.25	18.6
CNMA IB	Leptonycteris yerbabuenae	38935	M	Morelos	Jojutla	Cueva del Idolo, 1Km S Tequesquitengo, Jojutla-Juárez	26	10	1996								-99.25	18.6
CNMA IB	Leptonycteris yerbabuenae	38936	H	Morelos	Jojutla	Cueva del Idolo, 1Km S Tequesquitengo, Jojutla-Juárez	26	10	1996								-99.25	18.6
CNMA IB	Leptonycteris yerbabuenae	2115	M	Morelos	Tetecalita	Cueva el Salitre cerca de Tetecalita	15	3	1955								-99.17	18.74
CNMA IB	Leptonycteris yerbabuenae	4724	H	Morelos	Tetecalita	Cueva el Salitre cerca de Tetecalita	14	3	1955	1152							-99.17	18.74
CNMA IB	Leptonycteris yerbabuenae	4725	H	Morelos	Tetecalita	Cueva el Salitre cerca de Tetecalita	14	3	1955	1152							-99.17	18.74
CNMA IB	Leptonycteris yerbabuenae	4726	M	Morelos	Tetecalita	Cueva el Salitre cerca de Tetecalita	14	3	1955	1152							-99.17	18.74
CNMA IB	Leptonycteris yerbabuenae	4727	H	Morelos	Tetecalita	Cueva el Salitre cerca de Tetecalita	14	3	1955	1152							-99.17	18.74
CNMA IB	Leptonycteris yerbabuenae	4728	H	Morelos	Tetecalita	Cueva el Salitre cerca de Tetecalita	15	3	1955								-99.17	18.74
CNMA IB	Leptonycteris yerbabuenae	4825	M	Morelos	Tetecalita	Cueva el Salitre cerca de Tetecalita	13	3	1955	1152							-99.17	18.74
CNMA IB	Leptonycteris yerbabuenae	6913	M	Morelos	Xochimancas	Cueva del Salitre, Xochimancas Morelos.	20	10	1962								-99.17	18.74
CNMA IB	Leptonycteris yerbabuenae	6914	M	Morelos	Xochimancas	Cueva del Salitre, Xochimancas Morelos.	20	10	1962								-99.17	18.74
CNMA IB	Leptonycteris yerbabuenae	6915	M	Morelos	Xochimancas	Cueva del Salitre, Xochimancas Morelos.	20	10	1962								-99.17	18.74
CNMA IB	Leptonycteris yerbabuenae	6916	M	Morelos	Xochimancas	Cueva del Salitre, Xochimancas Morelos.	28	10	1962								-99.17	18.74
CNMA IB	Leptonycteris yerbabuenae	6917	H	Morelos	Xochimancas	Cueva del Salitre, Xochimancas Morelos.	28	10	1962								-99.17	18.74
CNMA IB	Leptonycteris yerbabuenae	6918	M	Morelos	Xochimancas	Cueva del Salitre, Xochimancas Morelos.	28	10	1962								-99.17	18.74
CNMA IB	Leptonycteris yerbabuenae	6919	M	Morelos	Xochimancas	Cueva del Salitre, Xochimancas Morelos.	28	10	1962								-99.17	18.74
CNMA IB	Leptonycteris yerbabuenae	11344	M	Morelos	Tetecalita	Cueva el Salitre cerca de Tetecalita	15	12	1968								-99.17	18.74
CNMA IB	Leptonycteris yerbabuenae	11345	M	Morelos	Tetecalita	Cueva el Salitre cerca de Tetecalita	15	12	1968								-99.17	18.74
CNMA IB	Leptonycteris yerbabuenae	4621	H	MORELOS	Yautepec	1.5 Km E San Pablo, Hidalgo	17	3	1983		18	48	25	99	5	0	-99.0833	18.8069
CNMA IB	Leptonycteris yerbabuenae	22546	M	Morelos	Tepoztlán	8 Km NE de Tepoztlán	20	5	1984								-99.04	19.03
UAMI	Leptonycteris yerbabuenae	3721	H	Morelos	Tlayacapan	Tlayacapan	31	3	1984								-98.98	18.95
CNMA IB	Leptonycteris yerbabuenae	3723	M	Morelos	Tlayacapan	Tlayacapan	31	3	1984								-98.98	18.95
CNMA IB	Leptonycteris yerbabuenae	7424	H	Morelos	Jiutepec		23	4	1963								99.17	18.88
CNMA IB	Leptonycteris yerbabuenae	9981	H	Morelos	Tequesquitengo	Cueva de Cerro de Tequestiquengo	7	9	1966								-99.2718	18.5866
CNMA IB	Leptonycteris yerbabuenae	38922	H	Morelos	Tequesquitengo	Cueva de Cerro de Tequestiquengo	7	9	1996	840							-99.2718	18.5866
CNMA IB	Leptonycteris yerbabuenae	14730	M	Morelos	Tepalcingo	El Limón de Cuauchichinola	1	2	2014								-98.846	18.5955
CNMA IB	Leptonycteris yerbabuenae	14729	M	Morelos	Tepalcingo	El Limón de Cuauchichinola	1	2	2014								-98.846	18.5955
Museo de Zoología FC	Leptonycteris yerbabuenae	40136	H	Morelos		Cueva del Salitre 4 km NW Xochimecas	25	2	1997	1300							-99.1433	18.812
Museo de Zoología FC	Leptonycteris yerbabuenae	40135	H	Morelos		Cueva del Salitre 4 km NW Xochimecas	25	2	1997	1300							-99.1433	18.812
ENCB IPN	Leptonycteris yerbabuenae	40134	M	Morelos		Cueva del Salitre 4 km NW Xochimecas	25	2	1997	1300							-99.1433	18.812
ENCB IPN	Leptonycteris yerbabuenae	40133	M	Morelos		Cueva del Salitre 4 km NW Xochimecas	25	2	1997	1300							-99.1433	18.812
ENCB IPN	Leptonycteris yerbabuenae	401132	M	Morelos		Cueva del Salitre 4 km NW Xochimecas	25	2	1997	1300							-99.1433	18.812
ENCB IPN	Leptonycteris yerbabuenae	276	M	Morelos		Cueva del Salitre , 10 km N Tecuman	2	9	1958								-99.1433	18.812
ENCB IPN	Leptonycteris yerbabuenae	39166	H	Morelos		Cueva El Salitre, 4 km NW Xochimecas	5	2	1996	1300							-99.1433	18.812
ENCB IPN	Leptonycteris yerbabuenae	39165	H	Morelos		Cueva El Salitre, 4 km NW Xochimecas	5	2	1996	1300							-99.1433	18.812
ENCB IPN	Leptonycteris yerbabuenae	39164	H	Morelos		Cueva El Salitre, 4 km NW Xochimecas	5	2	1996	1300							-99.1433	18.812
ENCB IPN	Leptonycteris yerbabuenae	39163	M	Morelos		Cueva El Salitre, 4 km NW Xochimecas	5	2	1996	1300							-99.1433	18.812
ENCB IPN	Leptonycteris yerbabuenae	39162	M	Morelos		Cueva El Salitre, 4 km NW Xochimecas	5	2	1996	1300							-99.1433	18.812
ENCB IPN	Leptonycteris yerbabuenae	39161	H	Morelos		Cueva El Salitre, 4 km NW Xochimecas	5	2	1996	1300							-99.1433	18.812
ENCB IPN	Leptonycteris yerbabuenae	39160	M	Morelos		Cueva El Salitre, 4 km NW Xochimecas	5	2	1996	1300							-99.1433	18.812
ENCB IPN	Leptonycteris yerbabuenae	39159	M	Morelos		Cueva El Salitre, 4 km NW Xochimecas	5	2	1996	1300							-99.1433	18.812
ENCB IPN	Leptonycteris yerbabuenae	38158	M	Morelos		Cueva El Salitre, 4 km NW Xochimecas	5	2	1996	1300							-99.1433	18.812
ENCB IPN	Leptonycteris yerbabuenae	39157	M	Morelos		Cueva El Salitre, 4 km NW Xochimecas	5	2	1996	1300							-99.1433	18.812
ENCB IPN	Leptonycteris yerbabuenae	39156	M	Morelos		Cueva El Salitre, 4 km NW Xochimecas	5	2	1996	1300							-99.1433	18.812
ENCB IPN	Leptonycteris yerbabuenae	39180	M	Morelos		Cueva El Salitre, 4 km NW Xochimecas	5	2	1996	1300							-99.1433	18.812
ENCB IPN	Leptonycteris yerbabuenae	39179	M	Morelos		Cueva El Salitre, 4 km NW Xochimecas	5	2	1996	1300							-99.1433	18.812
ENCB IPN	Leptonycteris yerbabuenae	39178	M	Morelos		Cueva El Salitre, 4 km NW Xochimecas	5	2	1996	1300							-99.1433	18.812
ENCB IPN	Leptonycteris yerbabuenae	39177	M	Morelos		Cueva El Salitre, 4 km NW Xochimecas	5	2	1996	1300							-99.1433	18.812
ENCB IPN	Leptonycteris yerbabuenae	39176	M	Morelos		Cueva El Salitre, 4 km NW Xochimecas	5	2	1996	1300							-99.1433	18.812
ENCB IPN	Leptonycteris yerbabuenae	39175	H	Morelos		Cueva El Salitre, 4 km NW Xochimecas	10	2	1996	1300							-99.1433	18.812
ENCB IPN	Leptonycteris yerbabuenae	39173	H	Morelos		Cueva El Salitre, 4 km NW Xochimecas	5	2	1996	1300							-99.1433	18.812
ENCB IPN	Leptonycteris yerbabuenae	39172	M	Morelos		Cueva El Salitre, 4 km NW Xochimecas	5	2	1996	1300							-99.1433	18.812
ENCB IPN	Leptonycteris yerbabuenae	39171	H	Morelos		Cueva El Salitre, 4 km NW Xochimecas	5	2	1996	1300							-99.1433	18.812
ENCB IPN	Leptonycteris yerbabuenae	39170	H	Morelos		Cueva El Salitre, 4 km NW Xochimecas	5	2	1996	1300							-99.1433	18.812
ENCB IPN	Leptonycteris yerbabuenae	39169	M	Morelos		Cueva El Salitre, 4 km NW Xochimecas	5	2	1996	1300							-99.1433	18.812
ENCB IPN	Leptonycteris yerbabuenae	39168	M	Morelos		Cueva El Salitre, 4 km NW Xochimecas	5	2	1996	1300							-99.1433	18.812
ENCB IPN	Leptonycteris yerbabuenae	39167	M	Morelos		Cueva El Salitre, 4 km NW Xochimecas	5	2	1996	1300							-99.1433	18.812
ENCB IPN	Leptonycteris yerbabuenae	40157	H	Morelos		Cueva El Salitre, 4 km NW Xochimecas	25	3	1997	1300							-99.1433	18.812
ENCB IPN	Leptonycteris yerbabuenae	40156	M	Morelos		Cueva El Salitre, 4 km NW Xochimecas	25	3	1997	1300							-99.1433	18.812
ENCB IPN	Leptonycteris yerbabuenae	40155	H	Morelos		Cueva El Salitre, 4 km NW Xochimecas	25	3	1997	1300							-99.1433	18.812
ENCB IPN	Leptonycteris yerbabuenae	40154	M	Morelos		Cueva El Salitre, 4 km NW Xochimecas	25	3	1997	1300							-99.1433	18.812
ENCB IPN	Leptonycteris yerbabuenae	40149	M	Morelos		Cueva El Salitre, 4 km NW Xochimecas	1	3	1997	1300							-99.1433	18.812
ENCB IPN	Leptonycteris yerbabuenae	40148	H	Morelos		Cueva El Salitre, 4 km NW Xochimecas	1	3	1997	1300							-99.1433	18.812
ENCB IPN	Leptonycteris yerbabuenae	40147	M	Morelos		Cueva El Salitre, 4 km NW Xochimecas	1	3	1997	1300							-99.1433	18.812
ENCB IPN	Leptonycteris yerbabuenae	40146	H	Morelos		Cueva El Salitre, 4 km NW Xochimecas	1	3	1997	1300							-99.1433	18.812
ENCB IPN	Leptonycteris yerbabuenae	40145	M	Morelos		Cueva El Salitre, 4 km NW Xochimecas	1	3	1997	1300							-99.1433	18.812
ENCB IPN	Leptonycteris yerbabuenae	40144	M	Morelos		Cueva El Salitre, 4 km NW Xochimecas	1	3	1997	1300							-99.1433	18.812
ENCB IPN	Leptonycteris yerbabuenae	40138	H	Morelos		Cueva El Salitre, 4 km NW Xochimecas	1	3	1997	1300							-99.1433	18.812
ENCB IPN	Leptonycteris yerbabuenae	40137	M	Morelos		Cueva El Salitre, 4 km NW Xochimecas	1	3	1997	1300							-99.1433	18.812
ENCB IPN	Leptonycteris yerbabuenae	42662	M	Morelos		Cueva El Salitre, 4 km NW Xochimecas	29	3	2002	1300							-99.1433	18.812
ENCB IPN	Leptonycteris yerbabuenae	42661	M	Morelos		Cueva El Salitre, 4 km NW Xochimecas	29	3	2002	1300							-99.1433	18.812
ENCB IPN	Leptonycteris yerbabuenae	42660	M	Morelos		Cueva El Salitre, 4 km NW Xochimecas	29	3	2002	1300							-99.1433	18.812
ENCB IPN	Leptonycteris yerbabuenae	42659	M	Morelos		Cueva El Salitre, 4 km NW Xochimecas	29	3	2002	1300							-99.1433	18.812
ENCB IPN	Leptonycteris yerbabuenae	42658	M	Morelos		Cueva El Salitre, 4 km NW Xochimecas	29	3	2002	1300							-99.1433	18.812
ENCB IPN	Leptonycteris yerbabuenae	42657	Indefinido	Morelos		Cueva El Salitre, 4 km NW Xochimecas	29	3	2002	1300							-99.1433	18.812
ENCB IPN	Leptonycteris yerbabuenae	42656	Indefinido	Morelos		Cueva El Salitre, 4 km NW Xochimecas	2	3	2002	1300							-99.1433	18.812
ENCB IPN	Leptonycteris yerbabuenae	42655	Indefinido	Morelos		Cueva El Salitre, 4 km NW Xochimecas	2	3	2002	1300							-99.1433	18.812
ENCB IPN	Leptonycteris yerbabuenae	42654	Indefinido	Morelos		Cueva El Salitre, 4 km NW Xochimecas	2	3	2002	1300							-99.1433	18.812
ENCB IPN	Leptonycteris yerbabuenae	42653	Indefinido	Morelos		Cueva El Salitre, 4 km NW Xochimecas	2	3	2002	1300							-99.1433	18.812
ENCB IPN	Leptonycteris yerbabuenae	42652	Indefinido	Morelos		Cueva El Salitre, 4 km NW Xochimecas	2	3	2002	1300							-99.1433	18.812
ENCB IPN	Leptonycteris yerbabuenae	42651	M	Morelos		Cueva El Salitre, 4 km NW Xochimecas	2	3	2002	1300							-99.1433	18.812
ENCB IPN	Leptonycteris yerbabuenae	42650	M	Morelos		Cueva El Salitre, 4 km NW Xochimecas	2	3	2002	1300							-99.1433	18.812
ENCB IPN	Leptonycteris yerbabuenae	42676	H	Morelos		Cueva El Salitre, 4 km NW Xochimecas	28	4	2002	1300							-99.1433	18.812
ENCB IPN	Leptonycteris yerbabuenae	42675	H	Morelos		Cueva El Salitre, 4 km NW Xochimecas	28	4	2002	1300							-99.1433	18.812
ENCB IPN	Leptonycteris yerbabuenae	42674	M	Morelos		Cueva El Salitre, 4 km NW Xochimecas	28	4	2002	1300							-99.1433	18.812
ENCB IPN	Leptonycteris yerbabuenae	42673	M	Morelos		Cueva El Salitre, 4 km NW Xochimecas	28	4	2002	1300							-99.1433	18.812
ENCB IPN	Leptonycteris yerbabuenae	42672	H	Morelos		Cueva El Salitre, 4 km NW Xochimecas	28	4	2002	1300							-99.1433	18.812
ENCB IPN	Leptonycteris yerbabuenae	42671	H	Morelos		Cueva El Salitre, 4 km NW Xochimecas	28	4	2002	1300							-99.1433	18.812
ENCB IPN	Leptonycteris yerbabuenae	42670	M	Morelos		Cueva El Salitre, 4 km NW Xochimecas	27	4	2002	1300							-99.1433	18.812
ENCB IPN	Leptonycteris yerbabuenae	42669	M	Morelos		Cueva El Salitre, 4 km NW Xochimecas	27	4	2002	1300							-99.1433	18.812
ENCB IPN	Leptonycteris yerbabuenae	42668	M	Morelos		Cueva El Salitre, 4 km NW Xochimecas	27	4	2002	1300							-99.1433	18.812
ENCB IPN	Leptonycteris yerbabuenae	42667	M	Morelos		Cueva El Salitre, 4 km NW Xochimecas	27	4	2002	1300							-99.1433	18.812
ENCB IPN	Leptonycteris yerbabuenae	42665	H	Morelos		Cueva El Salitre, 4 km NW Xochimecas	29	4	2002	1300							-99.1433	18.812
ENCB IPN	Leptonycteris yerbabuenae	42664	M	Morelos		Cueva El Salitre, 4 km NW Xochimecas	29	4	2002	1300							-99.1433	18.812
ENCB IPN	Leptonycteris yerbabuenae	42663	M	Morelos		Cueva El Salitre, 4 km NW Xochimecas	29	4	2002	1300							-99.1433	18.812
ENCB IPN	Leptonycteris yerbabuenae	42688	M	Morelos		Cueva El Salitre, 4 km NW Xochimecas	22	6	2002	1300							-99.1433	18.812
ENCB IPN	Leptonycteris yerbabuenae	42687	M	Morelos		Cueva El Salitre, 4 km NW Xochimecas	22	6	2002	1300							-99.1433	18.812
ENCB IPN	Leptonycteris yerbabuenae	42686	M	Morelos		Cueva El Salitre, 4 km NW Xochimecas	22	6	2002	1300							-99.1433	18.812
ENCB IPN	Leptonycteris yerbabuenae	42685	M	Morelos		Cueva El Salitre, 4 km NW Xochimecas	26	5	2002	1300							-99.1433	18.812
ENCB IPN	Leptonycteris yerbabuenae	42684	H	Morelos		Cueva El Salitre, 4 km NW Xochimecas	26	5	2002	1300							-99.1433	18.812
ENCB IPN	Leptonycteris yerbabuenae	42683	M	Morelos		Cueva El Salitre, 4 km NW Xochimecas	26	5	2002	1300							-99.1433	18.812
ENCB IPN	Leptonycteris yerbabuenae	42682	M	Morelos		Cueva El Salitre, 4 km NW Xochimecas	26	5	2002	1300							-99.1433	18.812
ENCB IPN	Leptonycteris yerbabuenae	40106	M	Morelos		Cueva El Salitre, 4 km NW Xochimecas	23	6	1996	1300							-99.1433	18.812
ENCB IPN	Leptonycteris yerbabuenae	40105	M	Morelos		Cueva El Salitre, 4 km NW Xochimecas	23	6	1996	1300							-99.1433	18.812
ENCB IPN	Leptonycteris yerbabuenae	40104	H	Morelos		Cueva El Salitre, 4 km NW Xochimecas	23	6	1996	1300							-99.1433	18.812
ENCB IPN	Leptonycteris yerbabuenae	40103	H	Morelos		Cueva El Salitre, 4 km NW Xochimecas	23	6	1996	1300							-99.1433	18.812
ENCB IPN	Leptonycteris yerbabuenae	40100	M	Morelos		Cueva El Salitre, 4 km NW Xochimecas	11	5	1996	1300							-99.1433	18.812
ENCB IPN	Leptonycteris yerbabuenae	40099	M	Morelos		Cueva El Salitre, 4 km NW Xochimecas	11	5	1996	1300							-99.1433	18.812
ENCB IPN	Leptonycteris yerbabuenae	40098	H	Morelos		Cueva El Salitre, 4 km NW Xochimecas	11	5	1996	1300							-99.1433	18.812
ENCB IPN	Leptonycteris yerbabuenae	40177	H	Morelos		Cueva El Salitre, 4 km NW Xochimecas	27	6	1996	1300							-99.1433	18.812
ENCB IPN	Leptonycteris yerbabuenae	40166	H	Morelos		Cueva El Salitre, 4 km NW Xochimecas	27	6	1996	1300							-99.1433	18.812
ENCB IPN	Leptonycteris yerbabuenae	40115	H	Morelos		Cueva El Salitre, 4 km NW Xochimecas	27	6	1996	1300							-99.1433	18.812
ENCB IPN	Leptonycteris yerbabuenae	40114	H	Morelos		Cueva El Salitre, 4 km NW Xochimecas	27	6	1996	1300							-99.1433	18.812
ENCB IPN	Leptonycteris yerbabuenae	40113	H	Morelos		Cueva El Salitre, 4 km NW Xochimecas	27	6	1996	1300							-99.1433	18.812
ENCB IPN	Leptonycteris yerbabuenae	40107	H	Morelos		Cueva El Salitre, 4 km NW Xochimecas	23	6	1996	1300							-99.1433	18.812
ENCB IPN	Leptonycteris yerbabuenae	42681	M	Morelos		Cueva El Salitre, 4 km NW Xochimecas	26	5	2002	1300							-99.1433	18.812
ENCB IPN	Leptonycteris yerbabuenae	42680	M	Morelos		Cueva El Salitre, 4 km NW Xochimecas	26	5	2002	1300							-99.1433	18.812
ENCB IPN	Leptonycteris yerbabuenae	42679	H	Morelos		Cueva El Salitre, 4 km NW Xochimecas	26	5	2002	1300							-99.1433	18.812
ENCB IPN	Leptonycteris yerbabuenae	42678	M	Morelos		Cueva El Salitre, 4 km NW Xochimecas	26	5	2002	1300							-99.1433	18.812
ENCB IPN	Leptonycteris yerbabuenae	42677	M	Morelos		Cueva El Salitre, 4 km NW Xochimecas	26	5	2002	1300							-99.1433	18.812
ENCB IPN	Leptonycteris yerbabuenae	40102	M	Morelos		Cueva El Salitre, 4 km NW Xochimecas	11	5	1996	1300							-99.1433	18.812
ENCB IPN	Leptonycteris yerbabuenae	40101	H	Morelos		Cueva El Salitre, 4 km NW Xochimecas	11	5	1996	1300							-99.1433	18.812
ENCB IPN	Leptonycteris yerbabuenae	42694	M	Morelos		Cueva El Salitre, 4 km NW Xochimecas	22	6	2002	1300							-99.1433	18.812
ENCB IPN	Leptonycteris yerbabuenae	42693	M	Morelos		Cueva El Salitre, 4 km NW Xochimecas	22	6	2002	1300							-99.1433	18.812
ENCB IPN	Leptonycteris yerbabuenae	42692	M	Morelos		Cueva El Salitre, 4 km NW Xochimecas	22	6	2002	1300							-99.1433	18.812
ENCB IPN	Leptonycteris yerbabuenae	42691	M	Morelos		Cueva El Salitre, 4 km NW Xochimecas	22	6	2002	1300							-99.1433	18.812
ENCB IPN	Leptonycteris yerbabuenae	42690	M	Morelos		Cueva El Salitre, 4 km NW Xochimecas	22	6	2002	1300							-99.1433	18.812
ENCB IPN	Leptonycteris yerbabuenae	42689	M	Morelos		Cueva El Salitre, 4 km NW Xochimecas	22	6	2002	1300							-99.1433	18.812
ENCB IPN	Leptonycteris yerbabuenae	42699	M	Morelos		Cueva El Salitre, 4 km NW Xochimecas	22	6	2002	1300							-99.1433	18.812
ENCB IPN	Leptonycteris yerbabuenae	42698	H	Morelos		Cueva El Salitre, 4 km NW Xochimecas	26	5	2002	1300							-99.1433	18.812
ENCB IPN	Leptonycteris yerbabuenae	42697	M	Morelos		Cueva El Salitre, 4 km NW Xochimecas	22	6	2002	1300							-99.1433	18.812
ENCB IPN	Leptonycteris yerbabuenae	42696	M	Morelos		Cueva El Salitre, 4 km NW Xochimecas	22	6	2002	1300							-99.1433	18.812
ENCB IPN	Leptonycteris yerbabuenae	42695	M	Morelos		Cueva El Salitre, 4 km NW Xochimecas	26	5	2002	1300							-99.1433	18.812
ENCB IPN	Leptonycteris yerbabuenae	40108	H	Morelos		Cueva El Salitre, 4 km NW Xochimecas	31	8	1996	1300							-99.1433	18.812
ENCB IPN	Leptonycteris yerbabuenae	40143	M	Morelos		Cueva El Salitre, 4 km NW Xochimecas	30	8	1997	1300							-99.1433	18.812
ENCB IPN	Leptonycteris yerbabuenae	40142	H	Morelos		Cueva El Salitre, 4 km NW Xochimecas	30	8	1997	1300							-99.1433	18.812
ENCB IPN	Leptonycteris yerbabuenae	4014	H	Morelos		Cueva El Salitre, 4 km NW Xochimecas	30	8	1997	1300							-99.1433	18.812
ENCB IPN	Leptonycteris yerbabuenae	40140	H	Morelos		Cueva El Salitre, 4 km NW Xochimecas	30	8	1997	1300							-99.1433	18.812
ENCB IPN	Leptonycteris yerbabuenae	40139	H	Morelos		Cueva El Salitre, 4 km NW Xochimecas	30	8	1997	1300							-99.1433	18.812
ENCB IPN	Leptonycteris yerbabuenae	40150	M	Morelos		Cueva El Salitre, 4 km NW Xochimecas	2	8	1997	1300							-99.1433	18.812
ENCB IPN	Leptonycteris yerbabuenae	40158	H	Morelos		Cueva El Salitre, 4 km NW Xochimecas	2	8	1997	1300							-99.1433	18.812
ENCB IPN	Leptonycteris yerbabuenae	40153	M	Morelos		Cueva El Salitre, 4 km NW Xochimecas	2	8	1997	1300							-99.1433	18.812
ENCB IPN	Leptonycteris yerbabuenae	40152	M	Morelos		Cueva El Salitre, 4 km NW Xochimecas	2	8	1997	1300							-99.1433	18.812
ENCB IPN	Leptonycteris yerbabuenae	40151	M	Morelos		Cueva El Salitre, 4 km NW Xochimecas	2	8	1997	1300							-99.1433	18.812
ENCB IPN	Leptonycteris yerbabuenae	40125	M	Morelos		Cueva El Salitre, 4 km NW Xochimecas	26	10	1996	1300							-99.1433	18.812
ENCB IPN	Leptonycteris yerbabuenae	40124	M	Morelos		Cueva El Salitre, 4 km NW Xochimecas	26	10	1996	1300							-99.1433	18.812
ENCB IPN	Leptonycteris yerbabuenae	40123	M	Morelos		Cueva El Salitre, 4 km NW Xochimecas	26	10	1996	1300							-99.1433	18.812
ENCB IPN	Leptonycteris yerbabuenae	40122	M	Morelos		Cueva El Salitre, 4 km NW Xochimecas	26	10	1996	1300							-99.1433	18.812
ENCB IPN	Leptonycteris yerbabuenae	40121	M	Morelos		Cueva El Salitre, 4 km NW Xochimecas	28	9	1996	1300							-99.1433	18.812
ENCB IPN	Leptonycteris yerbabuenae	40120	M	Morelos		Cueva El Salitre, 4 km NW Xochimecas	28	9	1996	1300							-99.1433	18.812
ENCB IPN	Leptonycteris yerbabuenae	40119	M	Morelos		Cueva El Salitre, 4 km NW Xochimecas	28	9	1996	1300							-99.1433	18.812
ENCB IPN	Leptonycteris yerbabuenae	40118	M	Morelos		Cueva El Salitre, 4 km NW Xochimecas	28	9	1996	1300							-99.1433	18.812
ENCB IPN	Leptonycteris yerbabuenae	40112	H	Morelos		Cueva El Salitre, 4 km NW Xochimecas	31	8	1996	1300							-99.1433	18.812
ENCB IPN	Leptonycteris yerbabuenae	40111	H	Morelos		Cueva El Salitre, 4 km NW Xochimecas	31	8	1996	1300							-99.1433	18.812
ENCB IPN	Leptonycteris yerbabuenae	40110	H	Morelos		Cueva El Salitre, 4 km NW Xochimecas	31	8	1996	1300							-99.1433	18.812
ENCB IPN	Leptonycteris yerbabuenae	40109	H	Morelos		Cueva El Salitre, 4 km NW Xochimecas	31	8	1996	1300							-99.1433	18.812
ENCB IPN	Leptonycteris yerbabuenae	40131	H	Morelos		Cueva El Salitre, 4 km NW Xochimecas	30	11	1996	1300							-99.1433	18.812
ENCB IPN	Leptonycteris yerbabuenae	40424	H	Morelos		Cueva El Salitre, 4 km NW Xochimecas	24	10	1998	1300							-99.1433	18.812
ENCB IPN	Leptonycteris yerbabuenae	40616	M	Morelos		Cueva El Salitre, 4 km NW Xochimecas	30	1	1999	1300							-99.1433	18.812
ENCB IPN	Leptonycteris yerbabuenae	40130	H	Morelos		Cueva El Salitre, 4 km NW Xochimecas	30	11	1999	1300							-99.1433	18.812
ENCB IPN	Leptonycteris yerbabuenae	40129	M	Morelos		Cueva El Salitre, 4 km NW Xochimecas	30	11	1999	1300							-99.1433	18.812
ENCB IPN	Leptonycteris yerbabuenae	40128	M	Morelos		Cueva El Salitre, 4 km NW Xochimecas	30	11	1999	1300							-99.1433	18.812
ENCB IPN	Leptonycteris yerbabuenae	40127	M	Morelos		Cueva El Salitre, 4 km NW Xochimecas	30	11	1999	1300							-99.1433	18.812
ENCB IPN	Leptonycteris yerbabuenae	40126	M	Morelos		Cueva El Salitre, 4 km NW Xochimecas	26	10	1996	1300							-99.1433	18.812
ENCB IPN	Leptonycteris yerbabuenae	242	M	Morelos	Tequisquiapan	Cueva de la Calera S Tequisquiapan											-99.1433	18.812
ENCB IPN	Leptonycteris yerbabuenae	30086	M	Nayarit	Huajicori	Río del Bajar	26	5	1963								-105.31	22.63
ENCB IPN	Leptonycteris yerbabuenae	30331	M	Nayarit	Huajicori	Río del Bajar	26	5	1963								-105.31	22.63
CNMA IB	Leptonycteris yerbabuenae	29525	H	Nayarit	San Blas	Nayarit, 8mi SE San Blas	5	10	1960								-105.16	21.53
CNMA IB	Leptonycteris yerbabuenae	35002	M	Nayarit	Tepic	El Colorado de la Mora, 36.8Km E Tepic	25	8	1991	175							-104.64	21.71
CNMA IB	Leptonycteris yerbabuenae	35003	M	Nayarit	Tepic	El Colorado de la Mora, 36.8Km E Tepic	25	8	1991	175							-104.64	21.71
CNMA IB	Leptonycteris yerbabuenae	42714	M	NAYARIT		Huajicori	23	9	2002								-105.319	22.639
CNMA IB	Leptonycteris yerbabuenae	42715	H	NAYARIT		Huajicori	23	9	2002								-105.319	22.639
ENCB IPN	Leptonycteris yerbabuenae	42716	H	NAYARIT		Huajicori	23	9	2002								-105.319	22.639
ENCB IPN	Leptonycteris yerbabuenae	42717	M	NAYARIT		Huajicori	23	9	2002								-105.319	22.639
ENCB IPN	Leptonycteris yerbabuenae	42718	H	NAYARIT		Huajicori	23	9	2002								-105.319	22.639
ENCB IPN	Leptonycteris yerbabuenae	42719	M	NAYARIT		Huajicori	23	9	2002								-105.319	22.639
ENCB IPN	Leptonycteris yerbabuenae	42720	M	NAYARIT		Huajicori	23	9	2002								-105.319	22.639
ENCB IPN	Leptonycteris yerbabuenae	42721	H	NAYARIT		Huajicori	23	9	2002								-105.319	22.639
ENCB IPN	Leptonycteris yerbabuenae	42722	H	NAYARIT		Huajicori	23	9	2002								-105.319	22.639
ENCB IPN	Leptonycteris yerbabuenae	42723	H	NAYARIT		Huajicori	23	9	2002								-105.319	22.639
ENCB IPN	Leptonycteris yerbabuenae	42724	M	NAYARIT		Huajicori	23	9	2002								-105.319	22.639
ENCB IPN	Leptonycteris yerbabuenae	42725	M	NAYARIT		Huajicori	23	9	2002								-105.319	22.639
ENCB IPN	Leptonycteris yerbabuenae	42727	H	NAYARIT		Huajicori	23	9	2002								-105.319	22.639
ENCB IPN	Leptonycteris yerbabuenae	42728	H	NAYARIT		Huajicori	23	9	2002								-105.319	22.639
ENCB IPN	Leptonycteris yerbabuenae	42729	H	NAYARIT		Huajicori	23	9	2002								-105.319	22.639
ENCB IPN	Leptonycteris yerbabuenae	42730	M	NAYARIT		Huajicori	23	9	2002								-105.319	22.639
ENCB IPN	Leptonycteris yerbabuenae	42731	M	NAYARIT		Huajicori	23	9	2002								-105.319	22.639
ENCB IPN	Leptonycteris yerbabuenae	42732	H	NAYARIT		Huajicori	23	9	2002								-105.319	22.639
ENCB IPN	Leptonycteris yerbabuenae	41363	M	Nayarit		1 km N, 1 km W, Navarrete 40 m	29	8	1999								-105.129	21.6508
ENCB IPN	Leptonycteris yerbabuenae	41364	M	Nayarit		1 km N, 1 km W, Navarrete 40 m	29	8	1999								-105.129	21.6508
ENCB IPN	Leptonycteris yerbabuenae	41365	M	Nayarit		1 km N, 1 km W, Navarrete 40 m	29	8	1999								-105.129	21.6508
ENCB IPN	Leptonycteris yerbabuenae	41366	H	Nayarit		1 km N, 1 km W, Navarrete 40 m	29	8	1999								-105.129	21.6508
ENCB IPN	Leptonycteris yerbabuenae	41367	H	Nayarit		1 km N, 1 km W, Navarrete 40 m	29	8	1999								-105.129	21.6508
ENCB IPN	Leptonycteris yerbabuenae	41368	M	Nayarit		1 km N, 1 km W, Navarrete 40 m	29	8	1999								-105.129	21.6508
ENCB IPN	Leptonycteris yerbabuenae	4730	M	Nuevo Leon	Sierra Papagayos	Mina al W de Cerro Los Ramones, 10Km W Las Ramones	12	4	1956	1000							-99.7	25.69
ENCB IPN	Leptonycteris yerbabuenae	4732	H	Nuevo Leon	Sierra Papagayos	Mina al W de Cerro Los Ramones, 10Km W Las Ramones	19	3	1956								-99.7	25.69
CNMA IB	Leptonycteris yerbabuenae	4715	M	Nuevo Leon	Sierra Papagayos	8Km NNO Los Ramones, NL	17	5	1956								-99.7	25.7
CNMA IB	Leptonycteris yerbabuenae	4716	M	Nuevo Leon	Sierra Papagayos	8Km NNO Los Ramones, NL	17	5	1956								-99.7	25.7
CNMA IB	Leptonycteris yerbabuenae	4717	M	Nuevo Leon	Sierra Papagayos	8Km NNO Los Ramones, NL	17	5	1956								-99.7	25.7
CNMA IB	Leptonycteris yerbabuenae	4717	M	Nuevo Leon	Sierra Papagayos	8Km NNO Los Ramones, NL	17	5	1956								-99.7	25.7
CNMA IB	Leptonycteris yerbabuenae	4718	M	Nuevo Leon	Sierra Papagayos	8Km NNO Los Ramones, NL	17	5	1956								-99.7	25.7
CNMA IB	Leptonycteris yerbabuenae	4719	M	Nuevo Leon	Sierra Papagayos	8Km NNO Los Ramones, NL	17	5	1956								-99.7	25.7
CNMA IB	Leptonycteris yerbabuenae	4720	H	Nuevo Leon	Sierra Papagayos	8Km NNO Los Ramones, NL	17	5	1956								-99.7	25.7
CNMA IB	Leptonycteris yerbabuenae	45159	H	Oaxaca	Cosoltepec	Sabino Hueco, 3Km N, 5.75 Km W Cosoltepec	4	4	2007	1391	19	19	6	99	11	36	-99.1933	19.3183
CNMA IB	Leptonycteris yerbabuenae	45160	H	Oaxaca	Cosoltepec	Sabino Hueco, 3Km N, 5.75 Km W Cosoltepec	4	4	2007	1391	18	10	16	97	50	43.6	-97.8454	18.1711
CNMA IB	Leptonycteris yerbabuenae	45161	M	Oaxaca	Cosoltepec	Sabino Hueco, 3Km N, 5.75 Km W Cosoltepec	4	4	2007	1391	18	10	16	97	50	43.6	-97.8454	18.1711
CNMA IB	Leptonycteris yerbabuenae	45162	M	Oaxaca	Cosoltepec	Sabino Hueco, 3Km N, 5.75 Km W Cosoltepec	4	4	2007	1391	18	10	16	97	50	43.6	-97.8454	18.1711
CNMA IB	Leptonycteris yerbabuenae	45164	M	Oaxaca	Cosoltepec	Sabino Hueco, 3Km N, 5.75 Km W Cosoltepec	4	4	2007	1391	18	10	16	97	50	43.6	-97.8454	18.1711
CNMA IB	Leptonycteris yerbabuenae	45165	M	Oaxaca	Cosoltepec	Sabino Hueco, 3Km N, 5.75 Km W Cosoltepec	5	4	2007	1392	18	10	16	97	50	43.6	-97.8454	18.1711
CNMA IB	Leptonycteris yerbabuenae	45166	M	Oaxaca	Cosoltepec	Río Joluxtla, 1.25 Km N, 3.25 Km E Cosoltepec	12	8	2007	1591	18	10	16	97	50	43.6	-97.8454	18.1711
CNMA IB	Leptonycteris yerbabuenae	45169	H	Oaxaca	Cosoltepec	Rancho el Algodón, 1.25Km S. 1.14Km W. Cosoltepec	19	8	2006	1626	18	1	53.6	97	45	34.4	-97.7596	18.0316
CNMA IB	Leptonycteris yerbabuenae	45170	M	Oaxaca	Cosoltepec	Rancho el Algodón, 1.25Km S. 1.14Km W. Cosoltepec	19	8	2006	1626	18	1	53.6	97	45	34.4	-97.7596	18.0316
CNMA IB	Leptonycteris yerbabuenae	45171	M	Oaxaca	Cosoltepec	Rancho el Algodón, 1.25Km S. 1.14Km W. Cosoltepec	17	8	2006	1626	18	1	53.6	97	45	34.4	-97.7596	18.0316
CNMA IB	Leptonycteris yerbabuenae	45172	M	Oaxaca	Cosoltepec	1.87Km S, 1.25 Km W, Cosoltepec	16	8	2006		18	1	53.6	97	45	34.4	-97.7596	18.0316
CNMA IB	Leptonycteris yerbabuenae	45167	M	Oaxaca	Cosoltepec	Río Joluxtla, 1.25 Km N, 3.25 Km E Cosoltepec	12	8	2007	1591	18	9	16	97	45	34.4	-97.7596	18.1544
CNMA IB	Leptonycteris yerbabuenae	45168	M	Oaxaca	Cosoltepec	Rancho el Algodón, 1.25Km S. 1.14Km W. Cosoltepec	15	8	2006	1626	18	9	16	97	45	34.4	-97.7596	18.1544
CNMA IB	Leptonycteris yerbabuenae	39751	M	Oaxaca	San Juan Lajarcia		12	7	2000		18	21	23.046	97	26	0	-97.4333	18.3564
CNMA IB	Leptonycteris yerbabuenae	10171	M	OAXACA	Zaachila	Zaachila	14	7	1987		16	55	13	96	46	0	-96.7667	16.9203
CNMA IB	Leptonycteris yerbabuenae	39120	M	Oaxaca	Cacahuatepec	4mi SSW Cacahuatepec	27	7	1968	1000ft	16	29	11.068	95	53	0	-95.8833	16.4864
UAMI	Leptonycteris yerbabuenae	39746	H	Oaxaca	San Juan Lajarcia		12	7	2000		16	29	11.068	95	53	0	-95.8833	16.4864
CNMA IB	Leptonycteris yerbabuenae	39747	H	Oaxaca	San Juan Lajarcia		12	7	2000		16	29	11.068	95	53	0	-95.8833	16.4864
CNMA IB	Leptonycteris yerbabuenae	39748	M	Oaxaca	San Juan Lajarcia		12	7	2000		16	29	11.068	95	53	0	-95.8833	16.4864
CNMA IB	Leptonycteris yerbabuenae	39749	H	Oaxaca	San Juan Lajarcia		12	7	2000		16	29	11.068	95	53	0	-95.8833	16.4864
CNMA IB	Leptonycteris yerbabuenae	39750	H	Oaxaca	San Juan Lajarcia		12	7	2000		16	29	11.068	95	53	0	-95.8833	16.4864
CNMA IB	Leptonycteris yerbabuenae	10166	21 Individuos sin sexo	Oaxaca	Tequisistlán	Cuevas del Convento, 6Km NE Tequisistlan	15	9	1965								-95.56	16.43
CNMA IB	Leptonycteris yerbabuenae	1289	H	Oaxaca	Dominguillo	#km ONO Dominguillo	23	9	1998	730							-96.911	17.6448
CNMA IB	Leptonycteris yerbabuenae	1288	M	Oaxaca	Cuicatlán	Cuicatlán	13	9	1998	600							-96.9518	17.7988
CNMA IB	Leptonycteris yerbabuenae	1290	H	Oaxaca	Cuicatlán	Cuicatlán	13	9	1998	600							-96.9518	17.7988
CNMA IB	Leptonycteris yerbabuenae	41847	H	Oaxaca		3.3 km N, 5.8 km W, Tlacolula	11	9	2000								-96.5281	16.9833
CNMA IB	Leptonycteris yerbabuenae	10842	M	Oaxaca		Cuicatlán	7	4	1977	620							-96.9599	17.7998
ENCB IPN	Leptonycteris yerbabuenae	10841	H	Oaxaca		Cuicatlán	7	4	1977	620							-96.9599	17.7998
ENCB IPN	Leptonycteris yerbabuenae	10840	M	Oaxaca		Cuicatlán	7	4	1977	620							-96.9599	17.7998
ENCB IPN	Leptonycteris yerbabuenae	10839	M	Oaxaca		Cuicatlán	7	4	1977	620							-96.9599	17.7998
ENCB IPN	Leptonycteris yerbabuenae	10838	M	Oaxaca		2 km N Cuicatlán	5	4	1977	620							-96.9598	17.8178
ENCB IPN	Leptonycteris yerbabuenae	10393	M	Oaxaca	Santiago Chazumba	2 km SW, 50 N San Juan Nochixtlan	3	8	1998	1800							-97.6629	18.5453
ENCB IPN	Leptonycteris yerbabuenae	42784	M	Oaxaca		2.25 km N, 2.4 km W Valeria Trujano	21	3	2002	800							-97.6629	18.5453
ENCB IPN	Leptonycteris yerbabuenae	42782	M	Oaxaca		2.25 km N, 2.4 km W Valeria Trujano	13	3	2002	800							-97.6629	18.5453
ENCB IPN	Leptonycteris yerbabuenae	42781	H	Oaxaca		2.25 km N, 2.4 km W Valeria Trujano	13	3	2002	800							-97.6629	18.5453
ENCB IPN	Leptonycteris yerbabuenae	42780	M	Oaxaca		2.25 km N, 2.4 km W Valeria Trujano	21	3	2002	800							-97.6629	18.5453
ENCB IPN	Leptonycteris yerbabuenae	40429	H	Puebla	Tenampulco	Cueva de las Vegas, 2.5 Km, 0.5Km W, Tenampulco	30	6	1999		19	7.5	0	104	27.8	0	-104.463	19.1
ENCB IPN	Leptonycteris yerbabuenae	11689	M	PUEBLA	Jolalpan	Cueva Tzinacanostoc, 8 Km NW Jolalpan	13	11	1993	950	18	15	25	98	50	50	-98.8472	18.2569
CNMA IB	Leptonycteris yerbabuenae	11690	H	PUEBLA	Jolalpan	Cueva Tzinacanostoc, 8 Km NW Jolalpan	14	1	1993	950	18	15	25	98	50	50	-98.8472	18.2569
UAMI	Leptonycteris yerbabuenae	11691	M	PUEBLA	Jolalpan	Cueva Tzinacanostoc, 8 Km NW Jolalpan	14	11	1993	950	18	15	25	98	50	50	-98.8472	18.2569
UAMI	Leptonycteris yerbabuenae	14772	H	PUEBLA	Jolalpan	Cueva Tzinacanostoc, 8 Km NW Jolalpan	16	11	1996	950	18	19	50	98	50	30	-98.8417	18.3306
UAMI	Leptonycteris yerbabuenae	14773	H	PUEBLA	Jolalpan	Cueva Tzinacanostoc, 8 Km NW Jolalpan	16	11	1996	950	18	19	50	98	50	30	-98.8417	18.3306
UAMI	Leptonycteris yerbabuenae	14774	H	PUEBLA	Jolalpan	Cueva Tzinacanostoc, 8 Km NW Jolalpan	16	11	1996	950	18	19	50	98	50	30	-98.8417	18.3306
UAMI	Leptonycteris yerbabuenae	14775	H	PUEBLA	Jolalpan	Cueva Tzinacanostoc, 8 Km NW Jolalpan	19	1	1998	950	18	19	50	98	50	30	-98.8417	18.3306
UAMI	Leptonycteris yerbabuenae	14776	H	PUEBLA	Jolalpan	Cueva Tzinacanostoc, 8 Km NW Jolalpan	19	1	1998	950	18	19	50	98	50	30	-98.8417	18.3306
UAMI	Leptonycteris yerbabuenae	14777	H	PUEBLA	Jolalpan	Cueva Tzinacanostoc, 8 Km NW Jolalpan	19	1	1998	950	18	19	50	98	50	30	-98.8417	18.3306
UAMI	Leptonycteris yerbabuenae	14778	H	PUEBLA	Jolalpan	Cueva Tzinacanostoc, 8 Km NW Jolalpan	19	1	1998	950	18	19	50	98	50	30	-98.8417	18.3306
UAMI	Leptonycteris yerbabuenae	14779	M	PUEBLA	Jolalpan	Cueva Tzinacanostoc, 8 Km NW Jolalpan	13	2	1998	950	18	19	50	98	50	30	-98.8417	18.3306
UAMI	Leptonycteris yerbabuenae	14780	H	PUEBLA	Jolalpan	Cueva Tzinacanostoc, 8 Km NW Jolalpan	13	2	1998	950	18	19	50	98	50	30	-98.8417	18.3306
UAMI	Leptonycteris yerbabuenae	14781	H	PUEBLA	Jolalpan	Cueva Tzinacanostoc, 8 Km NW Jolalpan	13	2	1998	950	18	19	50	98	50	30	-98.8417	18.3306
UAMI	Leptonycteris yerbabuenae	14782	H	PUEBLA	Jolalpan	Cueva Tzinacanostoc, 8 Km NW Jolalpan	13	2	1998	950	18	19	50	98	50	30	-98.8417	18.3306
UAMI	Leptonycteris yerbabuenae	14783	H	PUEBLA	Jolalpan	Cueva Tzinacanostoc, 8 Km NW Jolalpan	13	2	1998	950	18	19	50	98	50	30	-98.8417	18.3306
UAMI	Leptonycteris yerbabuenae	14784	M	PUEBLA	Jolalpan	Cueva Tzinacanostoc, 8 Km NW Jolalpan	13	2	1998	950	18	19	50	98	50	30	-98.8417	18.3306
UAMI	Leptonycteris yerbabuenae	14785	M	PUEBLA	Jolalpan	Cueva Tzinacanostoc, 8 Km NW Jolalpan	10	12	1998	950	18	19	50	98	50	30	-98.8417	18.3306
UAMI	Leptonycteris yerbabuenae	14786	M	PUEBLA	Jolalpan	Cueva Tzinacanostoc, 8 Km NW Jolalpan	10	12	1998	950	18	19	50	98	50	30	-98.8417	18.3306
UAMI	Leptonycteris yerbabuenae	14787	M	PUEBLA	Jolalpan	Cueva Tzinacanostoc, 8 Km NW Jolalpan	20	5	1999	950	18	19	50	98	50	30	-98.8417	18.3306
UAMI	Leptonycteris yerbabuenae	14788	H	PUEBLA	Jolalpan	Cueva Tzinacanostoc, 8 Km NW Jolalpan	20	5	1999	950	18	19	50	98	50	30	-98.8417	18.3306
UAMI	Leptonycteris yerbabuenae	14789	H	PUEBLA	Jolalpan	Cueva Tzinacanostoc, 8 Km NW Jolalpan	20	5	1999	950	18	19	50	98	50	30	-98.8417	18.3306
UAMI	Leptonycteris yerbabuenae	14790	M	PUEBLA	Jolalpan	Cueva Tzinacanostoc, 8 Km NW Jolalpan	20	5	1999	950	18	19	50	98	50	30	-98.8417	18.3306
UAMI	Leptonycteris yerbabuenae	14791	H	PUEBLA	Jolalpan	Cueva Tzinacanostoc, 8 Km NW Jolalpan	20	5	1999	950	18	19	50	98	50	30	-98.8417	18.3306
UAMI	Leptonycteris yerbabuenae	14792	M	PUEBLA	Jolalpan	Cueva Tzinacanostoc, 8 Km NW Jolalpan	20	5	1999	950	18	19	50	98	50	30	-98.8417	18.3306
UAMI	Leptonycteris yerbabuenae	14793	H	PUEBLA	Jolalpan	Cueva Tzinacanostoc, 8 Km NW Jolalpan	11	9	1999	950	18	19	50	98	50	30	-98.8417	18.3306
UAMI	Leptonycteris yerbabuenae	14794	H	PUEBLA	Jolalpan	Cueva Tzinacanostoc, 8 Km NW Jolalpan	11	9	1999	950	18	19	50	98	50	30	-98.8417	18.3306
UAMI	Leptonycteris yerbabuenae	14795	H	PUEBLA	Jolalpan	Cueva Tzinacanostoc, 8 Km NW Jolalpan	11	9	1999	950	18	19	50	98	50	30	-98.8417	18.3306
UAMI	Leptonycteris yerbabuenae	14796	H	PUEBLA	Jolalpan	Cueva Tzinacanostoc, 8 Km NW Jolalpan	11	9	1999	950	18	19	50	98	50	30	-98.8417	18.3306
UAMI	Leptonycteris yerbabuenae	14797	H	PUEBLA	Jolalpan	Cueva Tzinacanostoc, 8 Km NW Jolalpan	11	9	1999	950	18	19	50	98	50	30	-98.8417	18.3306
UAMI	Leptonycteris yerbabuenae	14798	H	PUEBLA	Jolalpan	Cueva Tzinacanostoc, 8 Km NW Jolalpan	11	9	1999	950	18	19	50	98	50	30	-98.8417	18.3306
UAMI	Leptonycteris yerbabuenae	14799	H	PUEBLA	Jolalpan	Cueva Tzinacanostoc, 8 Km NW Jolalpan	10	9	1999	950	18	19	50	98	50	30	-98.8417	18.3306
UAMI	Leptonycteris yerbabuenae	2974	M	PUEBLA	Chiautla de Tapia	1 Km NW Huehuetlán El Chico	3	7	1980	1030	18	22	10	98	42	30	-98.7083	18.3694
UAMI	Leptonycteris yerbabuenae	2575	M	PUEBLA	Jolalpan	5 Km W Jolalpan	5	7	1980	1030	18	19	10	98	41	15	-98.68	18.3194
UAMI	Leptonycteris yerbabuenae	294	H	PUEBLA	Atzala	5 Km S Tilapa	26	8	1977	1230	18	32	8	98	32	15	-98.53	18.5356
UAMI	Leptonycteris yerbabuenae	295	M	PUEBLA	Atzala	5 Km S Tilapa	26	8	1977	1230	18	32	8	98	32	15	-98.53	18.5356
UAMI	Leptonycteris yerbabuenae	2976	?	PUEBLA	Tehuitzingo	0.5 Km N El Márquez	7	7	1980	1080	18	23	35	98	18	15	-98.3042	18.3931
UAMI	Leptonycteris yerbabuenae	9616	M	PUEBLA	Huehuetlán	Huehuetlán El Grande	12	10	1988	1350	18	43	6	98	9	45	-98.16	18.7183
UAMI	Leptonycteris yerbabuenae	9617	M	PUEBLA	Huehuetlán	Huehuetlán El Grande	12	10	1988	1350	18	43	6	98	9	45	-98.16	18.7183
UAMI	Leptonycteris yerbabuenae	9618	M	PUEBLA	Huehuetlán	Huehuetlán El Grande	12	10	1988	1350	18	43	6	98	9	45	-98.16	18.7183
UAMI	Leptonycteris yerbabuenae	9619	M	PUEBLA	Huehuetlán	Huehuetlán El Grande	13	10	1988	1350	18	43	6	98	9	45	-98.16	18.7183
UAMI	Leptonycteris yerbabuenae	11683	M	PUEBLA	Pahuatlán	4 Km N Pahuatlán	24	8	1993	720	20	19	10	98	9	0	-98	20.3194
UAMI	Leptonycteris yerbabuenae	11684	H	PUEBLA	Pahuatlán	4 Km N Pahuatlán	24	8	1993	720	20	19	10	98	9	0	-98	20.3194
UAMI	Leptonycteris yerbabuenae	11685	H	PUEBLA	Pahuatlán	4 Km N Pahuatlán	24	8	1993	720	20	19	10	98	9	0	-98	20.3194
UAMI	Leptonycteris yerbabuenae	11686	M	PUEBLA	Pahuatlán	4 Km N Pahuatlán	24	8	1993	720	20	19	10	98	9	0	-98	20.3194
UAMI	Leptonycteris yerbabuenae	9538	M	PUEBLA	Zacapala	Zacapala	12	9	1988	2350	18	35	15	98	3	45	-98.06	18.58
UAMI	Leptonycteris yerbabuenae	9539	M	PUEBLA	Zacapala	Zacapala	12	9	1988	2350	18	35	15	98	3	45	-98.06	18.58
UAMI	Leptonycteris yerbabuenae	285	M	PUEBLA	Acatlán de Osorio	Buenavista, 3 Km E Acatlán de Osorio	24	8	1977	1150	18	12	31	98	3	0	-98	18.2086
UAMI	Leptonycteris yerbabuenae	5211	M	PUEBLA	Jonotla	2 Km S Jonotla	27	4	1984	1030	20	3	6	97	37	10	-97.6194	20.0517
UAMI	Leptonycteris yerbabuenae	2975	M	PUEBLA	Tenampulco	4 Km NE Santiago Yancuictlalpan	3	5	1980	400	20	4	42	97	27	6	-97.4517	20.0783
UAMI	Leptonycteris yerbabuenae	20451	M	Puebla	Zapotitlán de las Salinas	Río Zapotitlán	1	4	1984								-97.44	18.32
UAMI	Leptonycteris yerbabuenae	20458	M	Puebla	Zapotitlán de las Salinas	Zapotitlán de las Salinas	31	3	1984								-97.44	18.32
CNMA IB	Leptonycteris yerbabuenae	20459	M	Puebla	Zapotitlán de las Salinas	Zapotitlán de las Salinas	1	4	1984								-97.44	18.32
CNMA IB	Leptonycteris yerbabuenae	10728	M	PUEBLA	Tenampulco	Cueva El Zapote, 3 Km S, 1 Km W Tenampulco	7	4	1989	250	19	59	46	97	25	0	-97.4167	19.9961
CNMA IB	Leptonycteris yerbabuenae	10729	M	PUEBLA	Tenampulco	Cueva El Zapote, 3 Km S, 1 Km W Tenampulco	11	3	1989	250	19	59	46	97	25	0	-97.4167	19.9961
UAMI	Leptonycteris yerbabuenae	10730	M	PUEBLA	Tenampulco	Cueva El Zapote, 3 Km S, 1 Km W Tenampulco	11	3	1989	250	19	59	46	97	25	0	-97.4167	19.9961
UAMI	Leptonycteris yerbabuenae	10731	H	PUEBLA	Tenampulco	Cueva El Zapote, 3 Km S, 1 Km W Tenampulco	11	3	1989	250	19	59	46	97	25	0	-97.4167	19.9961
UAMI	Leptonycteris yerbabuenae	10732	M	PUEBLA	Tenampulco	Cueva El Zapote, 3 Km S, 1 Km W Tenampulco	11	3	1989	250	19	59	46	97	25	0	-97.4167	19.9961
UAMI	Leptonycteris yerbabuenae	10733	H	PUEBLA	Tenampulco	Cueva El Zapote, 3 Km S, 1 Km W Tenampulco	11	3	1989	250	19	59	46	97	25	0	-97.4167	19.9961
UAMI	Leptonycteris yerbabuenae	10734	M	PUEBLA	Tenampulco	Cueva El Zapote, 3 Km S, 1 Km W Tenampulco	11	3	1989	250	19	59	46	97	25	0	-97.4167	19.9961
UAMI	Leptonycteris yerbabuenae	10735	H	PUEBLA	Tenampulco	Cueva El Zapote, 3 Km S, 1 Km W Tenampulco	11	3	1989	250	19	59	46	97	25	0	-97.4167	19.9961
UAMI	Leptonycteris yerbabuenae	10736	M	PUEBLA	Tenampulco	Cueva El Zapote, 3 Km S, 1 Km W Tenampulco	11	3	1989	250	19	59	46	97	25	0	-97.4167	19.9961
UAMI	Leptonycteris yerbabuenae	10737	M	PUEBLA	Tenampulco	Cueva El Zapote, 3 Km S, 1 Km W Tenampulco	11	3	1989	250	19	59	46	97	25	0	-97.4167	19.9961
UAMI	Leptonycteris yerbabuenae	10738	H	PUEBLA	Tenampulco	Cueva El Zapote, 3 Km S, 1 Km W Tenampulco	11	3	1989	250	19	59	46	97	25	0	-97.4167	19.9961
UAMI	Leptonycteris yerbabuenae	11687	H	PUEBLA	Tenampulco	Cueva El Zapote, 3 Km S, 1 Km W Tenampulco	11	3	1989	250	19	59	46	97	25	0	-97.4167	19.9961
UAMI	Leptonycteris yerbabuenae	39752	H	Puebla	Zapotitlán de las Salinas	5Km SE, San Antonio Texcala	10	7	2000		20	8.8	0	97	24.61	0	-97.4102	20.1467
UAMI	Leptonycteris yerbabuenae	10727	M	PUEBLA	Hueytamalco	Rancho Las Margaritas, 9 Km N Hueytamalco	8	4	1989	600	20	1	45	97	15	45	-97.26	20.0292
CNMA IB	Leptonycteris yerbabuenae	286	M	PUEBLA	Ajalpan	8 Km NE Ajalpan	10	8	1977	1310	18	24	17	97	14	30	-97.2417	18.4047
UAMI	Leptonycteris yerbabuenae	287	M	PUEBLA	Ajalpan	8 Km NE Ajalpan	12	8	1977	1310	18	24	17	97	14	30	-97.2417	18.4047
UAMI	Leptonycteris yerbabuenae	288	M	PUEBLA	Ajalpan	8 Km NE Ajalpan	12	8	1977	1310	18	24	17	97	14	30	-97.2417	18.4047
UAMI	Leptonycteris yerbabuenae	289	M	PUEBLA	Ajalpan	8 Km NE Ajalpan	13	8	1977	1310	18	24	17	97	14	30	-97.2417	18.4047
UAMI	Leptonycteris yerbabuenae	290	M	PUEBLA	Ajalpan	8 Km NE Ajalpan	13	8	1977	1310	18	24	17	97	14	30	-97.2417	18.4047
UAMI	Leptonycteris yerbabuenae	291	M	PUEBLA	Ajalpan	8 Km NE Ajalpan	13	8	1977	1310	18	24	17	97	14	30	-97.2417	18.4047
UAMI	Leptonycteris yerbabuenae	292	H	PUEBLA	Ajalpan	8 Km NE Ajalpan	13	8	1977	1310	18	24	17	97	14	30	-97.2417	18.4047
UAMI	Leptonycteris yerbabuenae	16427	H	PUEBLA		Cueva del Santuario, 1 Km SW Zinacatepec	24	4	2005		18	19	32.5	97	14	18.5	-97.2385	18.3257
UAMI	Leptonycteris yerbabuenae	16428	H	PUEBLA		Cueva del Santuario, 1 Km SW Zinacatepec	24	4	2005		18	19	32.5	97	14	18.5	-97.2385	18.3257
UAMI	Leptonycteris yerbabuenae	16429	M	PUEBLA		Cueva del Santuario, 1 Km SW Zinacatepec	24	4	2005		18	19	32.5	97	14	18.5	-97.2385	18.3257
UAMI	Leptonycteris yerbabuenae	16430	M	PUEBLA		Cueva del Santuario, 1 Km SW Zinacatepec	24	4	2005		18	19	32.5	97	14	18.5	-97.2385	18.3257
UAMI	Leptonycteris yerbabuenae	16431	M	PUEBLA		Cueva del Santuario, 1 Km SW Zinacatepec	24	4	2005		18	19	32.5	97	14	18.5	-97.2385	18.3257
UAMI	Leptonycteris yerbabuenae	16432	H	PUEBLA		Cueva del Santuario, 1 Km SW Zinacatepec	24	4	2005		18	19	32.5	97	14	18.5	-97.2385	18.3257
UAMI	Leptonycteris yerbabuenae	16433	M	PUEBLA		Cueva del Santuario, 1 Km SW Zinacatepec	24	4	2005		18	19	32.5	97	14	18.5	-97.2385	18.3257
UAMI	Leptonycteris yerbabuenae	16434	H	PUEBLA		Cueva del Santuario, 1 Km SW Zinacatepec	24	4	2005		18	19	32.5	97	14	18.5	-97.2385	18.3257
UAMI	Leptonycteris yerbabuenae	16435	H	PUEBLA		Cueva del Santuario, 1 Km SW Zinacatepec	24	4	2005		18	19	32.5	97	14	18.5	-97.2385	18.3257
UAMI	Leptonycteris yerbabuenae	16436	M	PUEBLA		Cueva del Santuario, 1 Km SW Zinacatepec	24	4	2005		18	19	32.5	97	14	18.5	-97.2385	18.3257
UAMI	Leptonycteris yerbabuenae	16437	M	PUEBLA		Cueva del Santuario, 1 Km SW Zinacatepec	24	4	2005		18	19	32.5	97	14	18.5	-97.2385	18.3257
UAMI	Leptonycteris yerbabuenae	16438	H	PUEBLA		Cueva del Santuario, 1 Km SW Zinacatepec	24	4	2005		18	19	32.5	97	14	18.5	-97.2385	18.3257
UAMI	Leptonycteris yerbabuenae	16439	M	PUEBLA		Cueva del Santuario, 1 Km SW Zinacatepec	24	4	2005		18	19	32.5	97	14	18.5	-97.2385	18.3257
UAMI	Leptonycteris yerbabuenae	16440	M	PUEBLA		Cueva del Santuario, 1 Km SW Zinacatepec	24	4	2005		18	19	32.5	97	14	18.5	-97.2385	18.3257
UAMI	Leptonycteris yerbabuenae	16441	H	PUEBLA		Cueva del Santuario, 1 Km SW Zinacatepec	24	4	2005		18	19	32.5	97	14	18.5	-97.2385	18.3257
UAMI	Leptonycteris yerbabuenae	16442	H	PUEBLA		Cueva del Santuario, 1 Km SW Zinacatepec	24	4	2005		18	19	32.5	97	14	18.5	-97.2385	18.3257
UAMI	Leptonycteris yerbabuenae	16443	H	PUEBLA		Cueva del Santuario, 1 Km SW Zinacatepec	24	4	2005		18	19	32.5	97	14	18.5	-97.2385	18.3257
UAMI	Leptonycteris yerbabuenae	16354	M	PUEBLA		3.5 Km E Ajalpan	13	10	2004	1290	18	22	46.6	97	13	32.7	-97.225	18.3796
UAMI	Leptonycteris yerbabuenae	16426	H	PUEBLA		3.5 Km NE Ajalpan	22	4	2005	1290	18	22	46.6	97	13	32.7	-97.225	18.3796
UAMI	Leptonycteris yerbabuenae	293	H	PUEBLA	Coxcatlán	8 Km S Coxcatlán	15	8	1977	830	18	11	40	97	9	30	-97.1583	18.1944
UAMI	Leptonycteris yerbabuenae	16132	M	Puebla	Hueytamalco	Rancho Las Margaritas	19	8	1975								-97.2747	19.9893
UAMI	Leptonycteris yerbabuenae	20435	M	Puebla	Zapotitlán de las Salinas	Zapotitlán de las Salinas	1	4	1984								-97.4747	18.3291
CNMA IB	Leptonycteris yerbabuenae	21953	M	Puebla	Zapotitlán de las Salinas	La Huerta	19	9	1984								-97.4767	18.3311
CNMA IB	Leptonycteris yerbabuenae	2262	M	Puebla		6 km SE Totimehuacan	15	5	1966	2100							-98.1502	18.9368
CNMA IB	Leptonycteris yerbabuenae	28484	M	Puebla		4 km NW Atlixco	27	9	1987	1960							-98.4836	18.9319
ENCB IPN	Leptonycteris yerbabuenae	20023	M	Querétaro	San Juan del Río	10Km NE de San Juan del Río	9	7	1983								-99.92	20.45
ENCB IPN	Leptonycteris yerbabuenae	20024	M	Querétaro	San Juan del Río	10Km NE de San Juan del Río	9	7	1983								-99.92	20.45
CNMA IB	Leptonycteris yerbabuenae	20025	M	Querétaro	San Juan del Río	10Km NE de San Juan del Río	9	7	1983								-99.92	20.45
CNMA IB	Leptonycteris yerbabuenae	20026	H	Querétaro	San Juan del Río	10Km NE de San Juan del Río	9	7	1983								-99.92	20.45
CNMA IB	Leptonycteris yerbabuenae	20027	M	Querétaro	San Juan del Río	10Km NE de San Juan del Río	9	7	1983								-99.92	20.45
CNMA IB	Leptonycteris yerbabuenae	20029	H	Querétaro	San Juan del Río	Entre San Juan del Río y Tequisquiapan	9	7	1983								-99.92	20.45
CNMA IB	Leptonycteris yerbabuenae	20030	H	Querétaro	San Juan del Río	Entre San Juan del Río y Tequisquiapan	9	7	1983								-99.92	20.45
CNMA IB	Leptonycteris yerbabuenae	20031	M	Querétaro	San Juan del Río	10 KmNE San Juan del Río	9	7	1983								-99.92	20.45
CNMA IB	Leptonycteris yerbabuenae	20032	H	Querétaro	San Juan del Río	Entre San Juan del Río y Tequisquiapan	9	7	1983								-99.92	20.45
CNMA IB	Leptonycteris yerbabuenae	29527	M	Querétaro	Peña Blanca	8.2mi S, Peña Blanca	3	6	1979								-99.73	20.91
CNMA IB	Leptonycteris yerbabuenae	20028	H	Querétaro	Río Jalpan	14 Km N de Jalpan, Río Jalpan	5	7	1983								-99.47	21.34
CNMA IB	Leptonycteris yerbabuenae	36997	H	Querétaro	Cadereyta	3Km SE, La Vega	18	6	1993								-99.8669	20.5113
CNMA IB	Leptonycteris yerbabuenae	36998	M	Querétaro	Cadereyta	2Km SE El Palmar, Mpio Cadereyta	19	7	1991								-99.6957	20.6785
CNMA IB	Leptonycteris yerbabuenae	3625	H	Querétaro	Tequisquiapan	5 km SW Tequisquiapan	7	7	1984								-99.9194	20.4847
CNMA IB	Leptonycteris yerbabuenae	851	M	Querétaro	Peñamiller		25	5	1983								-99.8154	21.0527
Museo de Zoología FC	Leptonycteris yerbabuenae	852	M	Querétaro	Peñamiller		25	5	1983								-99.8154	21.0527
Museo de Zoología FC	Leptonycteris yerbabuenae	3627	M	Querétaro	Tequisquiapan	5 km SW Tequisquiapan	7	7	1984								-99.9194	20.4847
Museo de Zoología FC	Leptonycteris yerbabuenae	3631	H	Querétaro	Tequisquiapan		7	7	1984								-99.885	20.5165
Museo de Zoología FC	Leptonycteris yerbabuenae	862	M	Querétaro	Landa de Matamoros	1/2 km E Santa Inés	26	9	1983								-99.121	21.1735
Museo de Zoología FC	Leptonycteris yerbabuenae	858	H	Querétaro	Landa de Matamoros	Santa Inés	31	7	1982								-99.1257	21.1741
Museo de Zoología FC	Leptonycteris yerbabuenae	881	H	Querétaro	Peñamiller		11	9	1982								-99.8154	21.0527
Museo de Zoología FC	Leptonycteris yerbabuenae	859	M	Querétaro	Peñamiller		28	2	1983								-99.8154	21.0527
Museo de Zoología FC	Leptonycteris yerbabuenae	857	M	Querétaro	Landa de Matamoros	Santa Inés	2	8	1982								-99.1257	21.1741
Museo de Zoología FC	Leptonycteris yerbabuenae	856	M	Querétaro	Landa de Matamoros	Santa Inés	2	8	1982								-99.1257	21.1741
Museo de Zoología FC	Leptonycteris yerbabuenae	882	M	Querétaro	Peñamiller		11	9	1982								-99.8154	21.0527
Museo de Zoología FC	Leptonycteris yerbabuenae	884	M testículos escrotados	Querétaro	Peñamiller		11	9	1982								-99.8154	21.0527
Museo de Zoología FC	Leptonycteris yerbabuenae	883	M	Querétaro	Peñamiller		11	9	1982								-99.8154	21.0527
Museo de Zoología FC	Leptonycteris yerbabuenae	871	M	Querétaro	Peñamiller		25	5	1983								-99.8154	21.0527
Museo de Zoología FC	Leptonycteris yerbabuenae	7383	H	Querétaro	Tolimán	Rancho Ojo de agua 5 km NW Bomintza	11	6	1997								-99.3813	20.0917
Museo de Zoología FC	Leptonycteris yerbabuenae	7384	H	Querétaro	Tolimán	Rancho Ojo de agua	9	6	1997								-100.39	20.5888
Museo de Zoología FC	Leptonycteris yerbabuenae	3629	H	Querétaro	Tequisquiapan	5 km SW de Tequisquiapan	7	6	1984								-99.9194	20.4847
Museo de Zoología FC	Leptonycteris yerbabuenae	7232	M	Querétaro	Cadereyta de Montes	La Florida	5	3	1997								-100.41	20.5986
Museo de Zoología FC	Leptonycteris yerbabuenae	3624	M	Querétaro	Tequisquiapan	5 km SW de Tequisquiapan	7	7	1984								-99.9194	20.4847
Museo de Zoología FC	Leptonycteris yerbabuenae	3637	H	Querétaro	Tequisquiapan	5 km SW de Tequisquiapan	7	7	1984								-99.9194	20.4847
Museo de Zoología FC	Leptonycteris yerbabuenae	3636	M	Querétaro	Tequisquiapan	5 km SE de Tequisquiapan	7	7	1984								-99.8507	20.4864
Museo de Zoología FC	Leptonycteris yerbabuenae	7231	M	Querétaro	Cadereyta de Montes	La Florida	4	3	1997								-100.41	20.5986
Museo de Zoología FC	Leptonycteris yerbabuenae	3638	M	Querétaro	Ezequiel Montes	Peña Bernal	19	5	1986								-99.9486	20.7477
Museo de Zoología FC	Leptonycteris yerbabuenae	7382	H	Querétaro	Cadereyta de Montes	Higuerillas 4 km W	5	6	1997								-99.8758	20.9075
Museo de Zoología FC	Leptonycteris yerbabuenae	850	M	Querétaro	Peñamiller		25	5	1983								-99.8154	21.0527
Museo de Zoología FC	Leptonycteris yerbabuenae	853	M	Querétaro	Peñamiller		25	5	1983								-99.8154	21.0527
Museo de Zoología FC	Leptonycteris yerbabuenae	879	M	Querétaro	Peñamiller		26	5	1983								-99.8154	21.0527
Museo de Zoología FC	Leptonycteris yerbabuenae	877	M	Querétaro	Peñamiller		26	5	1983								-99.8154	21.0527
Museo de Zoología FC	Leptonycteris yerbabuenae	3628	H	Querétaro	Tequisquiapan	5 km SW Tequisquiapan	7	7	1984								-99.9194	20.4847
Museo de Zoología FC	Leptonycteris yerbabuenae	864	M	Querétaro	Peñamiller	14.4 km SE Peña Blanca	29	8	1983								-99.6996	21.0047
Museo de Zoología FC	Leptonycteris yerbabuenae	863	M	Querétaro	Peñamiller	14.4 km SE Peña Blanca	29	8	1983								-99.6996	21.0047
Museo de Zoología FC	Leptonycteris yerbabuenae	861	M	Querétaro	Landa de Matamoros	Santa Inés	26	9	1982								-99.1257	21.1741
Museo de Zoología FC	Leptonycteris yerbabuenae	878	M	Querétaro	Peñamiller	Peña Blanca	26	5	1983								-99.7304	21.0309
Museo de Zoología FC	Leptonycteris yerbabuenae	855	M	Querétaro	Peñamiller		29	8	1983								-99.8154	21.0527
Museo de Zoología FC	Leptonycteris yerbabuenae	874	H	Querétaro	Landa de Matamoros	500 m E Santa Inés	26	9	1983								-99.1212	21.1764
Museo de Zoología FC	Leptonycteris yerbabuenae	876	M	Querétaro	Peñamiller		26	5	1983								-99.8154	21.0527
Museo de Zoología FC	Leptonycteris yerbabuenae	860	M	Querétaro	Landa de Matamoros	1/2 km E Santa Inés	26	9	1983								-99.121	21.1735
Museo de Zoología FC	Leptonycteris yerbabuenae	14216	M	Querétaro		2 km E Decomi	2	4	1979	1800
Museo de Zoología FC	Leptonycteris yerbabuenae	18015	H	Querétaro	Tequisquiapan	2.5 km N, 5.7 km E Tequisquiapan	15	8	1983								-99.8309	20.5388
ENCB IPN	Leptonycteris yerbabuenae	18014	H	Querétaro	Tequisquiapan	2.5 km N, 5.7 km E Tequisquiapan	15	8	1983								-99.8309	20.5388
ENCB IPN	Leptonycteris yerbabuenae	18013	H	Querétaro	Tequisquiapan	2.5 km N, 5.7 km E Tequisquiapan	15	8	1983								-99.8309	20.5388
ENCB IPN	Leptonycteris yerbabuenae	18012	M	Querétaro	Tequisquiapan	2.5 km N, 5.7 km E Tequisquiapan	15	8	1983								-99.8309	20.5388
ENCB IPN	Leptonycteris yerbabuenae	18011	H	Querétaro	Tequisquiapan	2.5 km N, 5.7 km E Tequisquiapan	15	8	1983								-99.8309	20.5388
ENCB IPN	Leptonycteris yerbabuenae	18010	H	Querétaro	Tequisquiapan	2.5 km N, 5.7 km E Tequisquiapan	15	8	1983								-99.8309	20.5388
ENCB IPN	Leptonycteris yerbabuenae	18009	H	Querétaro	Tequisquiapan	2.5 km N, 5.7 km E Tequisquiapan	15	8	1983								-99.8309	20.5388
ENCB IPN	Leptonycteris yerbabuenae	10276	M	SAN LUIS POTOSÍ	Matehuala	21.4 Km S Matehuala	6	4	1979	1480	23	39	0	100	39	25	-100.657	23
ENCB IPN	Leptonycteris yerbabuenae	10277	M	SAN LUIS POTOSÍ	Matehuala	21.4 Km S Matehuala	6	4	1979	1480	23	39	0	100	39	25	-100.657	23
UAMI	Leptonycteris yerbabuenae	10278	H	SAN LUIS POTOSÍ	Matehuala	21.4 Km S Matehuala	6	4	1979	1480	23	39	0	100	39	25	-100.657	23
UAMI	Leptonycteris yerbabuenae	10279	M	SAN LUIS POTOSÍ	Matehuala	21.4 Km S Matehuala	6	4	1979	1480	23	39	0	100	39	25	-100.657	23
UAMI	Leptonycteris yerbabuenae	10280	M	SAN LUIS POTOSÍ	Matehuala	21.4 Km S Matehuala	6	4	1979	1480	23	39	0	100	39	25	-100.657	23
UAMI	Leptonycteris yerbabuenae	10281	M	SAN LUIS POTOSÍ	Matehuala	21.4 Km S Matehuala	6	4	1979	1480	23	39	0	100	39	25	-100.657	23
UAMI	Leptonycteris yerbabuenae	10282	M	SAN LUIS POTOSÍ	Matehuala	21.4 Km S Matehuala	6	4	1979	1540	23	39	0	100	39	25	-100.657	23
UAMI	Leptonycteris yerbabuenae	10283	M	SAN LUIS POTOSÍ	Matehuala	21.4 Km S Matehuala	6	4	1979	1480	23	39	0	100	39	25	-100.657	23
UAMI	Leptonycteris yerbabuenae	10284	H	SAN LUIS POTOSÍ	Matehuala	21.4 Km S Matehuala	6	4	1979	1480	23	39	0	100	39	25	-100.657	23
UAMI	Leptonycteris yerbabuenae	10285	M	SAN LUIS POTOSÍ	Matehuala	21.4 Km S Matehuala	6	4	1979	1480	23	39	0	100	39	25	-100.657	23
UAMI	Leptonycteris yerbabuenae	10286	M	SAN LUIS POTOSÍ	Matehuala	21.4 Km S Matehuala	6	4	1979	1480	23	39	0	100	39	25	-100.657	23
UAMI	Leptonycteris yerbabuenae	10287	M	SAN LUIS POTOSÍ	Matehuala	21.4 Km S Matehuala	6	4	1979	1480	23	39	0	100	39	25	-100.657	23
UAMI	Leptonycteris yerbabuenae	10288	M	SAN LUIS POTOSÍ	Matehuala	21.4 Km S Matehuala	6	4	1979	1480	23	39	0	100	39	25	-100.657	23
UAMI	Leptonycteris yerbabuenae	10289	M	SAN LUIS POTOSÍ	Matehuala	21.4 Km S Matehuala	6	4	1979	1480	23	39	0	100	39	25	-100.657	23
UAMI	Leptonycteris yerbabuenae	10290	M	SAN LUIS POTOSÍ	Matehuala	21.4 Km S Matehuala	6	4	1979	1480	23	39	0	100	39	25	-100.657	23
UAMI	Leptonycteris yerbabuenae	10291	M	SAN LUIS POTOSÍ	Matehuala	21.4 Km S Matehuala	6	4	1979	1480	23	39	0	100	39	25	-100.657	23
UAMI	Leptonycteris yerbabuenae	10292	H	SAN LUIS POTOSÍ	Matehuala	21.4 Km S Matehuala	6	4	1979	1480	23	39	0	100	39	25	-100.657	23
UAMI	Leptonycteris yerbabuenae	841	M	SAN LUIS POTOSÍ	Ciudad del Maíz	2 Km E El Custodio	23	8	1971	1100	22	38	20	99	56	30	-99.9417	22.6389
UAMI	Leptonycteris yerbabuenae	842	H	SAN LUIS POTOSÍ	Ciudad del Maíz	2 Km E El Custodio	23	8	1971	1100	22	38	20	99	56	30	-99.9417	22.6389
UAMI	Leptonycteris yerbabuenae	843	M	SAN LUIS POTOSÍ	Ciudad del Maíz	2 Km E El Custodio	23	8	1971	1100	22	38	20	99	56	30	-99.9417	22.6389
UAMI	Leptonycteris yerbabuenae	844	H	SAN LUIS POTOSÍ	Ciudad del Maíz	2 Km E El Custodio	23	8	1971	1100	22	38	20	99	56	30	-99.9417	22.6389
UAMI	Leptonycteris yerbabuenae	845	M	SAN LUIS POTOSÍ	Ciudad del Maíz	2 Km E El Custodio	23	8	1971	1100	22	38	20	99	56	30	-99.9417	22.6389
UAMI	Leptonycteris yerbabuenae	10274	H	SAN LUIS POTOSÍ	Ciudad del Maíz	2 Km E El Custodio	23	8	1971	1100	22	38	20	99	56	30	-99.9417	22.6389
UAMI	Leptonycteris yerbabuenae	10275	H	SAN LUIS POTOSÍ	Ciudad del Maíz	2 Km E El Custodio	23	8	1971	1100	22	38	20	99	56	30	-99.9417	22.6389
UAMI	Leptonycteris yerbabuenae	5912	H	SAN LUIS POTOSÍ		2km E El Custodio	23	8	1971	1100m							-99.9417	22.6389
UAMI	Leptonycteris yerbabuenae	5913	H	SAN LUIS POTOSÍ		2km E El Custodio	23	8	1971	1100m							-99.9417	22.6389
ENCB IPN	Leptonycteris yerbabuenae	5914	M	SAN LUIS POTOSÍ		2km E El Custodio	23	8	1971	1100m							-99.9417	22.6389
ENCB IPN	Leptonycteris yerbabuenae	5915	H	SAN LUIS POTOSÍ		2km E El Custodio	23	8	1971	1100m							-99.9417	22.6389
ENCB IPN	Leptonycteris yerbabuenae	5916	M	SAN LUIS POTOSÍ		2km E El Custodio	23	8	1971	1100m							-99.9417	22.6389
ENCB IPN	Leptonycteris yerbabuenae	5917	M	SAN LUIS POTOSÍ		2km E El Custodio	23	8	1971	1100m							-99.9417	22.6389
ENCB IPN	Leptonycteris yerbabuenae	5918	M	SAN LUIS POTOSÍ		2km E El Custodio	23	8	1971	1100m							-99.9417	22.6389
ENCB IPN	Leptonycteris yerbabuenae	5919	M	SAN LUIS POTOSÍ		2km E El Custodio	23	8	1971	1100m							-99.9417	22.6389
ENCB IPN	Leptonycteris yerbabuenae	5920	M	SAN LUIS POTOSÍ		2km E El Custodio	23	8	1971	1100m							-99.9417	22.6389
ENCB IPN	Leptonycteris yerbabuenae	5921	H	SAN LUIS POTOSÍ		2km E El Custodio	23	8	1971	1100m							-99.9417	22.6389
ENCB IPN	Leptonycteris yerbabuenae	5922	H	SAN LUIS POTOSÍ		2km E El Custodio	23	8	1971	1100m							-99.9417	22.6389
ENCB IPN	Leptonycteris yerbabuenae	5923	H	SAN LUIS POTOSÍ		2km E El Custodio	23	8	1971	1100m							-99.9417	22.6389
ENCB IPN	Leptonycteris yerbabuenae	5924	M	SAN LUIS POTOSÍ		2km E El Custodio	23	8	1971	1100m							-99.9417	22.6389
ENCB IPN	Leptonycteris yerbabuenae	5925	H	SAN LUIS POTOSÍ		2km E El Custodio	23	8	1971	1100m							-99.9417	22.6389
ENCB IPN	Leptonycteris yerbabuenae	5926	H	SAN LUIS POTOSÍ		10km SW, Villa Arista	10	8	1971								-100.918	22.5824
ENCB IPN	Leptonycteris yerbabuenae	32066		SAN LUIS POTOSÍ		4km S, 10km W	14	4	1989	2100m
ENCB IPN	Leptonycteris yerbabuenae	34383	H	SAN LUIS POTOSÍ		1km N, Apetzco	13	8	1989	840m							-98.9896	21.3765
ENCB IPN	Leptonycteris yerbabuenae	34384	H	SAN LUIS POTOSÍ		1km N, Apetzco	13	8	1989	840m							-98.9896	21.3765
ENCB IPN	Leptonycteris yerbabuenae	34385	H	SAN LUIS POTOSÍ		1km N, Apetzco	13	8	1989	840m							-98.9896	21.3765
ENCB IPN	Leptonycteris yerbabuenae	33690	M	SAN LUIS POTOSÍ		1km N, Apetzco	13	8	1989	840m							-98.9896	21.3765
ENCB IPN	Leptonycteris yerbabuenae	8882	M	San Luis Potosí	Santa Catarina		21	1	1999								-99.4959	21.6342
ENCB IPN	Leptonycteris yerbabuenae	14108	M	San Luis Potosí	Matehuala	21.4 km S de Matehuala	1	4	1979	1480							-100.643	23.4512
Museo de Zoología FC	Leptonycteris yerbabuenae	14109	M	San Luis Potosí	Matehuala	21.4 km S de Matehuala	1	4	1979	1480							-100.643	23.4512
ENCB IPN	Leptonycteris yerbabuenae	14110	M	San Luis Potosí	Matehuala	21.4 km S de Matehuala	1	4	1979	1480							-100.643	23.4512
ENCB IPN	Leptonycteris yerbabuenae	14111	H	San Luis Potosí	Matehuala	21.4 km S de Matehuala	1	4	1979	1480							-100.643	23.4512
ENCB IPN	Leptonycteris yerbabuenae	14112	H	San Luis Potosí	Matehuala	21.4 km S de Matehuala	1	4	1979	1480							-100.643	23.4512
ENCB IPN	Leptonycteris yerbabuenae	14113	M	San Luis Potosí	Matehuala	21.4 km S de Matehuala	1	4	1979	1480							-100.643	23.4512
ENCB IPN	Leptonycteris yerbabuenae	14114	M	San Luis Potosí	Matehuala	21.4 km S de Matehuala	1	4	1979	1480							-100.643	23.4512
ENCB IPN	Leptonycteris yerbabuenae	14115	M	San Luis Potosí	Matehuala	21.4 km S de Matehuala	1	4	1979	1480							-100.643	23.4512
ENCB IPN	Leptonycteris yerbabuenae	14116	M	San Luis Potosí	Matehuala	21.4 km S de Matehuala	1	4	1979	1480							-100.643	23.4512
ENCB IPN	Leptonycteris yerbabuenae	14117	H	San Luis Potosí	Matehuala	21.4 km S de Matehuala	1	4	1979	1480							-100.643	23.4512
ENCB IPN	Leptonycteris yerbabuenae	14118	H	San Luis Potosí	Matehuala	21.4 km S de Matehuala	1	4	1979	1480							-100.643	23.4512
ENCB IPN	Leptonycteris yerbabuenae	14119	H	San Luis Potosí	Matehuala	21.4 km S de Matehuala	1	4	1979	1480							-100.643	23.4512
ENCB IPN	Leptonycteris yerbabuenae	14120	M	San Luis Potosí	Matehuala	21.4 km S de Matehuala	1	4	1979	1480							-100.643	23.4512
ENCB IPN	Leptonycteris yerbabuenae	14121	M	San Luis Potosí	Matehuala	21.4 km S de Matehuala	1	4	1979	1480							-100.643	23.4512
ENCB IPN	Leptonycteris yerbabuenae	14122	M	San Luis Potosí	Matehuala	21.4 km S de Matehuala	1	4	1979	1480							-100.643	23.4512
ENCB IPN	Leptonycteris yerbabuenae	14123	H	San Luis Potosí	Matehuala	21.4 km S de Matehuala	1	4	1979	1480							-100.643	23.4512
ENCB IPN	Leptonycteris yerbabuenae	14124	M	San Luis Potosí	Matehuala	21.4 km S de Matehuala	1	4	1979	1480							-100.643	23.4512
ENCB IPN	Leptonycteris yerbabuenae	14125	M	San Luis Potosí	Matehuala	21.4 km S de Matehuala	1	4	1979	1480							-100.643	23.4512
ENCB IPN	Leptonycteris yerbabuenae	14126	M	San Luis Potosí	Matehuala	21.4 km S de Matehuala	1	4	1979	1480							-100.643	23.4512
ENCB IPN	Leptonycteris yerbabuenae	14127	M	San Luis Potosí	Matehuala	21.4 km S de Matehuala	17	6	1979	1540							-100.643	23.4512
ENCB IPN	Leptonycteris yerbabuenae	14128	M	San Luis Potosí	Matehuala	21.4 km S de Matehuala	1	4	1979	1480							-100.643	23.4512
ENCB IPN	Leptonycteris yerbabuenae	14129	H	San Luis Potosí	Matehuala	21.4 km S de Matehuala	1	4	1979	1480							-100.643	23.4512
ENCB IPN	Leptonycteris yerbabuenae	14130	H	San Luis Potosí	Matehuala	21.4 km S de Matehuala	1	4	1979	1480							-100.643	23.4512
ENCB IPN	Leptonycteris yerbabuenae	5906	H	San Luis Potosí		2 km E El Custodio	23	8	1971	1100							-99.9486	22.648
ENCB IPN	Leptonycteris yerbabuenae	5907	H	San Luis Potosí		2 km E El Custodio	23	8	1971	1100							-99.9486	22.648
ENCB IPN	Leptonycteris yerbabuenae	5908	M	San Luis Potosí		2 km E El Custodio	23	8	1971	1100							-99.9486	22.648
ENCB IPN	Leptonycteris yerbabuenae	5909	H	San Luis Potosí		2 km E El Custodio	23	8	1971	1100							-99.9486	22.648
ENCB IPN	Leptonycteris yerbabuenae	5910	H	San Luis Potosí		2 km E El Custodio	23	8	1971	1100							-99.9486	22.648
ENCB IPN	Leptonycteris yerbabuenae	5911	M	San Luis Potosí		2 km E El Custodio	23	8	1971	1100							-99.9486	22.648
ENCB IPN	Leptonycteris yerbabuenae	34954	H	Sonora	Hermosillo	5Km N., Kino Nuevo, Mpio Hermosillo	3	7	1992	170							-112.01	28.9
ENCB IPN	Leptonycteris yerbabuenae	13590	M	Sonora	Bahía Kino		24	7	1973								-111.94	28.82
CNMA IB	Leptonycteris yerbabuenae	13588	M	Sonora		8Km NNW, Estación Don	22	7	1973	70							-109.07	26.47
CNMA IB	Leptonycteris yerbabuenae	13589	M	Sonora		8Km NNW, Estación Don	22	7	1973	70							-109.07	26.47
CNMA IB	Leptonycteris yerbabuenae	13652	M	Sonora	Aduana	10mi W, Alamos (Aduana)	14	5	1954								-109.01	27.03
CNMA IB	Leptonycteris yerbabuenae	13653	H	Sonora	Aduana	10mi W, Alamos (Aduana)	14	5	1954								-109.01	27.03
CNMA IB	Leptonycteris yerbabuenae	13654	H	Sonora	Aduana	10mi W, Alamos (Aduana)	14	5	1954								-109.01	27.03
CNMA IB	Leptonycteris yerbabuenae	13655	H	Sonora	Aduana	10mi W, Alamos (Aduana)	14	5	1954								-109.01	27.03
CNMA IB	Leptonycteris yerbabuenae	30082	H	Sonora	Carbó	Cueva del Tigre, 15mi E Carbó	4	6	1970								-102.75	18.07
CNMA IB	Leptonycteris yerbabuenae	23902	M	Sonora	Isla Tiburón	Isla Tiburón, Punta Sur	11	8	1986								-112.375	28.9609
CNMA IB	Leptonycteris yerbabuenae	29528	H	Tamaulipas	Jiménez	13 mi W, 6.5miN Jiménez	27	8	1961	1250ft							-98.67	24.3
CNMA IB	Leptonycteris yerbabuenae	29529	H	Tamaulipas	Jiménez	14 mi W, 6.5miN Jiménez	27	8	1961	1250ft							-98.67	24.3
CNMA IB	Leptonycteris yerbabuenae	42432	H	Tamaulipas	Ciudad del Monte	10 km S, 6 km W	2	7	2000								-97.9677	22.2412
CNMA IB	Leptonycteris yerbabuenae	41895	H	Tamaulipas	Ciudad del Monte	10 km S, 6 km W	17	9	1994								-97.9677	22.2412
ENCB IPN	Leptonycteris yerbabuenae	14800	H	TLAXCALA	Santa Cruz	Santa Cruz La Trinidad	23	9	1995	2250	19	20	34	98	18	13	-98.3036	19.3428
ENCB IPN	Leptonycteris yerbabuenae	14801	?	TLAXCALA	Santa Cruz	Mazapa	23	9	1995	2750	19	20	34	98	18	13	-98.3036	19.3428
UAMI	Leptonycteris yerbabuenae	7120	H	Veracruz	Medellín	Casa de Rincon del Diablo, medellín	4	11	2002								-96.15	19.05
UAMI	Leptonycteris yerbabuenae	7121	M	Veracruz	Medellín	Casa de Rincon del Diablo, medellín	4	11	2002								-96.15	19.05
CNMA IB	Leptonycteris yerbabuenae	7112	M	Veracruz	Boca del Río	Rancho El Novillero, 2Km SSW, Boca del Río	4	11	2002								-96.11	19.08
CNMA IB	Leptonycteris yerbabuenae	7113	H	Veracruz	Boca del Río	Rancho El Novillero, 2Km SSW, Boca del Río	4	11	2002								-96.11	19.08
CNMA IB	Leptonycteris yerbabuenae	7114	M	Veracruz	Boca del Río	Rancho El Novillero, 2Km SSW, Boca del Río	4	11	2002								-96.11	19.08
CNMA IB	Leptonycteris yerbabuenae	7115	M	Veracruz	Boca del Río	Rancho El Novillero, 2Km SSW, Boca del Río	4	11	2002								-96.11	19.08
CNMA IB	Leptonycteris yerbabuenae	7117	M	Veracruz	Boca del Río	Rancho El Novillero, 2Km SSW, Boca del Río	4	11	2002								-96.11	19.08
CNMA IB	Leptonycteris yerbabuenae	7118	M	Veracruz	Boca del Río	Rancho El Novillero, 2Km SSW, Boca del Río	4	11	2002								-96.11	19.08
CNMA IB	Leptonycteris yerbabuenae	7119	M	Veracruz	Boca del Río	Rancho El Novillero, 2Km SSW, Boca del Río	4	11	2002								-96.11	19.08
CNMA IB	Leptonycteris yerbabuenae	7425	M	Veracruz	Boca del Río	Rancho El Novillero, 2Km SSW, Boca del Río	23	3	1963								-96.1	19.1
CNMA IB	Leptonycteris yerbabuenae	1488	H	Veracruz	Boca del Río		22	7	1954								-96.1063	19.1063
CNMA IB	Leptonycteris yerbabuenae	4722	H	Veracruz	Boca del Río		22	7	1954								-96.1063	19.1063
CNMA IB	Leptonycteris yerbabuenae	4733	H	Veracruz	Boca del Río		22	7	1954								-96.1063	19.1063
CNMA IB	Leptonycteris yerbabuenae	4639	M	Veracruz		1 km E Teocelo	21	7	1970	1150							-96.971	19.3845
CNMA IB	Leptonycteris yerbabuenae	20413	M	Zacatecas	San Juan Capistrano	15.5 km S, 17.1 km W	8	4	1985								-103.739	22.6282
ENCB IPN	Leptonycteris yerbabuenae	469	M		Chicomostoc	Cerro Teutli	8	7	1947								-99.169	19.311
ENCB IPN	Leptonycteris yerbabuenae	470	H		Chicomostoc	Cerro Teutli	8	7	1947								-99.169	19.311
CNMA IB	Leptonycteris yerbabuenae	471	H		Chicomostoc	Cerro Teutli	8	7	1947								-99.169	19.311
CNMA IB	Leptonycteris yerbabuenae	472	H		Chicomostoc	Cerro Teutli	8	7	1947								-99.169	19.311
CNMA IB	Leptonycteris yerbabuenae	478	H		Chicomostoc	Cerro Teutli	24	6	1947								-99.169	19.311
CNMA IB	Leptonycteris yerbabuenae	479	M		Chicomostoc	Cerro Teutli	24	6	1947								-99.169	19.311
CNMA IB	Leptonycteris yerbabuenae			Chiapas	Ocozocoautla	Cueva El Tempisque	4	10	1999								-93.3742	16.7598
CNMA IB	Leptonycteris yerbabuenae			Hidalgo		Xoxafi	24	4	2000								-99.0276	20.3883
COLECTA RETS	Leptonycteris yerbabuenae			Puebla		Tzinacanostoc, Jolalpan	11	10	1999								-98.8445	18.3201
COLECTA RETS	Leptonycteris yerbabuenae			Chiapas		Cueva El Tempisque, Chiapas	15	6	1997								-93.3742	16.7598
COLECTA RETS	Leptonycteris yerbabuenae			Chiapas		Cueva Los Laguitos	1	6	1998								-93.1486	16.7783
COLECTA RETS	Leptonycteris yerbabuenae			Chiapas	TUXTLA GUTIERREZ	Los Laguitos	8	12	1999								-93.1486	16.7783
COLECTA RETS	Leptonycteris yerbabuenae			Colima		Callejones	5	11	2005								-103.874	18.9171
COLECTA RETS	Leptonycteris yerbabuenae			Guerrero	Cuaxilotla		17	10	1998								-99.8516	18.1725
COLECTA RETS	Leptonycteris yerbabuenae			Hidalgo	Tequesquitengo	Idolo	31	8	1997								-99.26	18.59
COLECTA RETS	Leptonycteris yerbabuenae			Hidalgo	Meztitlán	El Salitre	6	10	2006								-98.7632	20.5956
COLECTA RETS	Leptonycteris yerbabuenae			Jalisco	TUXCUECA	Cueva "La barranca"			2001								-103.367	20.0656
COLECTA RETS	Leptonycteris yerbabuenae			Ciudad de México	D.F	Jardín Botánico	10	6	1997								-99.1935	19.3196
COLECTA RETS	Leptonycteris yerbabuenae			Michoacán		Grutas de Tziranda, Cd. Hidalgo	27	8	2006								-100.502	19.6399
COLECTA RETS	Leptonycteris yerbabuenae			Michoacán		Isla de Janitzio, Michoacan	13	9	1999								-101.652	19.5736
COLECTA RETS	Leptonycteris yerbabuenae			Nayarit		Las Lumbres	25	10	1999								-105.206	22.2284
COLECTA RETS	Leptonycteris yerbabuenae			Puebla	Tanampulco	Las Vegas	11	12	1998								-97.4054	20.17
COLECTA RETS	Leptonycteris yerbabuenae			Puebla	Jolalpan	Tzinacanostoc	10	12	1998								-98.8445	18.3259
COLECTA RETS	Leptonycteris yerbabuenae			Puebla	San Lorenzo	Tehuacan	4	7	1999								-97.4004	18.4664
COLECTA RETS	Leptonycteris yerbabuenae			Sinaloa		Navachiste, Ahome	2	4	2000								-108.838	25.4655
COLECTA RETS	Leptonycteris yerbabuenae			Morelos	Jojutla	El Salitre											-98.958	18.6757
COLECTA RETS	Leptonycteris yerbabuenae			Guerrero	Colotipla	Cueva Juxtlahuaca											-99.16	17.44
COLECTA RETS	Leptonycteris yerbabuenae			Edo. De México	Tonático	Tonatico											-99.6605	18.8077
COLECTA RETS	Leptonycteris yerbabuenae			Sinaloa	Concordia	Mina El Aval											-106.05	23.258
COLECTA RETS	Leptonycteris yerbabuenae		FEMALE			0.25 mi S Mulege											-111.979	26.89
COLECTA RETS	Leptonycteris yerbabuenae		FEMALE			0.5 KM W HUEJUTLA											-98.425	21.1407
CNMA IB	Leptonycteris yerbabuenae	30071	M	Michoacan	Lázaro Cárdenas		26	3	1979	10							-102.194	17.9564
CNMA IB	Leptonycteris yerbabuenae	3891	M	Guerrero	Zihuatanejo	10 Km NW posquelites	14	4	1985								-101.63	17
CNMA IB	Leptonycteris yerbabuenae	37384	M	Durango	Mapimí	Cerro San Ignacio, 4.6Km NE Rancho San Ignacio	3	8	1994	1210msnm							-104	26.56
CNMA IB	Leptonycteris yerbabuenae	33077	M	Coahuila	Arteaga	13 min S + 2mi E de Arteaga	9	7	1949	7501 ft							-100.851	25.2656
